# Supplementary material for: Mechanistic study of NHC-catalyzed oxidative N vs. O chemoselective acylation of aldehydes with alkanolamines
Source: Royal Society of Chemistry journal article supplement (doi:10.1039/d4nj00189c), 2024-01-01
Supplement: d4nj00189c1.pdf [file d4nj00189c1.pdf]

Electronic Supplementary Material (ESI) for New *Journal of Chemistry*.  
This journal is © the Partner Organisations 2022

## Supporting Information for

### **Theoretical study on mechanism of NHC-catalyzed oxidative *N* vs *O* chemoselective acylation of aldehydes with alkanolamines.**

Yuan Sang, Ojo Joseph, Haiyan Yuan † and Jingping Zhang †

*Jilin Province Key Laboratory of Organic Functional Molecular Design & Synthesis, Advanced Energy Materials Research Center, Faculty of Chemistry, Northeast Normal University, Renmin Street 5268#, Changchun 130024, P. R. China.*

*E-mail: jpzhang@nenu.edu.cn, yuanhy034@nenu.deu.cn*

#### **Table of Content**

|                                                                                                  |     |
|--------------------------------------------------------------------------------------------------|-----|
| Part 1: A plausible mechanism proposed Maheswari and coworkers.....                              | S2  |
| Part 2: Deprotonation pathways of precursor <b>NHC·H<sup>+</sup></b> .....                       | S3  |
| Part 3: The possible channels for the formation of bromoamine intermediates.....                 | S5  |
| Part 4: Another path of generating <b>PR1</b> from intermediates <b>M1</b> and <b>M2</b> .....   | S14 |
| Part 5: The two paths of generating <b>PR2</b> from intermediates <b>M1</b> and <b>M2'</b> ..... | S15 |
| Part 6: The AIM analysis details of <b>TS3b</b> and <b>TS3b'</b> .....                           | S17 |
| Part 7: The AIM analysis details of <b>TS5</b> and <b>TS5'</b> .....                             | S18 |
| Part 8: List of Cartesian coordinates of all structures involved in this work.....               | S19 |

## Part 1. Plausible mechanism

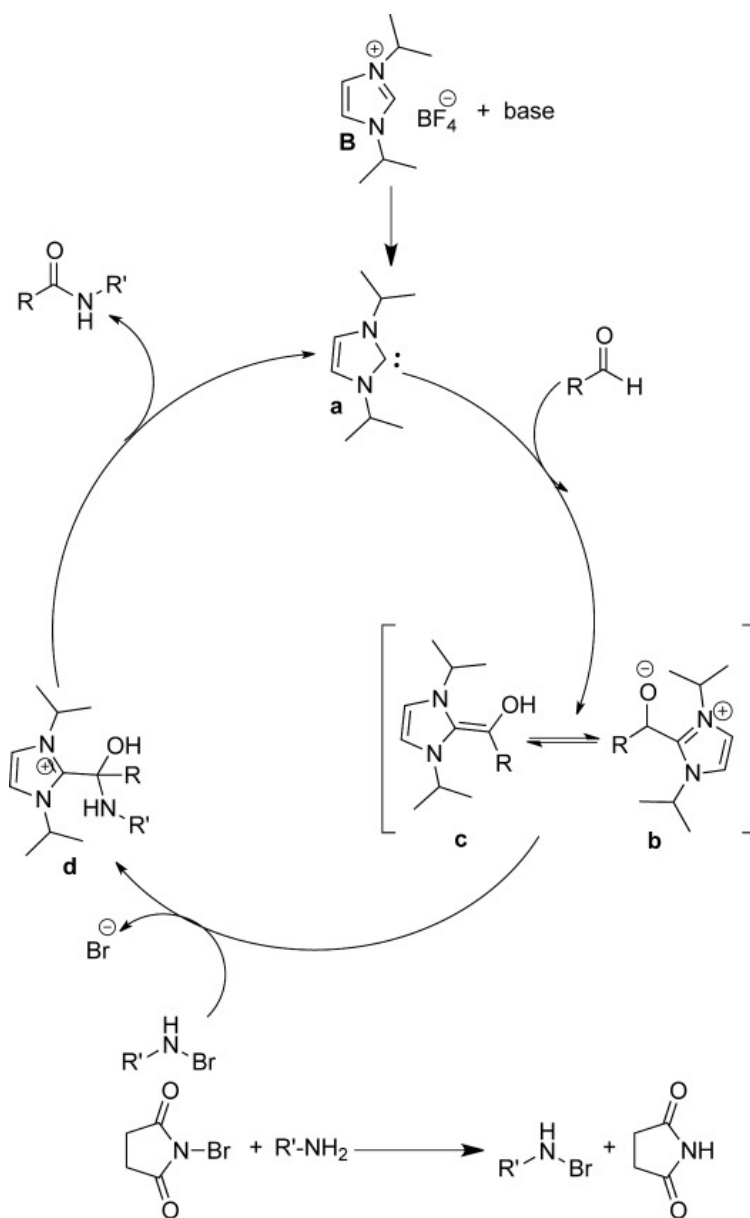

**Scheme S1** A plausible mechanism proposed Maheswari and coworkers.

## Part 2: Deprotonation pathways of precursor NHC·H<sup>+</sup>

We have calculated Et<sub>3</sub>N-assisted directly deprotonation process of the pre catalyst, and found that the generation of active NHC is impossible. We also considered 3Et<sub>3</sub>N-, 2Et<sub>3</sub>N-, CH<sub>3</sub>CN-, BF<sub>4</sub><sup>-</sup>-H<sub>2</sub>O-, BF<sub>4</sub><sup>-</sup>-, 2H<sub>2</sub>O-, and H<sub>2</sub>O-CH<sub>3</sub>CN-assisted deprotonation, whereas the relative Gibbs energies of product NHC are higher than those of the corresponding transition states in the range of 2.4-6.5 kcal/mol except the H<sub>2</sub>O-CH<sub>3</sub>CN-assisted case with lower of 0.2 kcal/mol (Figure S2). Moreover, the above reactions are all endothermic processes.

Thereby, we considered one molecule of Et<sub>3</sub>N and one molecule of water assisted deprotonation of the pre catalyst. Although the reverse energy barrier of this process is smaller than the forward energy barrier, considering reversible reaction equilibrium and the relative Gibbs energy of the formation of NHC is 1 kcal/mol lower than that of the **TS0**, there may be activated catalysts exist in the system for subsequent reactions.

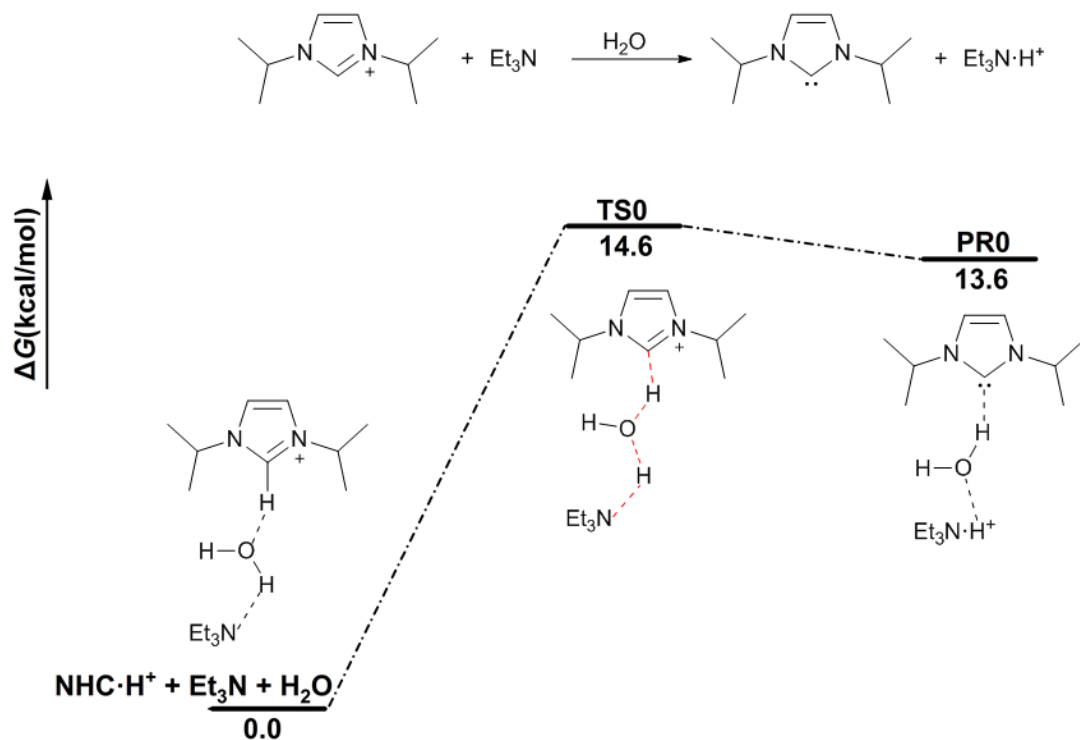

**Figure S1** Free energy profile for Et<sub>3</sub>N and H<sub>2</sub>O assisted deprotonation pathways of precursor NHC·H<sup>+</sup>, relative free energies are in kcal/mol.

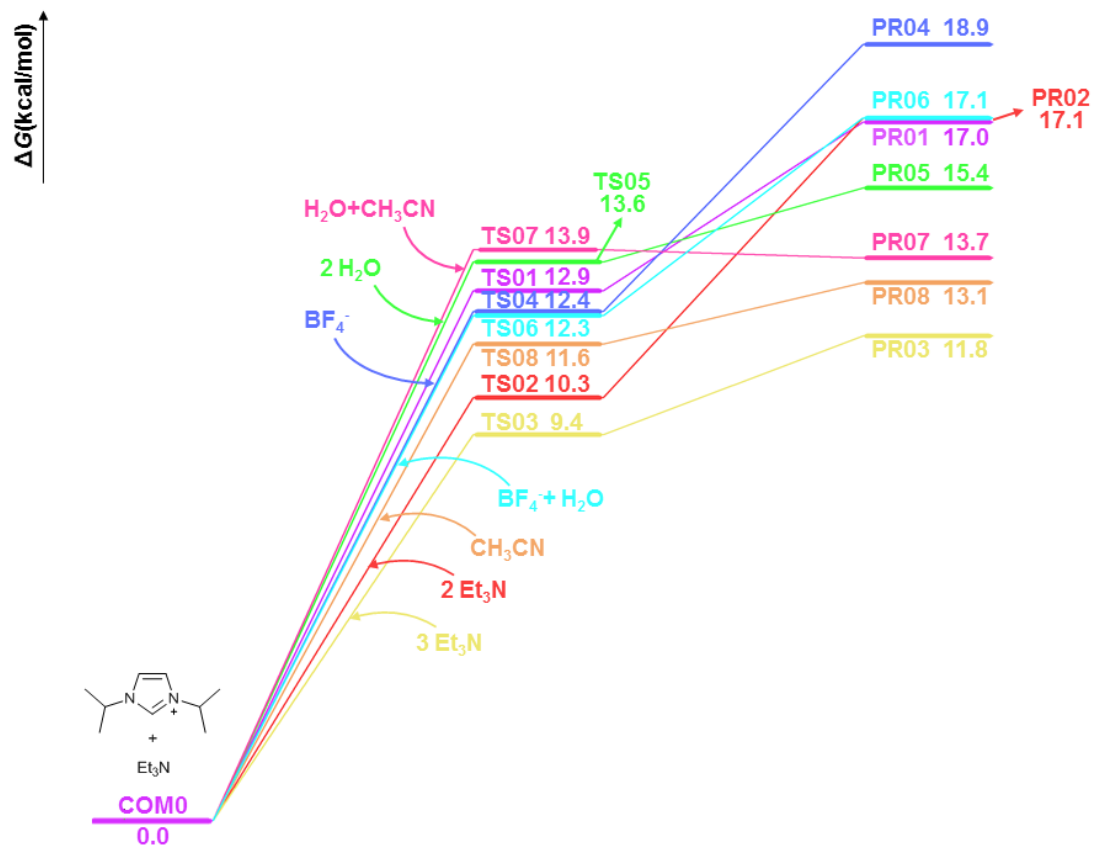

**Figure S2** Free energy profile for different pathways for deprotonation of precursor NHC·H<sup>+</sup>.

### Part 3: Formation of bromoamine intermediate

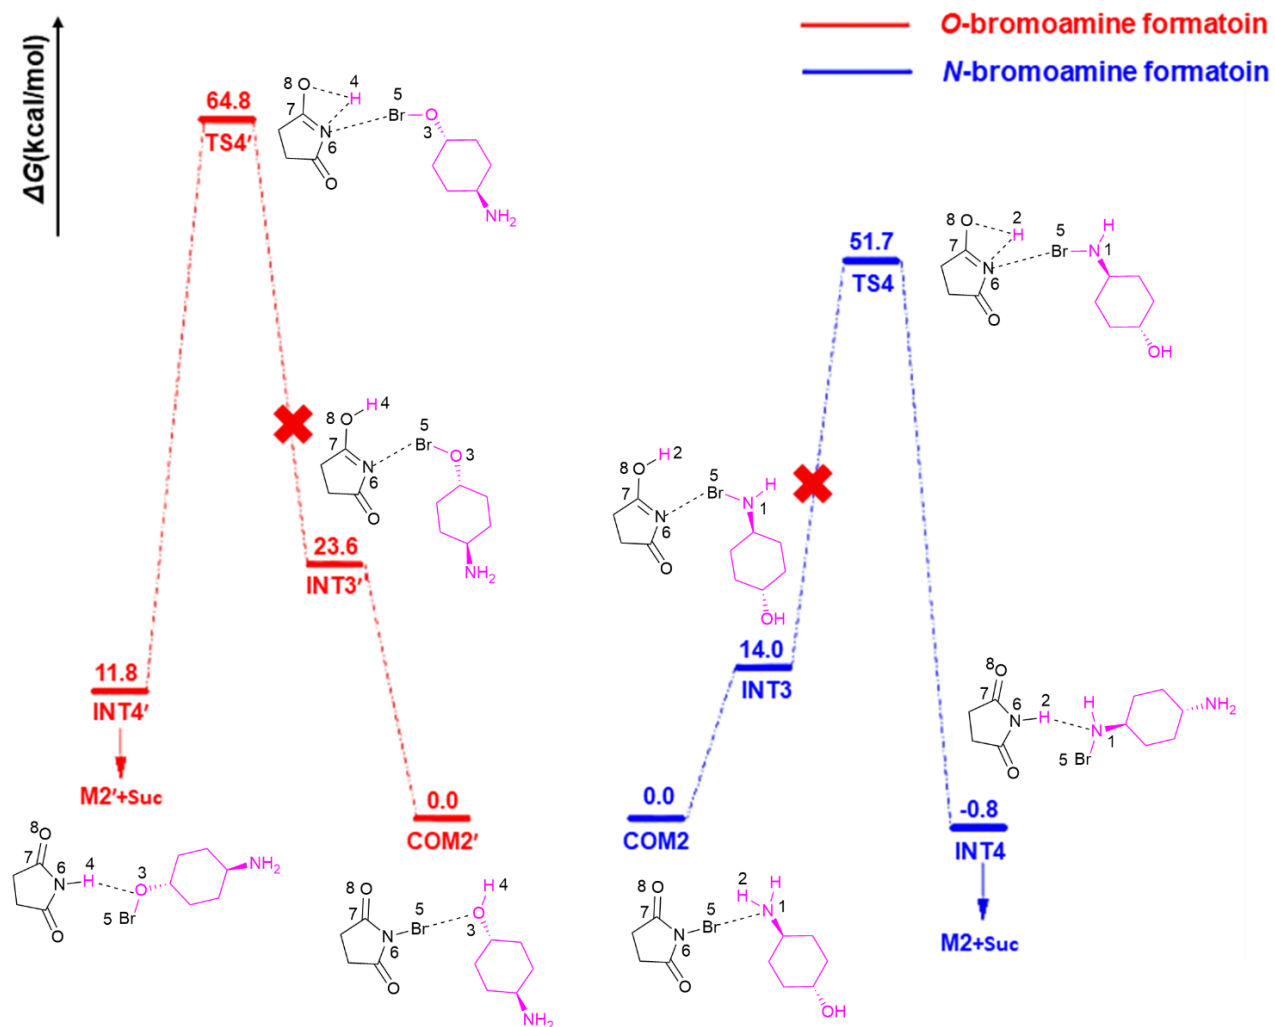

**Figure S3** Free energy profile for unassisted bromoamine intermediate formation, relative free energies are in kcal/mol.

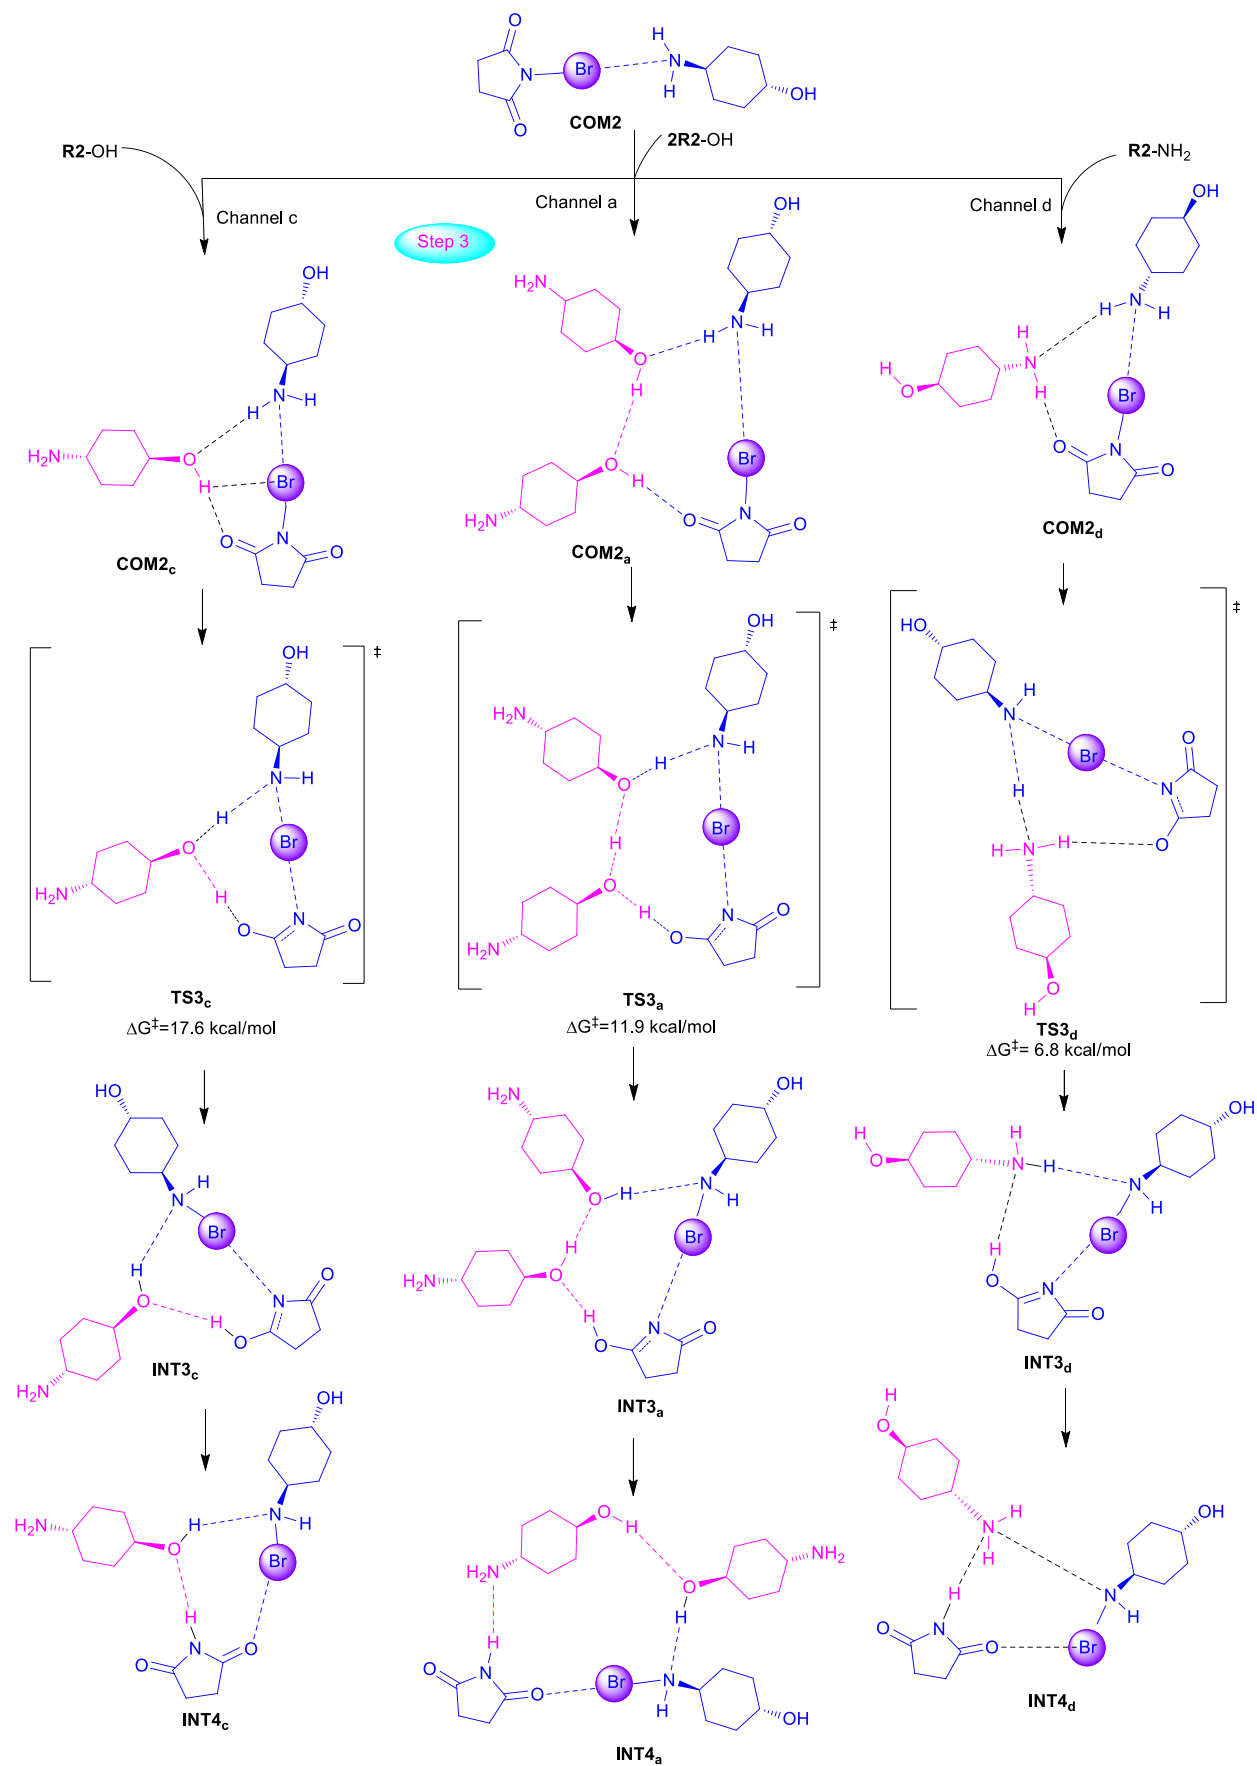

**Scheme S2** The possible reaction channels a, c and d for *N*-Bromoamine intermediate formation.

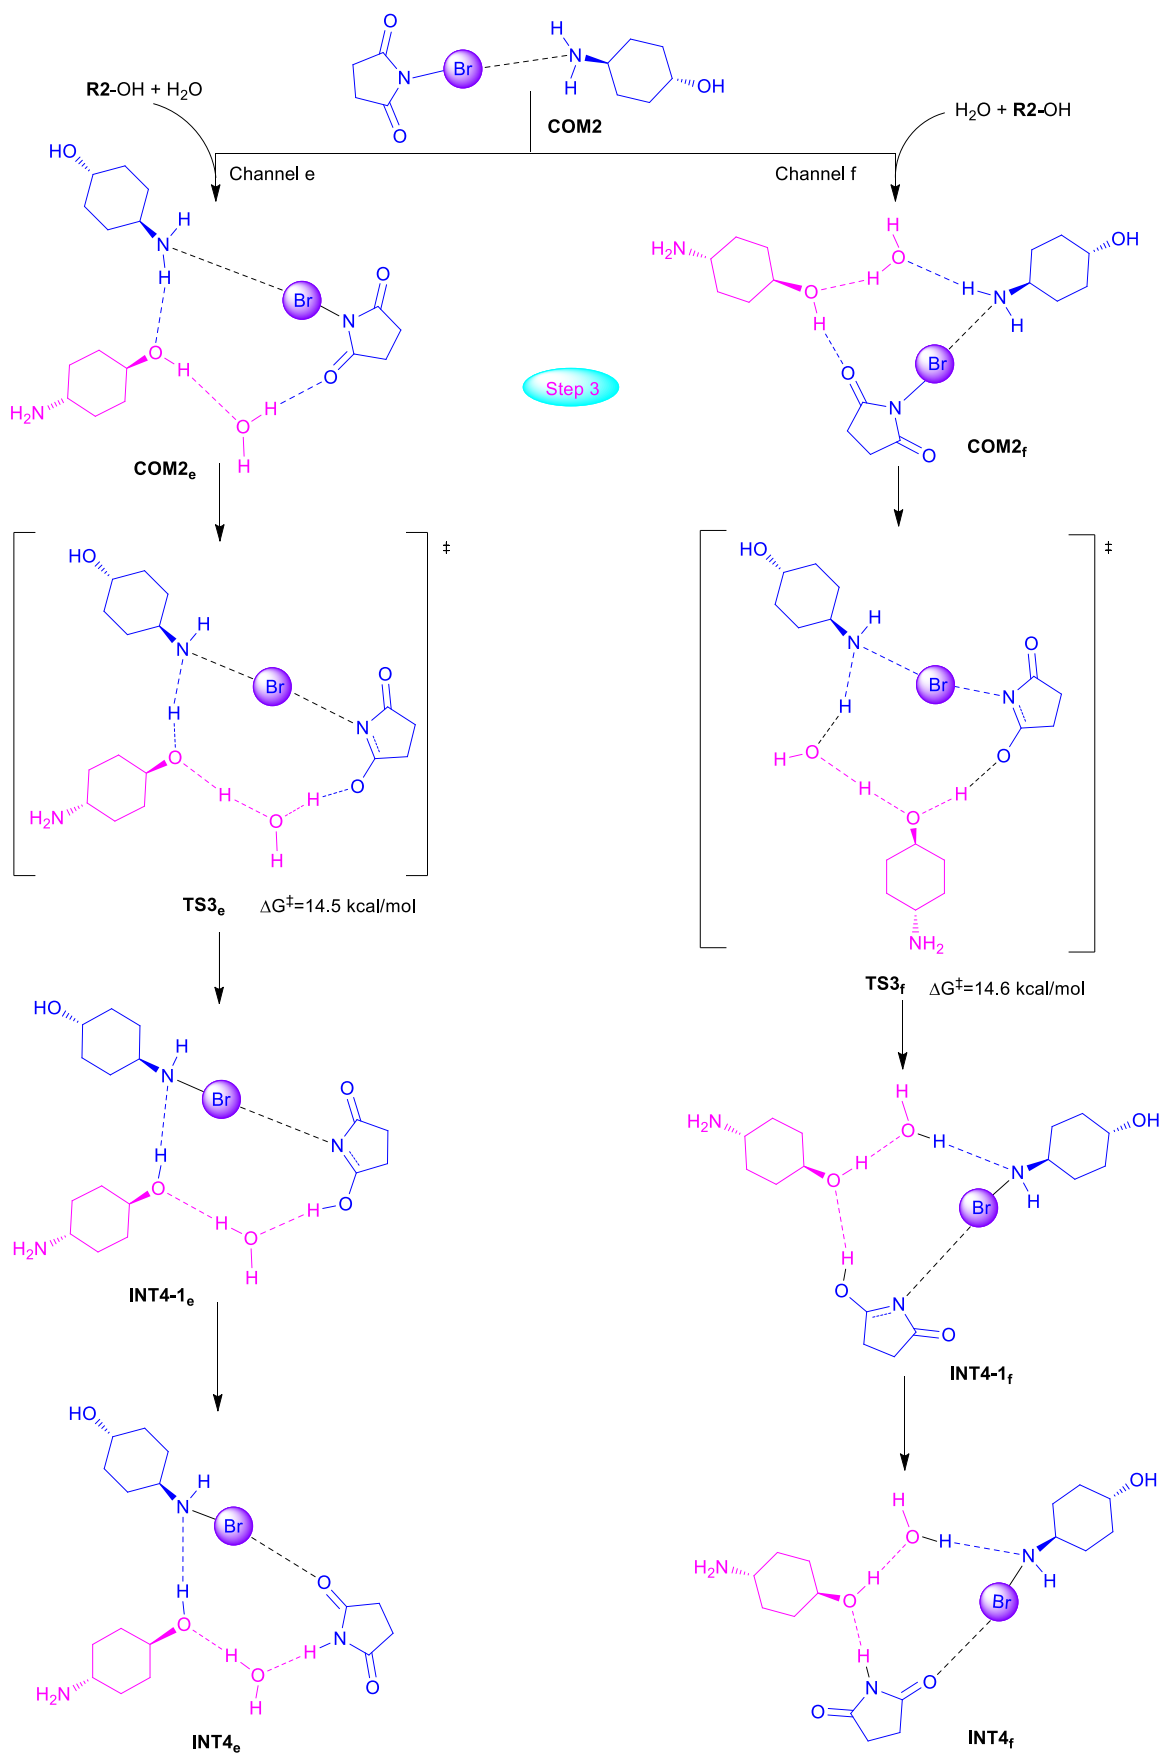

**Scheme S3** The possible reaction channels e and f for *N*-Bromoamine intermediate formation.

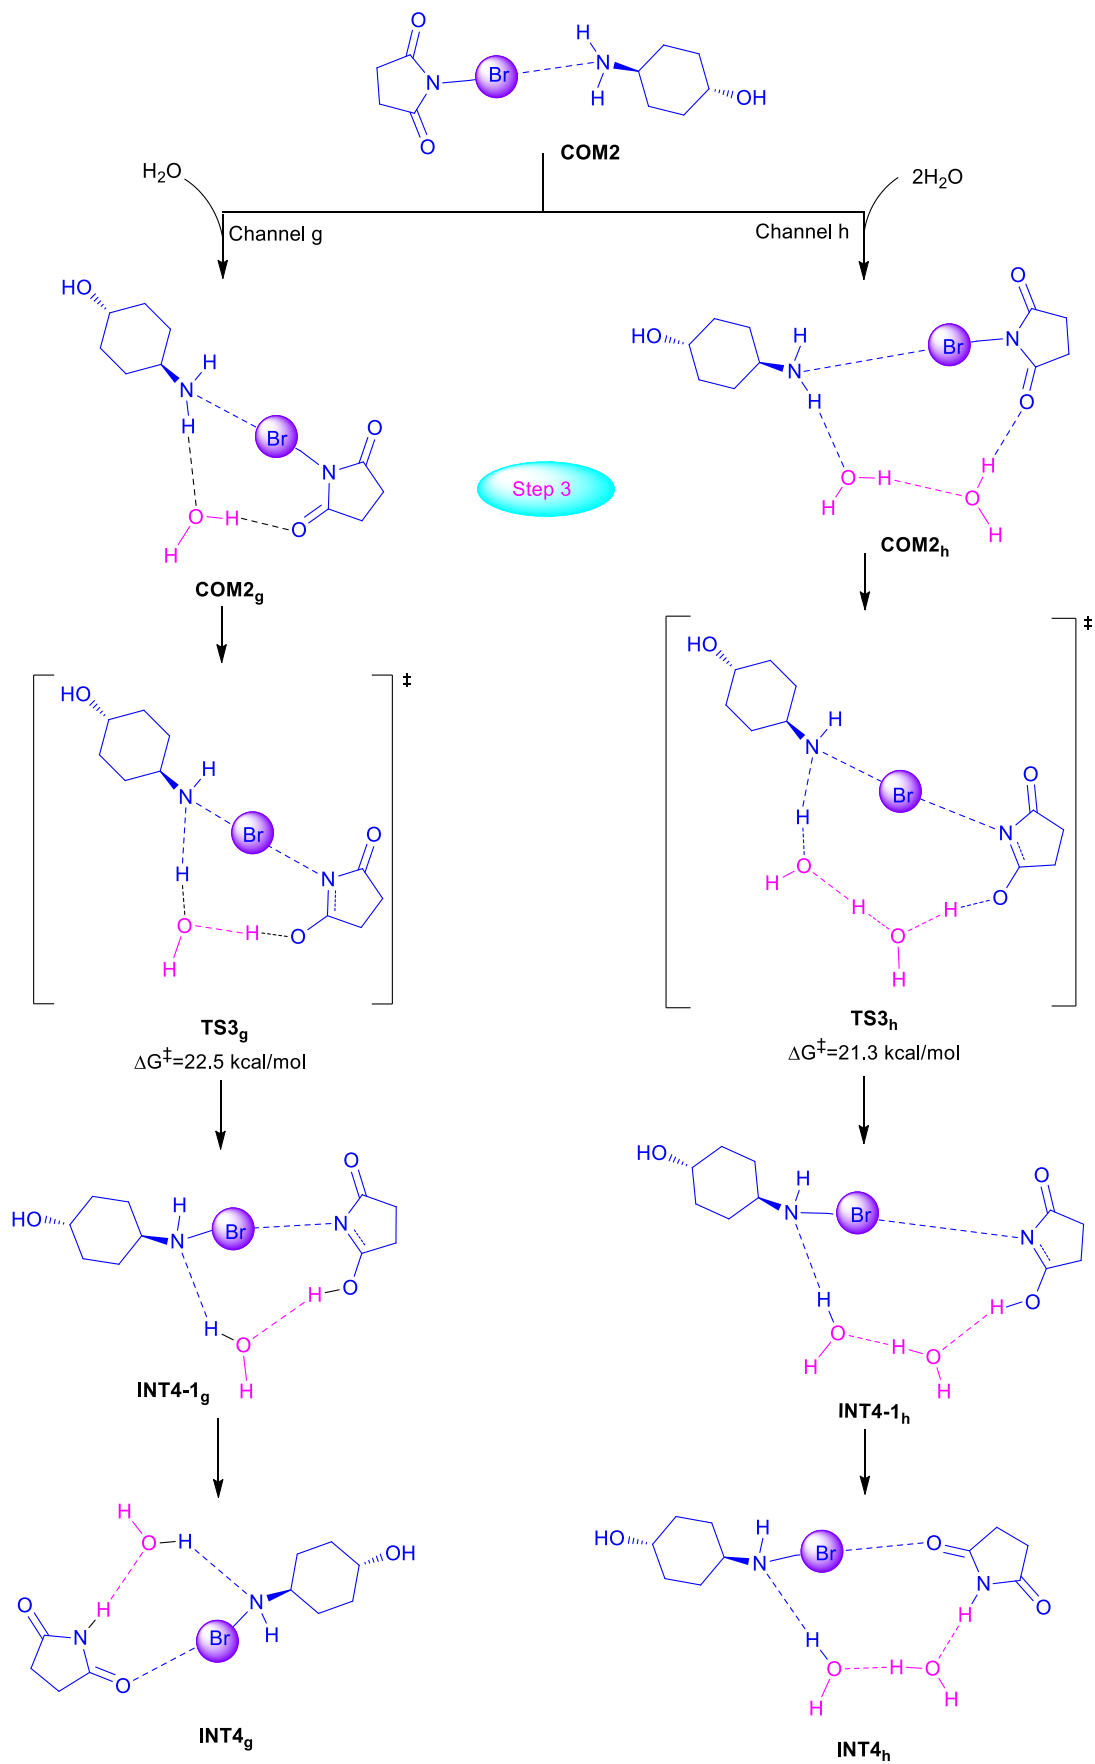

**Scheme S4** The possible reaction channels g and h for *N*-Bromoamine intermediate formation.



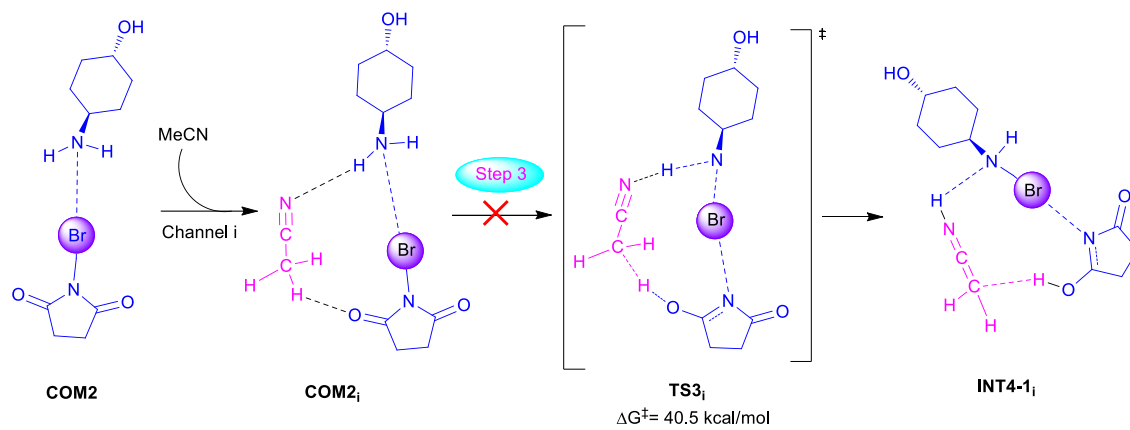

**Scheme S5** The possible reaction channel i for *N*-Bromoamine intermediate formation.

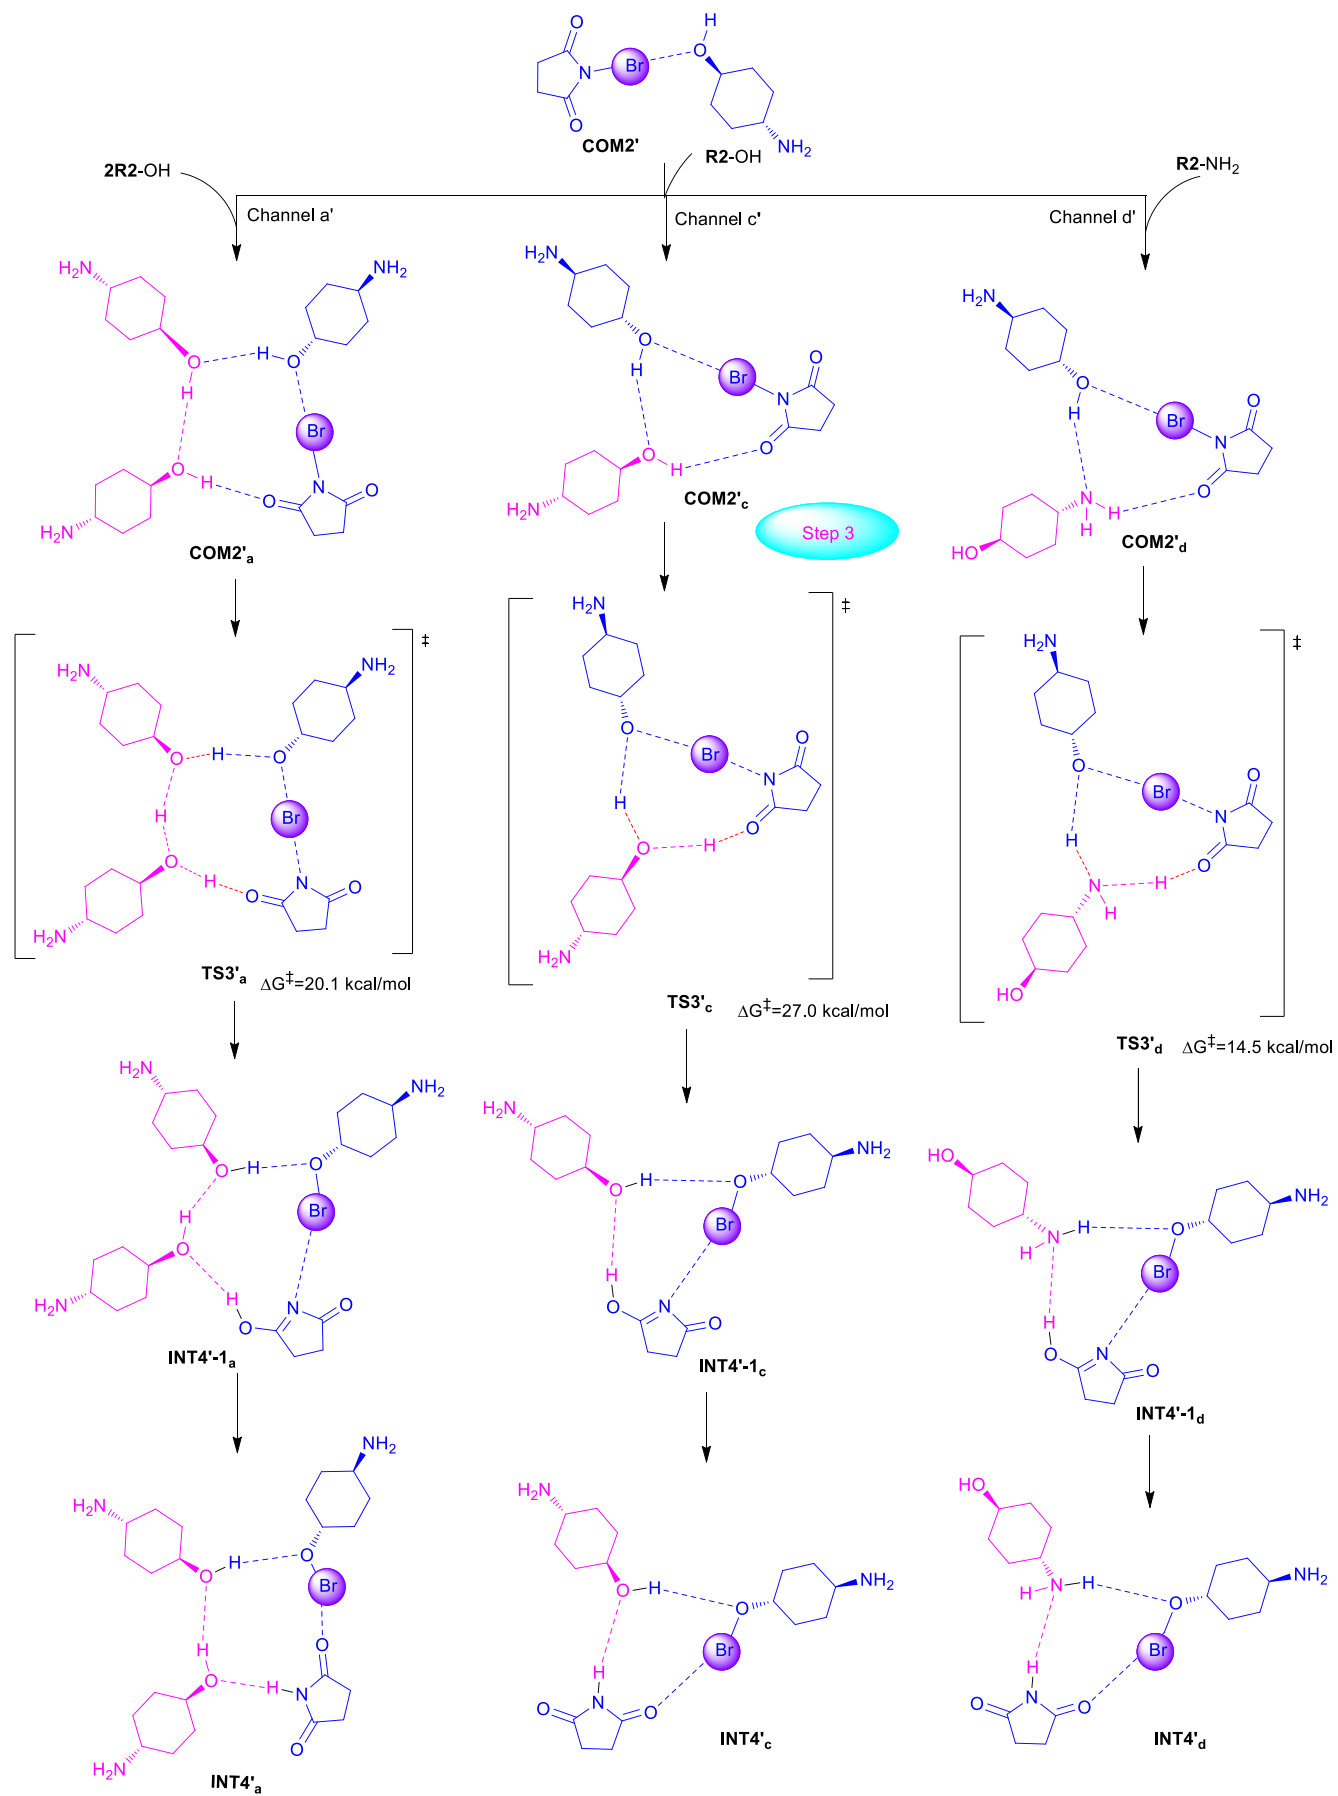

**Scheme S6** The possible reaction channel a' and c' for *O*-Bromoamine intermediate formation.

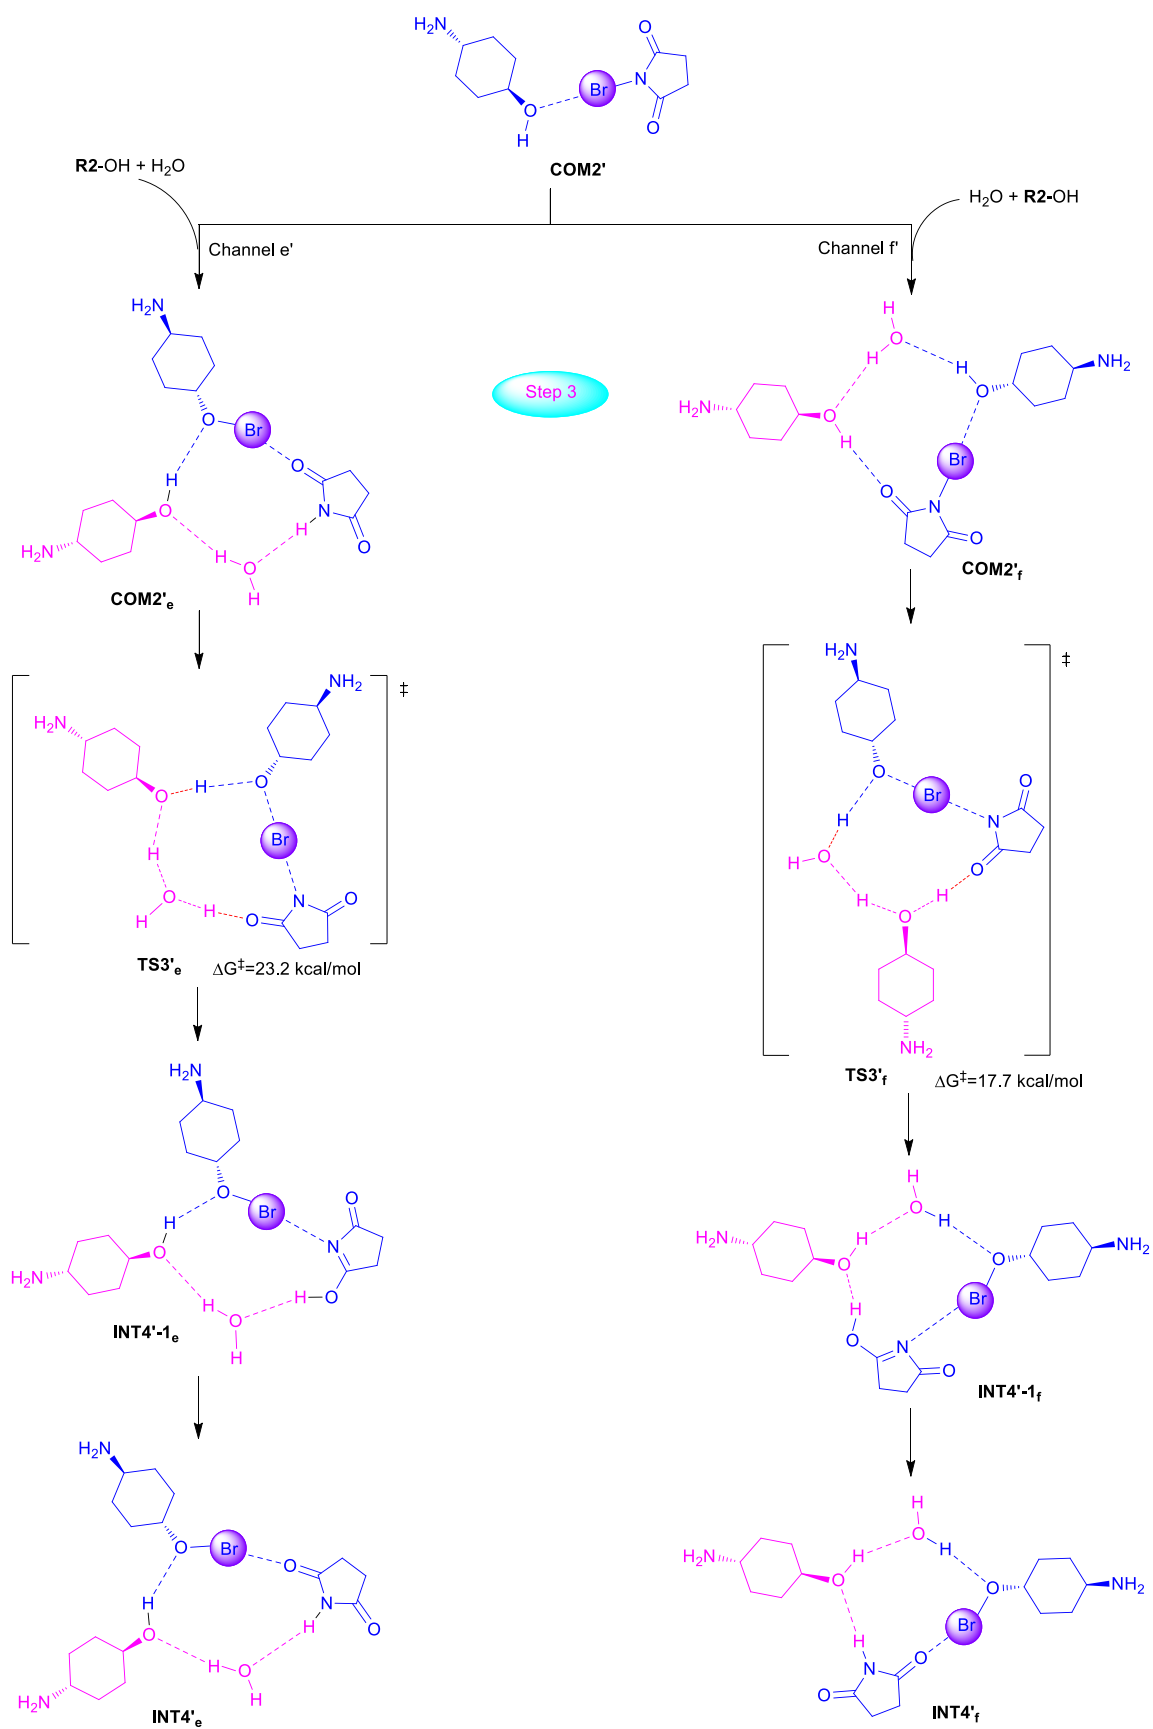

**Scheme S7** The possible reaction channel e' and f' for *O*-Bromoamine intermediate formation.

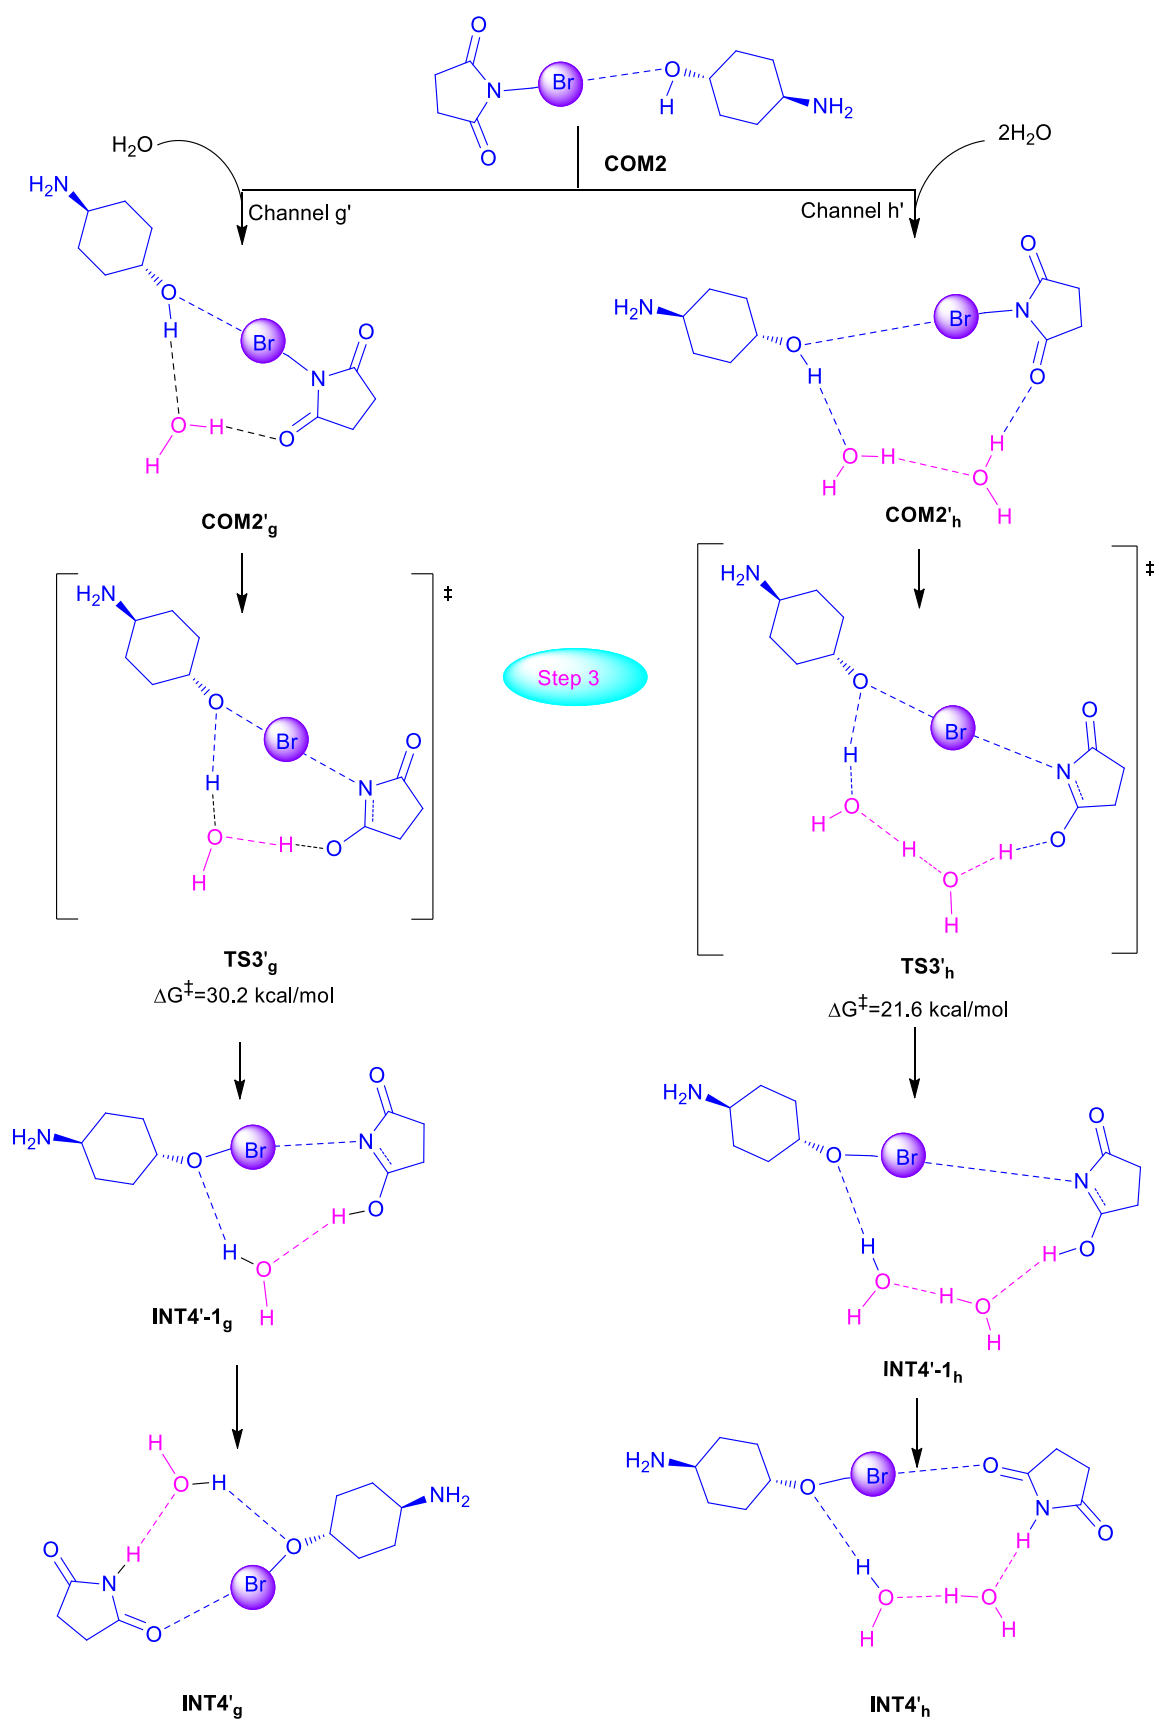

**Scheme S8** The possible reaction channels g' and h' for *O*-Bromoamine intermediate formation.

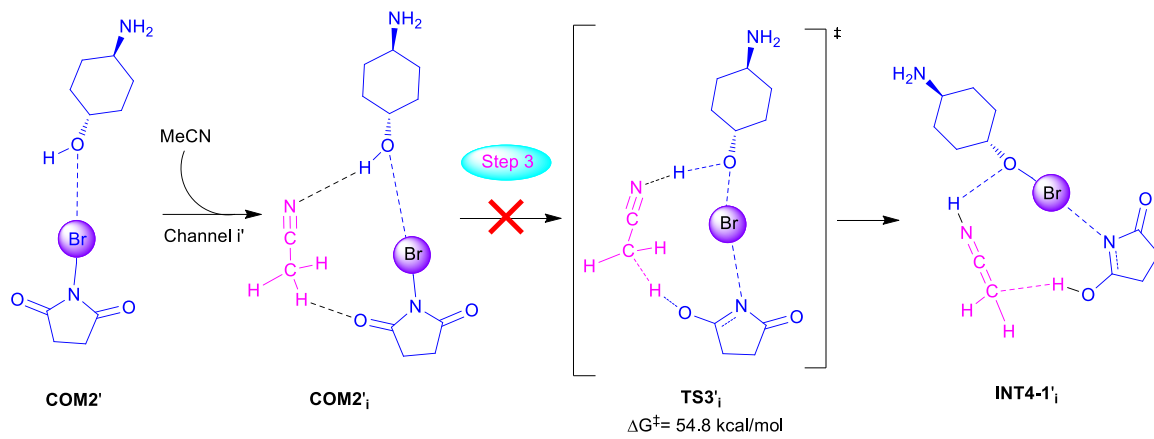

**Scheme S9** The possible reaction channel *i'* for *O*-Bromoamine intermediate formation.

Part 4: Another process of generating PR1 from intermediates M1 and M2

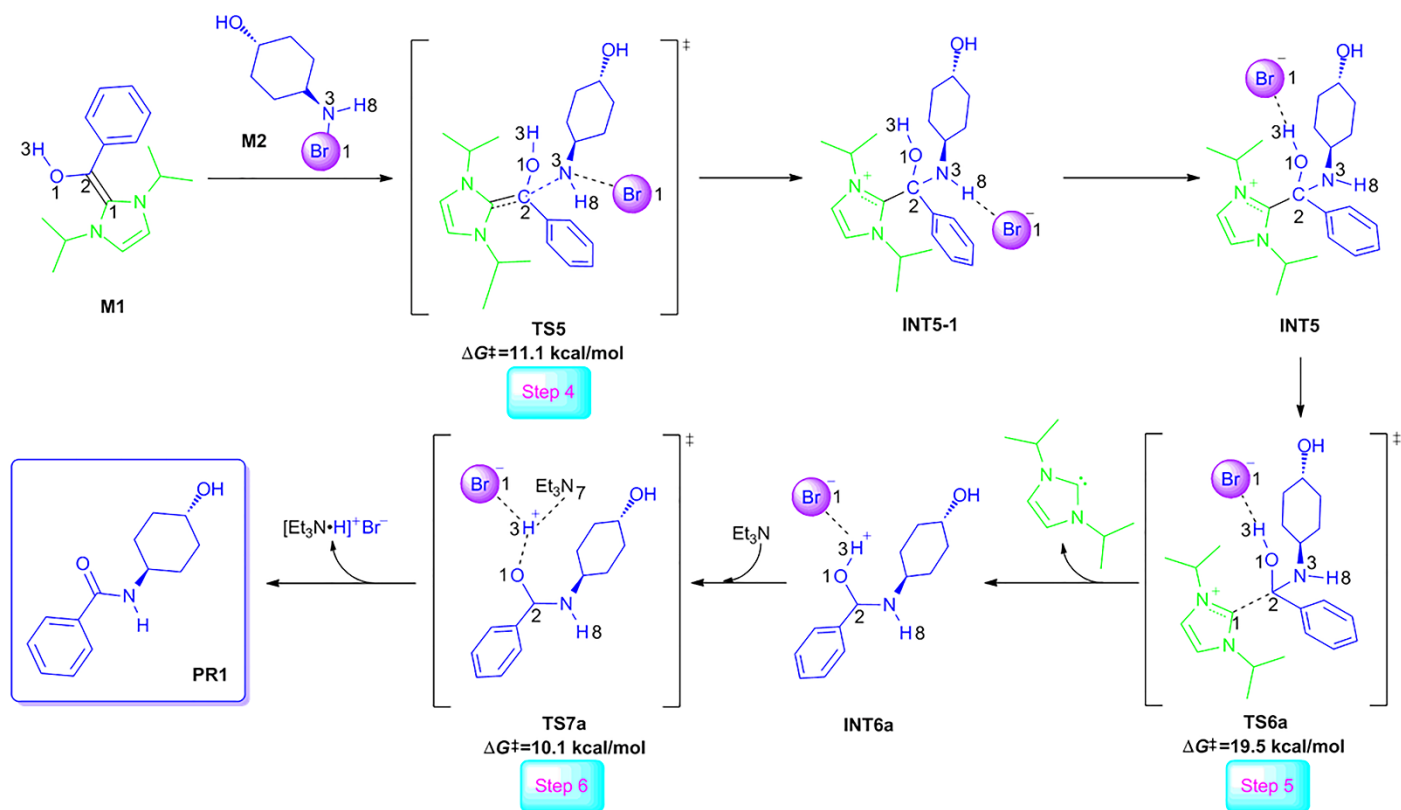

Scheme S10 The process of first removing NHC and then removing HBr to generate the main product.

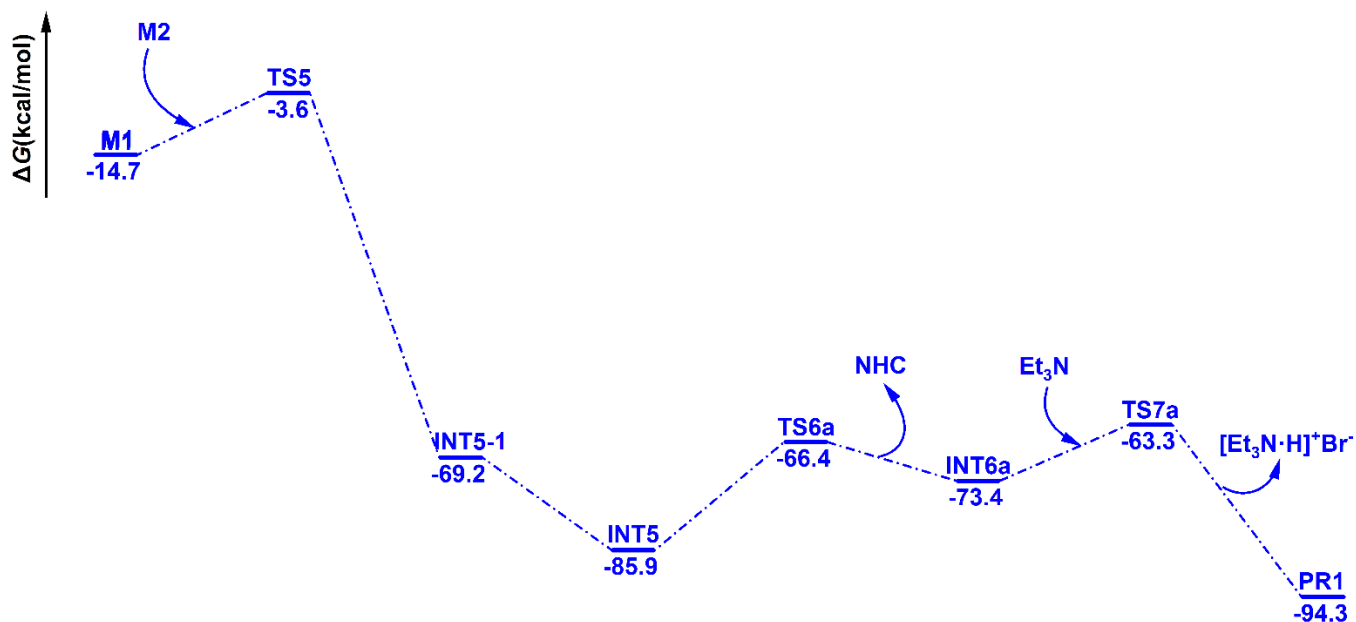

Fig. S4 Free energy profile for the PR1 formation. The relative free energies are in kcal/mol.

Part 5: The process of generating PR2 from intermediates M1 and M2'

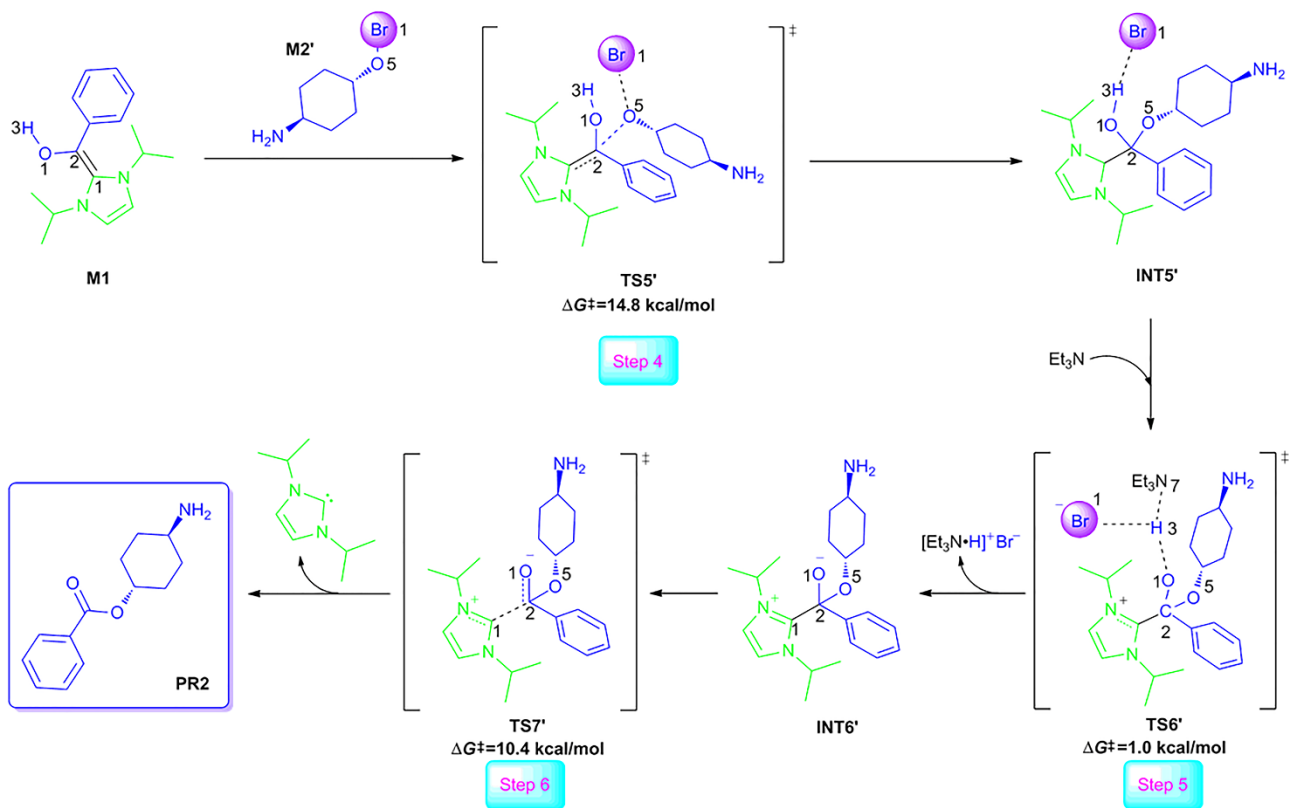

Scheme S11 The process of removing HBr and then removing NHC to generate PR2.

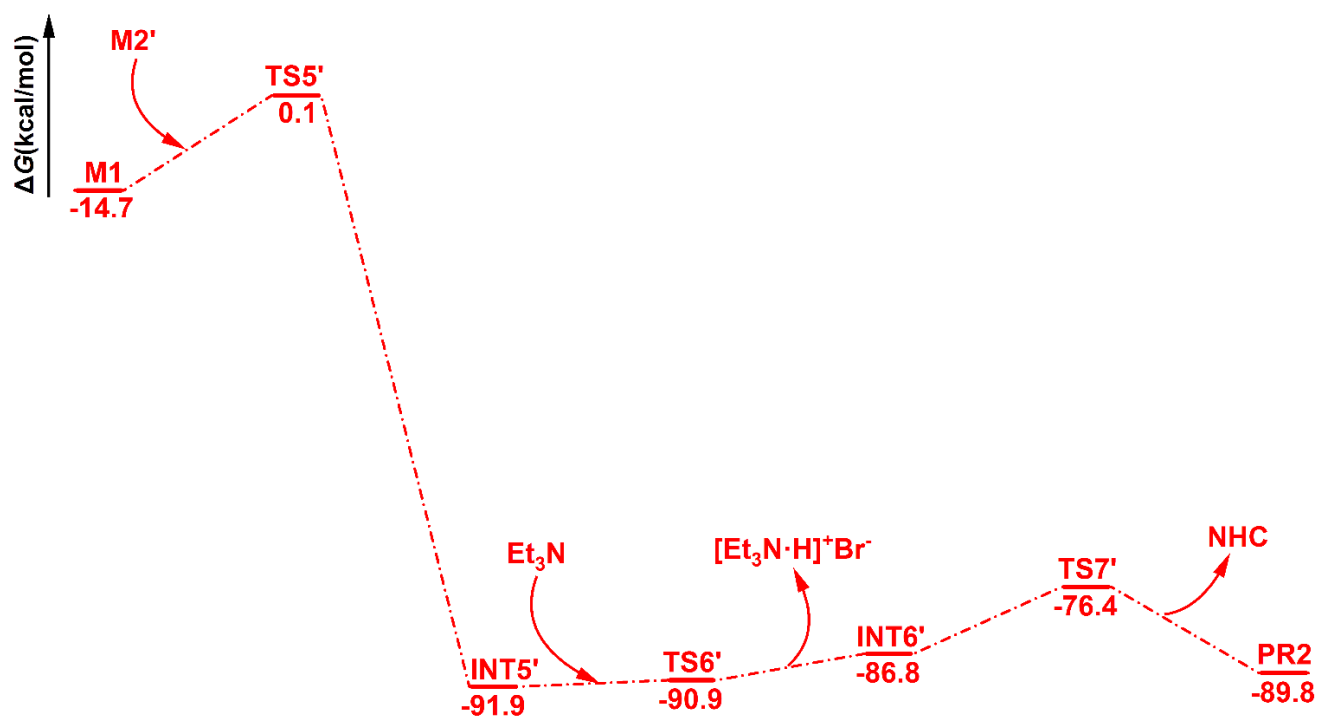

Fig. S5 Free energy profile for removing HBr and then removing NHC to generate PR2. The relative free energies are in kcal/mol.

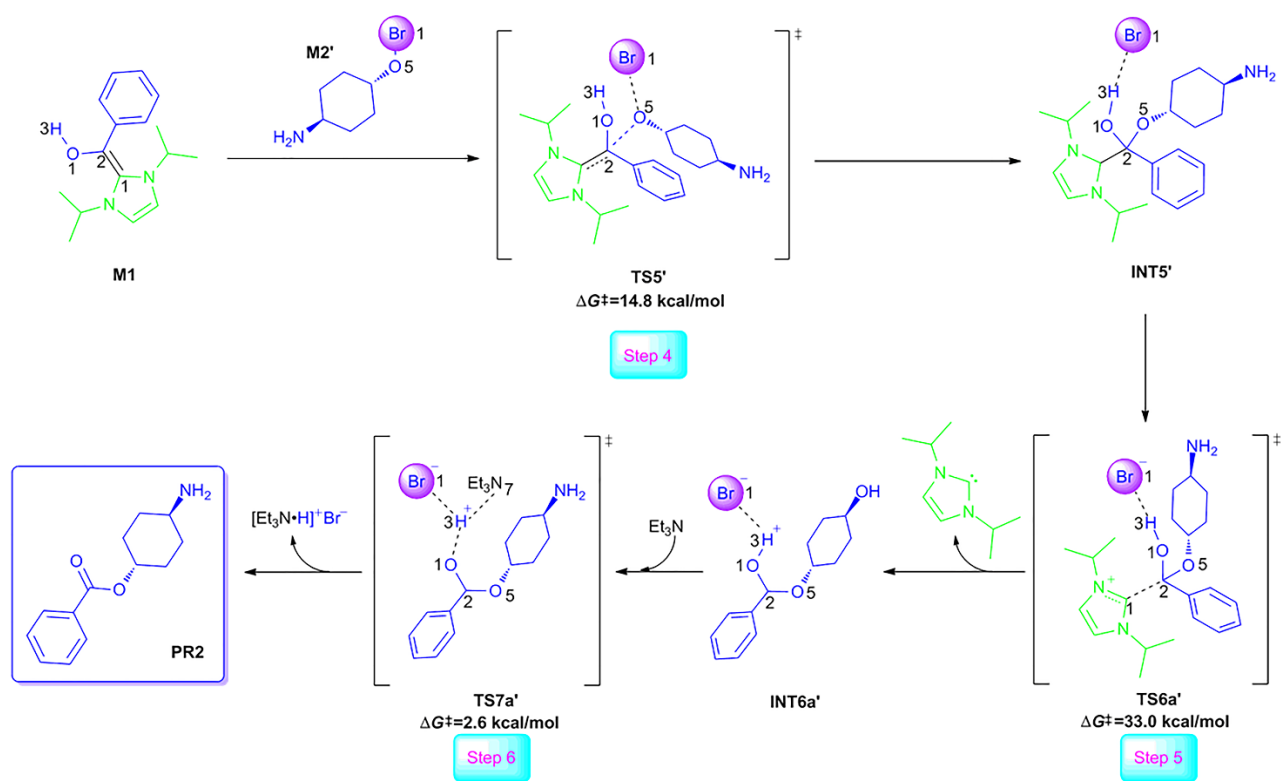

**Scheme S12** The process of removing NHC and then removing HBr to generate **PR2**.

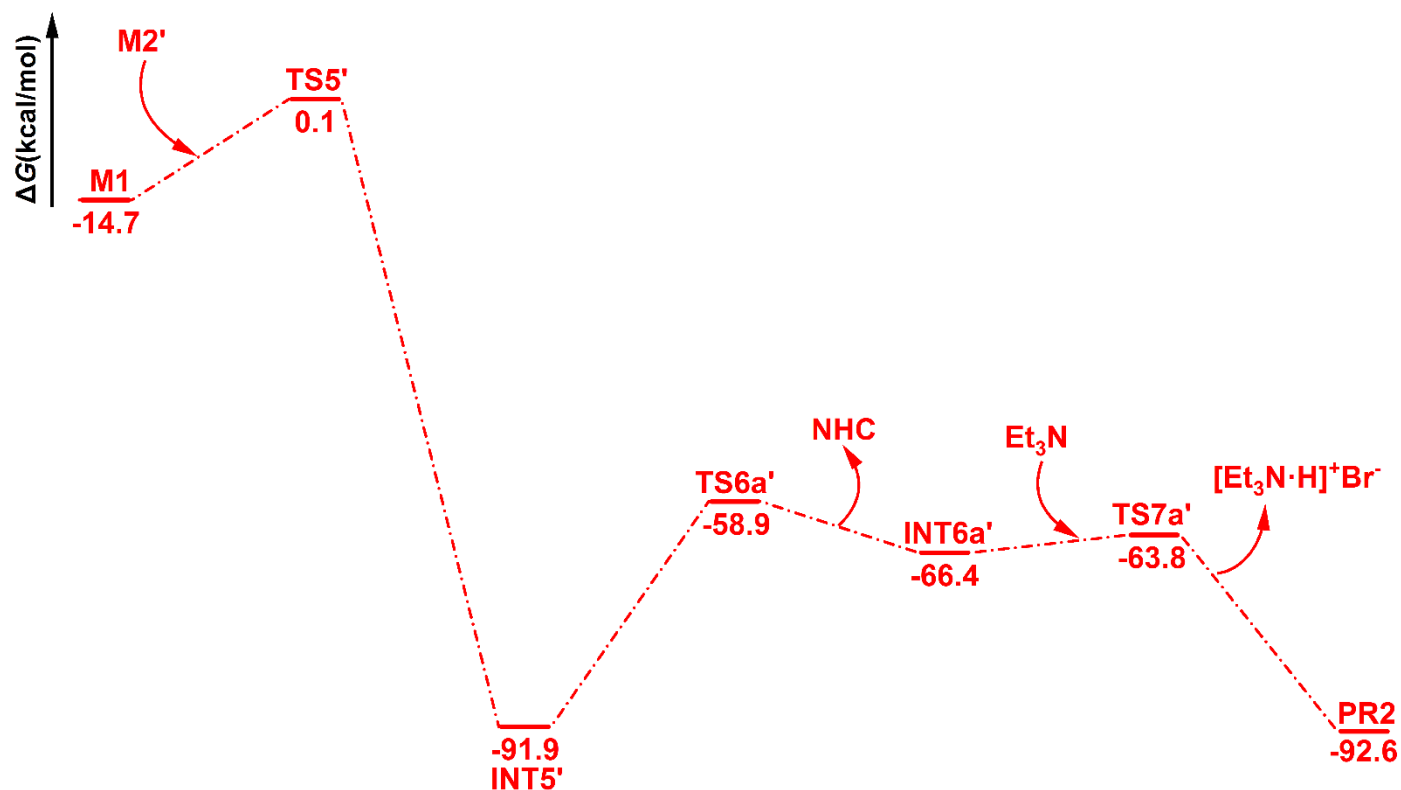

**Fig. S6** Free energy profile for removing NHC and then removing HBr to generate **PR2**. The relative free energies are in kcal/mol.



## Part 6: The AIM analysis details of TS3<sub>b</sub> and TS3'<sub>b</sub>

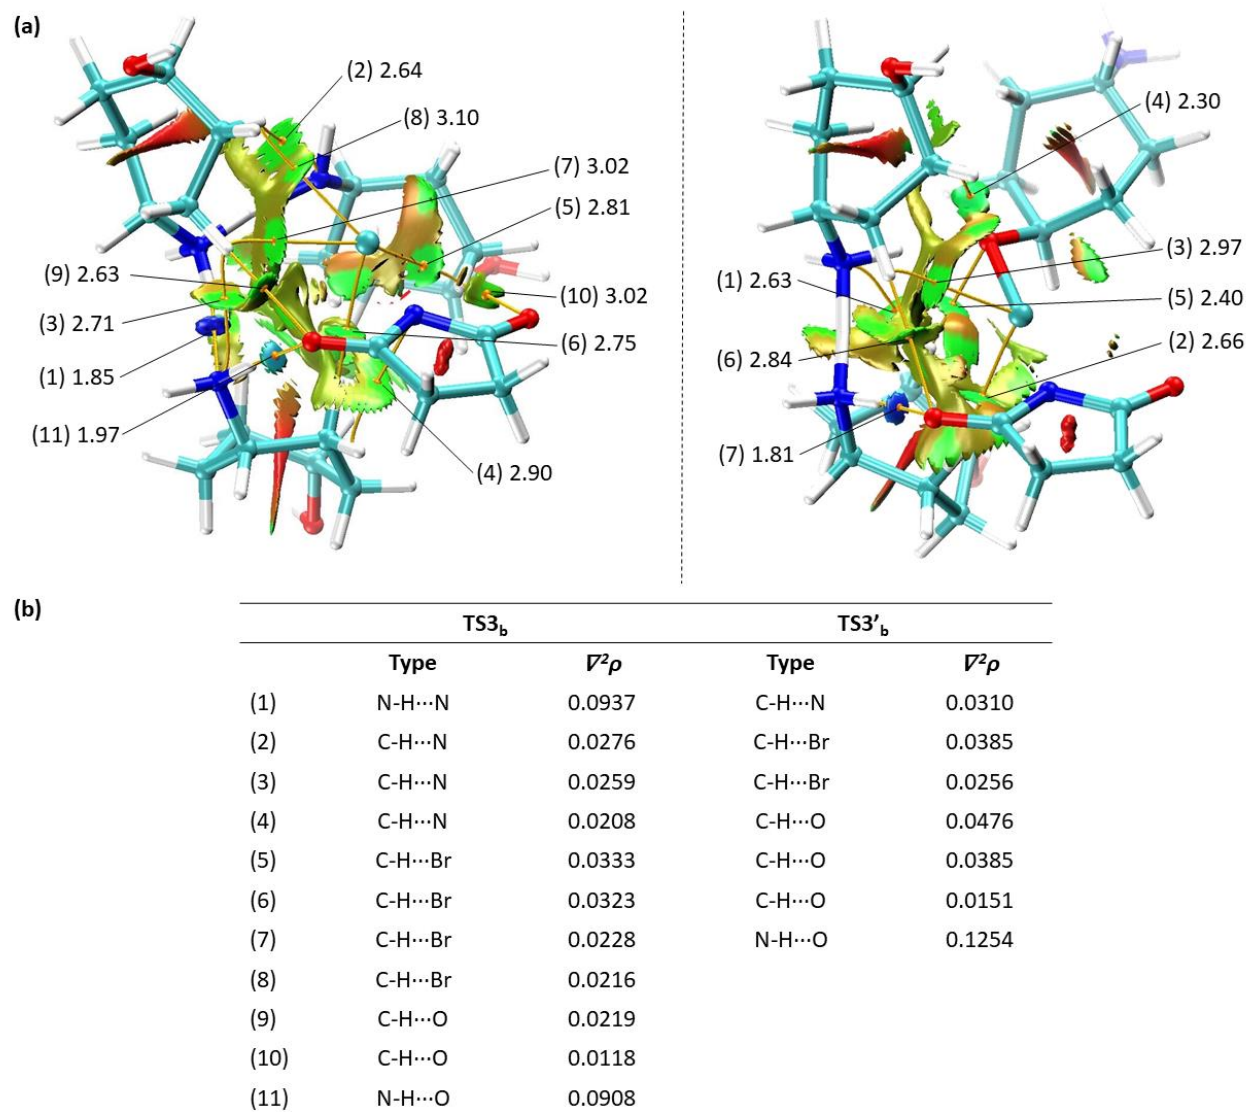

**Fig. S7** (a) AIM analyses of the transition states TS3<sub>b</sub> and TS3'<sub>b</sub> (distance in Å); (b) summary of the Laplacian electron density values.

## Part 7: The NCI analysis details of TS5 and TS5'

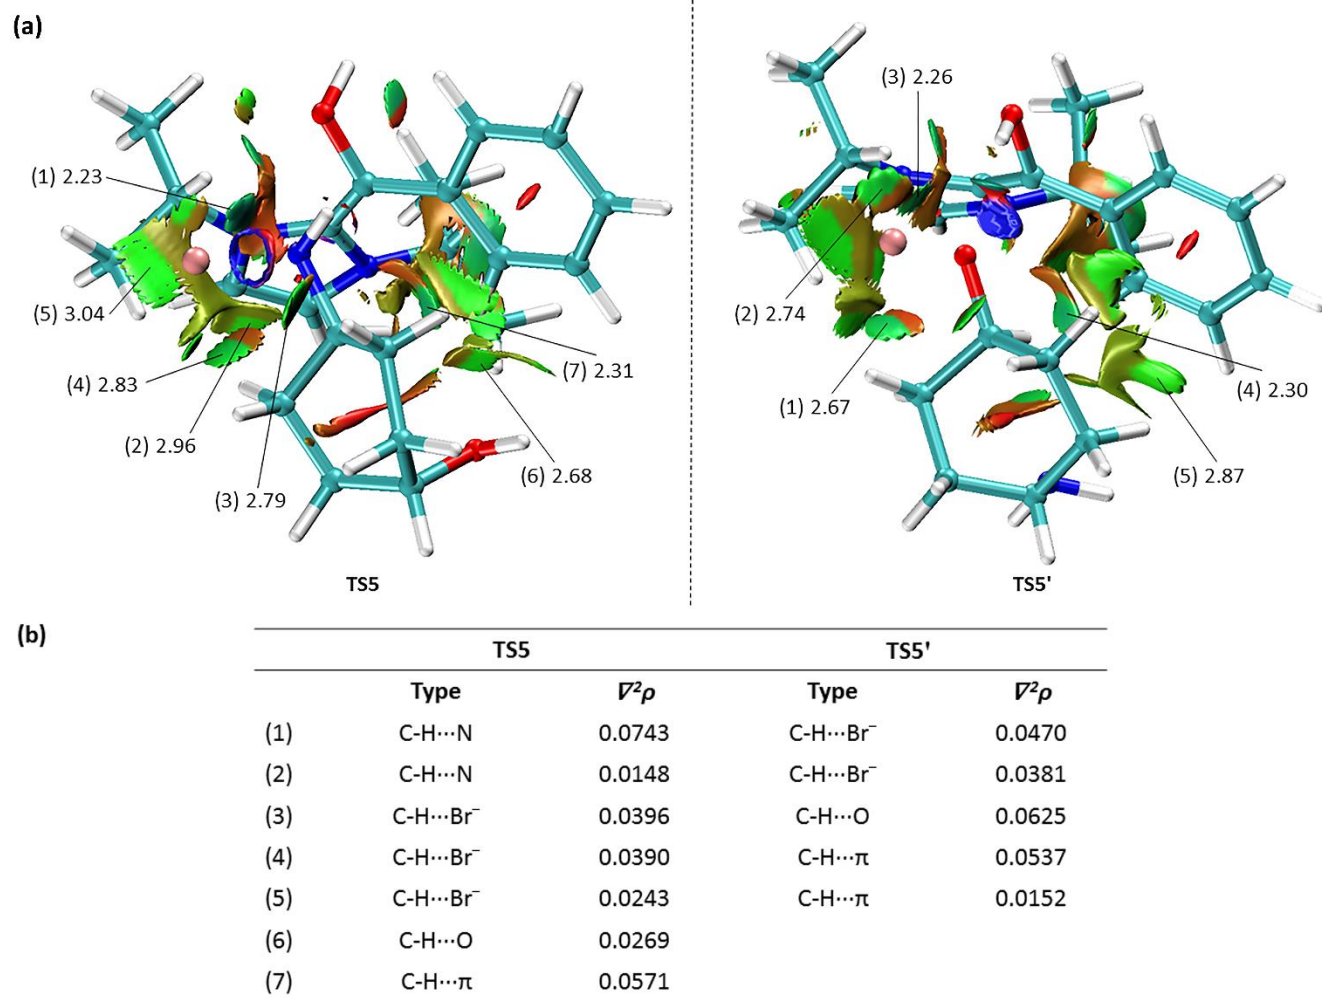

**Fig. S8** (a) NCI analyses of the transition states **TS5** and **TS5'** (distance in Å); (b) summary of the Laplacian electron density ( $\nabla^2\rho$ , a.u.) values from AIM analyses.

## Part 8: List of Cartesian coordinates of all structures involved in this work

### R1

|   |             |             |              |
|---|-------------|-------------|--------------|
| C | -1.99092200 | 0.46985100  | 0.00024800   |
| O | -2.83531200 | -0.39652000 | -0.00037500  |
| H | -2.28105800 | 1.54096300  | 0.00083800   |
| C | -0.52986100 | 0.21204700  | 0.00013400   |
| C | -0.04670700 | -1.10062900 | 0.00019100   |
| C | 0.35738500  | 1.28947600  | -0.00006400  |
| C | 1.32389300  | -1.32833600 | 0.00001500   |
| H | -0.76064300 | -1.91891500 | 0.00022900   |
| C | 1.73156400  | 1.05999600  | -0.00008000  |
| H | -0.03064300 | 2.30570800  | 0.00005700   |
| C | 2.21162000  | -0.24850600 | -0.00006800  |
| H | 1.70676000  | -2.34386700 | 0.00013600   |
| H | 2.42425200  | 1.89525600  | -0.00028200  |
| H | 3.28200100  | -0.43038600 | -0.00023400\ |

### R2

|   |             |             |             |
|---|-------------|-------------|-------------|
| C | 0.73299600  | 1.29958300  | 0.15398700  |
| C | 1.43476700  | 0.08614100  | -0.48412600 |
| C | -0.76059100 | 1.30212100  | -0.17017600 |
| C | 0.47397200  | -1.11452900 | -0.58209700 |
| C | -1.45784000 | 0.09830000  | 0.47479500  |
| C | -0.50122600 | -1.10037600 | 0.59150900  |
| H | 0.87405200  | 1.24372600  | 1.24178900  |
| H | -0.09138300 | -1.06851800 | -1.52028600 |
| H | -0.90747900 | 1.22556000  | -1.25470500 |
| H | 1.20575500  | 2.22887100  | -0.18150300 |
| H | 1.74084900  | 0.36550000  | -1.50592700 |
| H | -1.24078300 | 2.23120900  | 0.14907500  |
| H | 1.05599000  | -2.04254900 | -0.60269500 |
| H | -1.81161700 | 0.37555800  | 1.47953700  |
| H | -1.08684500 | -2.02620200 | 0.63977300  |
| H | 0.06974000  | -1.03415200 | 1.52546400  |
| N | 2.57918100  | -0.28420800 | 0.35402400  |
| H | 3.15535400  | -0.98151900 | -0.10874800 |
| H | 3.17056800  | 0.52292200  | 0.53348100  |
| O | -2.57808400 | -0.19750200 | -0.35418500 |
| H | -3.09625500 | -0.89836600 | 0.05669600  |

### Et<sub>3</sub>N

|   |             |             |             |
|---|-------------|-------------|-------------|
| N | -0.00034500 | -0.00037500 | -0.00517400 |
| C | -1.39223500 | -0.07325000 | 0.43861400  |
| C | -2.23898500 | -0.99956700 | -0.42661300 |
| H | -1.81879500 | 0.93287100  | 0.38716600  |

|   |             |             |             |
|---|-------------|-------------|-------------|
| H | -1.44573600 | -0.38019200 | 1.50149700  |
| H | -3.27407100 | -1.01160900 | -0.07229800 |
| H | -2.22530300 | -0.65455100 | -1.46367500 |
| H | -1.87154900 | -2.02939800 | -0.40896900 |
| C | 0.75858400  | -1.17046600 | 0.43615300  |
| C | 1.98768300  | -1.43488200 | -0.42556900 |
| H | 0.10164500  | -2.04327600 | 0.37737000  |
| H | 1.04689800  | -1.06847700 | 1.50093800  |
| H | 1.68650200  | -1.58402700 | -1.46576500 |
| H | 2.69839500  | -0.60425900 | -0.39554200 |
| H | 2.51124700  | -2.33048900 | -0.07781400 |
| C | 0.63328200  | 1.24108300  | 0.43829100  |
| C | 0.25192200  | 2.43732900  | -0.42586400 |
| H | 1.71783400  | 1.10764000  | 0.38428200  |
| H | 0.39668900  | 1.44060300  | 1.50183000  |
| H | 0.76416700  | 3.33902700  | -0.07705500 |
| H | 0.53596000  | 2.24985100  | -1.46464000 |
| H | -0.82296800 | 2.63743100  | -0.40117200 |

#### NHC H<sup>+</sup>

|   |             |             |             |
|---|-------------|-------------|-------------|
| C | 0.54982700  | -1.31413700 | -0.83760200 |
| C | -0.79687900 | -1.21469900 | -0.65833700 |
| C | 0.14028300  | 0.59125900  | 0.17604800  |
| N | 1.11706600  | -0.17487000 | -0.31243000 |
| H | 1.14524000  | -2.08885800 | -1.29609500 |
| H | -1.59390900 | -1.88713400 | -0.93415800 |
| N | -1.02974200 | -0.01675700 | -0.02154600 |
| C | 2.58179400  | 0.08902400  | -0.25415700 |
| C | 3.13088376  | 0.18617666  | -1.67406810 |
| C | 3.28661993  | -0.97263395 | 0.57665982  |
| H | 2.66606631  | 1.05724525  | 0.24904650  |
| H | 2.61987414  | 0.95835139  | -2.25422031 |
| H | 4.19281760  | 0.43893178  | -1.63476651 |
| H | 3.02361569  | -0.77165860 | -2.19186315 |
| H | 2.85190707  | -1.06715566 | 1.57533549  |
| H | 3.27756525  | -1.94660855 | 0.07662011  |
| H | 4.33257779  | -0.68289031 | 0.69367413  |
| C | -2.36021600 | 0.52689600  | 0.36049600  |
| C | -3.06009600 | -0.44501300 | 1.30267700  |
| C | -3.16786700 | 0.83256500  | -0.89550600 |
| H | -2.13609300 | 1.45701700  | 0.89197800  |
| H | -2.44111600 | -0.67717600 | 2.17239800  |
| H | -3.99260500 | 0.00366000  | 1.65188700  |
| H | -3.31426400 | -1.37748700 | 0.78973700  |
| H | -2.63507100 | 1.52063600  | -1.55610900 |
| H | -3.39381400 | -0.08412400 | -1.44847200 |
| H | -4.11666000 | 1.29204000  | -0.60955600 |

**TS0**

|   |             |             |             |
|---|-------------|-------------|-------------|
| C | 3.60633600  | 0.54093400  | 0.26904400  |
| C | 2.87012900  | 1.68478600  | 0.32662000  |
| C | 1.46973900  | 0.00194000  | -0.21423500 |
| N | 2.72365400  | -0.47412300 | -0.06226800 |
| H | 4.65875200  | 0.37409700  | 0.43414200  |
| H | 3.16954000  | 2.69938600  | 0.54829000  |
| N | 1.57337100  | 1.33004500  | 0.03223400  |
| C | 3.08641400  | -1.88982700 | -0.21786700 |
| C | 3.59817900  | -2.45272600 | 1.11011700  |
| C | 4.09259000  | -2.06214200 | -1.35435400 |
| H | 2.14273500  | -2.38523700 | -0.48425600 |
| H | 2.85433400  | -2.31484200 | 1.90247600  |
| H | 3.80475500  | -3.51693900 | 1.00195200  |
| H | 4.52591500  | -1.95333800 | 1.41162600  |
| H | 3.70670200  | -1.63089100 | -2.28339900 |
| H | 5.04167800  | -1.57409400 | -1.10582600 |
| H | 4.29442100  | -3.11754100 | -1.51257400 |
| C | 0.42445500  | 2.24036900  | -0.05878200 |
| C | 0.52709300  | 3.09671300  | -1.31745200 |
| C | 0.29977700  | 3.08137900  | 1.20733600  |
| H | -0.43796800 | 1.57812600  | -0.14861100 |
| H | 0.59632400  | 2.47031700  | -2.21119200 |
| H | -0.35475100 | 3.74095400  | -1.40518600 |
| H | 1.41065900  | 3.74498000  | -1.27747000 |
| H | 0.30724400  | 2.44620700  | 2.10343500  |
| H | 1.12061700  | 3.79830700  | 1.29210400  |
| H | -0.62825700 | 3.64932400  | 1.18651200  |
| N | -2.98526600 | -0.49866800 | 0.16168200  |
| C | -3.32348200 | 0.92900700  | -0.11856600 |
| C | -3.14614800 | 1.29240000  | -1.58828700 |
| H | -2.65471000 | 1.53153400  | 0.49981300  |
| H | -4.35097400 | 1.10731300  | 0.23346300  |
| H | -3.19756700 | 2.38921400  | -1.67743300 |
| H | -2.15532600 | 0.95817000  | -1.94772300 |
| H | -3.92752000 | 0.87186000  | -2.23907800 |
| C | -3.99602100 | -1.42601500 | -0.44035600 |
| C | -3.57868400 | -2.89022500 | -0.35992300 |
| H | -4.09520400 | -1.13375700 | -1.48377400 |
| H | -4.95712300 | -1.24414400 | 0.05278000  |
| H | -2.53203800 | -3.01005900 | -0.65429200 |
| H | -3.71476400 | -3.31317900 | 0.64037100  |
| H | -4.19763400 | -3.47479600 | -1.04486200 |
| C | -2.79174900 | -0.76005400 | 1.61799300  |
| C | -1.59143500 | -0.03206100 | 2.19843200  |

|   |             |             |             |
|---|-------------|-------------|-------------|
| H | -2.63778900 | -1.83688900 | 1.72596400  |
| H | -3.71982400 | -0.49880300 | 2.14032300  |
| H | -1.40679100 | -0.40504200 | 3.21240500  |
| H | -0.68848800 | -0.21982000 | 1.59606300  |
| H | -1.74598700 | 1.05169400  | 2.28649700  |
| H | 0.25918400  | -0.63872600 | -0.59820600 |
| O | -0.77452800 | -1.09411400 | -0.90867600 |
| H | -0.77545100 | -1.27786000 | -1.85560200 |
| H | -1.98394100 | -0.74026400 | -0.34918500 |

**PRO**

|   |             |             |             |
|---|-------------|-------------|-------------|
| C | 3.35574700  | -0.26854900 | 0.60183600  |
| C | 3.08880800  | 1.05866800  | 0.63708600  |
| C | 1.36288600  | 0.04869100  | -0.43458700 |
| N | 2.29099000  | -0.86163400 | -0.05156200 |
| H | 4.19962100  | -0.82100300 | 0.97999500  |
| H | 3.65568900  | 1.87455600  | 1.05336100  |
| N | 1.87090900  | 1.22638200  | 0.00324800  |
| C | 2.18135900  | -2.30138900 | -0.32833300 |
| C | 2.23686800  | -3.10018200 | 0.96945600  |
| C | 3.25624900  | -2.73429700 | -1.31943400 |
| H | 1.19837200  | -2.41895600 | -0.78968300 |
| H | 1.49123300  | -2.74076400 | 1.68097900  |
| H | 2.04316400  | -4.15373900 | 0.76138600  |
| H | 3.22401400  | -3.02431600 | 1.43245800  |
| H | 3.19414500  | -2.14773700 | -2.23762000 |
| H | 4.25271900  | -2.60624400 | -0.88869100 |
| H | 3.12679900  | -3.78917200 | -1.56742200 |
| C | 1.20822900  | 2.52298500  | -0.19138500 |
| C | 2.05613500  | 3.42729900  | -1.07944400 |
| C | 0.89421800  | 3.16901500  | 1.15405500  |
| H | 0.27891100  | 2.27865400  | -0.71096200 |
| H | 2.27406500  | 2.93870200  | -2.03046300 |
| H | 1.52104100  | 4.35753100  | -1.27739200 |
| H | 3.00043100  | 3.67705000  | -0.58911100 |
| H | 0.29028900  | 2.50768000  | 1.77970800  |
| H | 1.81398900  | 3.40639200  | 1.69428100  |
| H | 0.34921100  | 4.10206900  | 0.99885700  |
| N | -2.84661000 | -0.23590800 | 0.14389800  |
| C | -2.22121800 | 0.98921500  | 0.74548500  |
| C | -2.45564300 | 2.24630500  | -0.07421000 |
| H | -1.15198900 | 0.77672000  | 0.79907600  |
| H | -2.61178500 | 1.08716800  | 1.76085700  |
| H | -1.82191500 | 3.03873000  | 0.32625100  |
| H | -2.18374700 | 2.08927800  | -1.12124300 |
| H | -3.48691900 | 2.59310000  | -0.02187100 |
| C | -4.27647000 | -0.01638900 | -0.24961600 |

|   |             |             |             |
|---|-------------|-------------|-------------|
| C | -4.92549200 | -1.24991000 | -0.85473800 |
| H | -4.27477000 | 0.79063000  | -0.97897400 |
| H | -4.80491200 | 0.32441100  | 0.64390200  |
| H | -4.30147500 | -1.67358100 | -1.64514000 |
| H | -5.13421200 | -2.02045500 | -0.11381100 |
| H | -5.87396400 | -0.95017100 | -1.30089900 |
| C | -2.69377500 | -1.42897100 | 1.04192900  |
| C | -1.25740800 | -1.67582400 | 1.47118200  |
| H | -3.05827400 | -2.28577200 | 0.47885300  |
| H | -3.35442100 | -1.26691900 | 1.89670800  |
| H | -1.21316700 | -2.64981900 | 1.96009300  |
| H | -0.59226700 | -1.69784600 | 0.60510600  |
| H | -0.89247100 | -0.92941200 | 2.17711700  |
| H | -0.10291500 | -0.31609900 | -1.33849100 |
| O | -0.98258500 | -0.59061500 | -1.77913500 |
| H | -0.98302300 | -0.22219200 | -2.66743400 |
| H | -2.28078200 | -0.42542900 | -0.72148300 |

### TS0-1

|   |             |             |             |
|---|-------------|-------------|-------------|
| C | 0.40785600  | -2.88090700 | -0.08951000 |
| C | -0.93822000 | -2.71355100 | -0.11650300 |
| C | -0.01303000 | -0.66168300 | -0.01887400 |
| N | 0.94817200  | -1.61175200 | -0.02521900 |
| H | 1.00855800  | -3.76983700 | -0.10986600 |
| H | -1.73366900 | -3.44495200 | -0.16153500 |
| N | -1.16853100 | -1.35944700 | -0.07111100 |
| C | 2.39949300  | -1.33086600 | 0.02750000  |
| C | 3.03053800  | -1.57708200 | -1.33854300 |
| C | 3.06097500  | -2.14652400 | 1.13904900  |
| H | 2.46505000  | -0.26990300 | 0.28483300  |
| H | 2.51480900  | -0.99549100 | -2.11585900 |
| H | 4.07963200  | -1.28881200 | -1.31854200 |
| H | 2.97005600  | -2.63828700 | -1.60435400 |
| H | 2.56560000  | -1.99562100 | 2.10116700  |
| H | 3.05651700  | -3.21536200 | 0.90457400  |
| H | 4.10864000  | -1.84301900 | 1.23383000  |
| C | -2.51037800 | -0.74847100 | -0.00252400 |
| C | -3.20224600 | -1.14210700 | 1.30537200  |
| C | -3.33362200 | -1.12454400 | -1.23043000 |
| H | -2.33043600 | 0.33120600  | -0.00205700 |
| H | -2.59022800 | -0.86914800 | 2.17147800  |
| H | -4.16005100 | -0.62977300 | 1.38305900  |
| H | -3.39127100 | -2.22147900 | 1.33961600  |
| H | -2.81091800 | -0.86833300 | -2.15224100 |
| H | -3.55044100 | -2.19253200 | -1.24508500 |
| H | -4.28829600 | -0.59258300 | -1.20738600 |
| N | 0.15407500  | 2.08479600  | 0.05475400  |

|   |             |            |             |
|---|-------------|------------|-------------|
| C | -0.82689300 | 2.51259000 | 1.08953000  |
| C | -0.70016100 | 1.73322100 | 2.40204600  |
| H | -1.83403900 | 2.35772500 | 0.66799800  |
| H | -0.70794800 | 3.60193300 | 1.24552100  |
| H | -1.53752600 | 2.02830200 | 3.05177400  |
| H | -0.76897500 | 0.64073700 | 2.23283600  |
| H | 0.24253100  | 1.96018700 | 2.94962100  |
| C | 1.54388200  | 2.38206800 | 0.53161600  |
| C | 2.62192100  | 2.27185500 | -0.54182700 |
| H | 1.74392500  | 1.67918600 | 1.34076700  |
| H | 1.54934700  | 3.39517500 | 0.96465700  |
| H | 2.52270400  | 1.35538300 | -1.12733700 |
| H | 2.61787200  | 3.12020100 | -1.21826800 |
| H | 3.59763700  | 2.24193500 | -0.04656000 |
| C | -0.14419600 | 2.70953600 | -1.26139500 |
| C | -1.44123600 | 2.19735100 | -1.89478300 |
| H | 0.68303600  | 2.46289500 | -1.93538400 |
| H | -0.16021300 | 3.79596100 | -1.14374300 |
| H | -1.52163900 | 2.61663300 | -2.89465000 |

**PR0-1**

|   |             |             |             |
|---|-------------|-------------|-------------|
| C | -3.04264800 | 0.90204600  | 0.46790400  |
| C | -2.30029800 | 2.01734600  | 0.29029900  |
| C | -0.92220800 | 0.22421200  | -0.00601800 |
| N | -2.19120800 | -0.17250300 | 0.28876700  |
| H | -4.08750500 | 0.77801400  | 0.70032000  |
| H | -2.57208900 | 3.05718500  | 0.35159700  |
| N | -1.02252300 | 1.58096500  | -0.00477200 |
| C | -2.72546500 | -1.54634000 | 0.26505300  |
| C | -1.68846900 | -2.57592100 | 0.67231900  |
| C | -3.30237000 | -1.84613700 | -1.11600100 |
| H | -3.53376300 | -1.55100000 | 1.00086500  |
| H | -1.19896200 | -2.30545200 | 1.60848000  |
| H | -2.18017900 | -3.54136800 | 0.80254100  |
| H | -0.93909400 | -2.68523300 | -0.11064800 |
| H | -4.06846600 | -1.11796600 | -1.38855000 |
| H | -2.50675400 | -1.81234500 | -1.86505100 |
| H | -3.74952300 | -2.84187700 | -1.12686000 |
| C | 0.11331000  | 2.48103300  | -0.23832700 |
| C | 0.65883600  | 2.99844700  | 1.08880500  |
| C | -0.26343800 | 3.61310800  | -1.18631700 |
| H | 0.85820800  | 1.85649900  | -0.73227600 |
| H | 0.93685900  | 2.16958500  | 1.74447300  |
| H | 1.53609100  | 3.62679200  | 0.91993800  |
| H | -0.09805200 | 3.60052900  | 1.59823700  |
| H | -0.70566600 | 3.22286500  | -2.10439700 |
| H | -0.96805100 | 4.30612500  | -0.72104600 |



|   |            |             |             |
|---|------------|-------------|-------------|
| H | 0.63415500 | 4.17734200  | -1.44438900 |
| N | 1.91403100 | -0.89576400 | -0.04978700 |
| C | 2.74432500 | -0.15955500 | -1.07415800 |
| C | 3.48916500 | 1.06589200  | -0.56975800 |
| H | 2.05893600 | 0.10327900  | -1.88120200 |
| H | 3.46236600 | -0.88109700 | -1.46778800 |
| H | 3.92824800 | 1.55864600  | -1.43820900 |
| H | 2.84419500 | 1.78716100  | -0.06860300 |
| H | 4.30030000 | 0.79618500  | 0.10592300  |
| C | 2.47987800 | -0.82056900 | 1.33678900  |
| C | 1.55213000 | -1.40503700 | 2.38841600  |
| H | 2.64452300 | 0.23281700  | 1.55169400  |
| H | 3.45019400 | -1.32247900 | 1.31720500  |
| H | 0.56403900 | -0.94395700 | 2.32505500  |
| H | 1.45125100 | -2.48750800 | 2.31603400  |
| H | 1.96851600 | -1.17750500 | 3.37032300  |
| C | 1.72384200 | -2.31902200 | -0.48629600 |
| C | 1.08156200 | -2.42093800 | -1.86075400 |
| H | 1.09771900 | -2.79476300 | 0.26378900  |
| H | 2.70810400 | -2.79147600 | -0.45884700 |

#### TS0-2

|   |             |             |             |
|---|-------------|-------------|-------------|
| C | 0.70759900  | 1.51546400  | -1.17143400 |
| C | 1.07190100  | 0.23146200  | -1.39523800 |
| C | -1.02214600 | 0.20628300  | -0.56237800 |
| N | -0.57137700 | 1.47597300  | -0.65364600 |
| H | 1.25214300  | 2.43087400  | -1.32599200 |
| H | 2.01132400  | -0.18135000 | -1.72315400 |
| N | -0.00007900 | -0.55034900 | -1.02423700 |
| C | -1.31001000 | 2.67238700  | -0.22396800 |
| C | -1.69802400 | 3.52977500  | -1.43321100 |
| C | -0.50063000 | 3.44847000  | 0.81732400  |
| H | -2.21733100 | 2.27956600  | 0.25230600  |
| H | -2.25966100 | 2.94283800  | -2.16857200 |
| H | -2.31017900 | 4.36833100  | -1.10913700 |
| H | -0.80073000 | 3.93707200  | -1.92030500 |
| H | -0.21189500 | 2.79443400  | 1.64838200  |
| H | 0.40814400  | 3.87912300  | 0.37572000  |
| H | -1.10507900 | 4.27177000  | 1.20648500  |
| C | 0.04418500  | -2.02393500 | -0.99937800 |
| C | 0.88583100  | -2.48447100 | 0.18794800  |
| C | 0.55500300  | -2.56883700 | -2.32741900 |
| H | -0.99062200 | -2.33947000 | -0.86436500 |
| H | 0.42379200  | -2.18538500 | 1.13203000  |
| H | 0.99613000  | -3.56941600 | 0.17283200  |
| H | 1.87496000  | -2.02633600 | 0.13627300  |
| H | -0.01161300 | -2.16036500 | -3.16696800 |

|   |             |             |             |
|---|-------------|-------------|-------------|
| H | 1.61319200  | -2.33548600 | -2.47025200 |
| H | 0.45974100  | -3.65476200 | -2.33657600 |
| N | -3.36322100 | -0.72124100 | 0.47082200  |
| C | -2.87258600 | -1.74099200 | 1.43943400  |
| C | -2.00948900 | -1.16367700 | 2.55367600  |
| H | -2.28581800 | -2.46155200 | 0.86757600  |
| H | -3.73667500 | -2.27330400 | 1.84690900  |
| H | -1.53361600 | -1.98915800 | 3.08900200  |
| H | -1.21585500 | -0.51849600 | 2.15651300  |
| H | -2.59338300 | -0.60199300 | 3.27981000  |
| C | -4.00776200 | 0.41534900  | 1.18114900  |
| C | -4.70421900 | 1.40955500  | 0.26112600  |
| H | -3.22126400 | 0.91708000  | 1.74488100  |
| H | -4.72026300 | 0.00458400  | 1.91040400  |
| H | -4.09358900 | 1.65682200  | -0.60745500 |
| H | -5.67049900 | 1.04079800  | -0.09212800 |
| H | -4.88940900 | 2.33073600  | 0.81770600  |
| C | -4.27439500 | -1.32611600 | -0.53729000 |
| C | -3.65410500 | -2.42071500 | -1.38409800 |
| H | -4.60135100 | -0.52009500 | -1.19469000 |
| H | -5.16470300 | -1.69760300 | -0.00833000 |

**PR0-2**

|   |             |             |             |
|---|-------------|-------------|-------------|
| C | 1.09284300  | 0.10448000  | -2.17844200 |
| C | 0.76610800  | 1.37644400  | -1.86026800 |
| C | -0.74702100 | 0.00889500  | -0.84725100 |
| N | 0.16454600  | -0.70891200 | -1.55803800 |
| H | 1.89865100  | -0.28743300 | -2.77995800 |
| H | 1.23230700  | 2.30782800  | -2.13465300 |
| N | -0.34699900 | 1.29321800  | -1.04543300 |
| C | 0.30320900  | -2.17792300 | -1.57548900 |
| C | -0.95192700 | -2.86230400 | -2.09174000 |
| C | 0.72177900  | -2.68329600 | -0.20103700 |
| H | 1.11826600  | -2.36789500 | -2.28000000 |
| H | -1.27660700 | -2.43085700 | -3.04114300 |
| H | -0.74564500 | -3.92517100 | -2.24093500 |
| H | -1.76167600 | -2.77760700 | -1.36837700 |
| H | 1.60462200  | -2.15009300 | 0.15409400  |
| H | -0.08499400 | -2.52839900 | 0.52006900  |
| H | 0.94582100  | -3.75010700 | -0.24801500 |
| C | -1.00202500 | 2.45920200  | -0.44176700 |
| C | -1.90931000 | 3.14496900  | -1.45577400 |
| C | 0.02496100  | 3.41384200  | 0.15888700  |
| H | -1.60202900 | 2.04967500  | 0.37190200  |
| H | -2.64983000 | 2.44651900  | -1.85152900 |
| H | -2.43279400 | 3.98352300  | -0.99019800 |
| H | -1.32242300 | 3.53148500  | -2.29508000 |

|   |             |             |             |
|---|-------------|-------------|-------------|
| H | 0.70632200  | 2.87634600  | 0.82302500  |
| H | 0.60600300  | 3.91399100  | -0.61970000 |
| H | -0.49021700 | 4.18133800  | 0.73301500  |
| N | -3.24457600 | -0.42431500 | 0.76766400  |
| C | -3.45534000 | 0.65312800  | 1.79640100  |
| C | -4.18023600 | 1.88996000  | 1.29041600  |
| H | -2.46799200 | 0.91144600  | 2.17285500  |
| H | -4.01641900 | 0.19543000  | 2.61402400  |
| H | -4.08218900 | 2.66622500  | 2.05266500  |
| H | -3.75826600 | 2.27640900  | 0.36260100  |
| H | -5.24418600 | 1.70667100  | 1.13672400  |
| C | -4.45129300 | -0.59671600 | -0.11007800 |
| C | -4.27862900 | -1.63969300 | -1.19509500 |
| H | -4.64048400 | 0.37236800  | -0.57025100 |
| H | -5.29076100 | -0.83141400 | 0.55118300  |
| H | -3.41802500 | -1.40073100 | -1.82378600 |
| H | -4.17170100 | -2.65256900 | -0.80003900 |
| H | -5.16980000 | -1.62284200 | -1.82354300 |
| C | -2.84726500 | -1.71492800 | 1.42376100  |
| C | -1.72770600 | -1.54040200 | 2.43738400  |
| H | -2.52587000 | -2.37936700 | 0.62422300  |
| H | -3.74887000 | -2.13335700 | 1.88300900  |

### TS0-3

|   |             |             |             |
|---|-------------|-------------|-------------|
| C | 1.31342100  | -1.61480400 | -0.34279400 |
| C | 0.84072600  | -1.81207000 | 0.91104900  |
| C | -0.02322200 | 0.12887600  | 0.15857200  |
| N | 0.77314800  | -0.42664800 | -0.78366500 |
| H | 2.00455700  | -2.19514600 | -0.92793600 |
| H | 1.02076400  | -2.61379000 | 1.60631500  |
| N | 0.03242700  | -0.73209900 | 1.19787100  |
| C | 0.94465500  | 0.12737200  | -2.14113900 |
| C | -0.25788300 | -0.25904700 | -2.99666800 |
| C | 2.26165700  | -0.32839600 | -2.75566200 |
| H | 0.97487900  | 1.21121700  | -2.00507600 |
| H | -1.19274700 | 0.02724400  | -2.50997600 |
| H | -0.19956000 | 0.22549000  | -3.97366900 |
| H | -0.27422900 | -1.34184800 | -3.14809600 |
| H | 3.08361500  | -0.23653300 | -2.04285400 |
| H | 2.20097300  | -1.37015000 | -3.08158000 |
| H | 2.47513700  | 0.27687100  | -3.63757400 |
| C | -0.74720100 | -0.58780600 | 2.43823500  |
| C | 0.14543300  | -0.75634300 | 3.66187700  |
| C | -1.92501700 | -1.55561800 | 2.41795000  |
| H | -1.12870000 | 0.43372400  | 2.40723500  |
| H | 1.00673500  | -0.08628200 | 3.62234200  |
| H | -0.42649400 | -0.53464500 | 4.56417100  |

|   |             |             |             |
|---|-------------|-------------|-------------|
| H | 0.50774400  | -1.78315200 | 3.74854700  |
| H | -2.52315900 | -1.40466600 | 1.51597500  |
| H | -1.57186000 | -2.59052900 | 2.43324800  |
| H | -2.55419000 | -1.39757900 | 3.29649100  |
| N | -1.01163200 | 2.65764300  | 0.44859600  |
| C | -0.61510200 | 3.06292100  | 1.82693900  |
| C | 0.84742500  | 2.80072800  | 2.15704200  |
| H | -1.25516700 | 2.52295600  | 2.52376800  |
| H | -0.84860100 | 4.12744400  | 1.93962600  |
| H | 1.00896900  | 3.00461300  | 3.21673600  |
| H | 1.12603500  | 1.76289200  | 1.96251600  |
| H | 1.52130900  | 3.44648900  | 1.59336900  |
| C | -0.21908300 | 3.43053900  | -0.54943700 |
| C | -0.72593300 | 3.32264100  | -1.98202500 |
| H | 0.80052300  | 3.03862900  | -0.48789600 |
| H | -0.18607800 | 4.47959200  | -0.23557900 |
| H | -0.97979600 | 2.29378900  | -2.24748000 |
| H | -1.60059400 | 3.94817500  | -2.15893500 |
| H | 0.05988700  | 3.66129800  | -2.65923500 |
| C | -2.48409000 | 2.80285200  | 0.28543000  |
| C | -3.27071200 | 1.70173700  | 0.98483300  |
| H | -2.70985800 | 2.76180100  | -0.77703600 |
| H | -2.77413000 | 3.79726600  | 0.64411100  |

### PR0-3

|   |             |             |             |
|---|-------------|-------------|-------------|
| C | 1.27663700  | -1.78204000 | -0.40479400 |
| C | 0.84136500  | -1.91987300 | 0.87022100  |
| C | 0.02081000  | 0.04529100  | 0.08181600  |
| N | 0.76944100  | -0.58223500 | -0.86210400 |
| H | 1.90667300  | -2.42143500 | -0.99868200 |
| H | 1.01151000  | -2.70583500 | 1.58687500  |
| N | 0.08803100  | -0.79521700 | 1.14480600  |
| C | 0.92201500  | -0.06759000 | -2.23341500 |
| C | -0.27873300 | -0.49146000 | -3.07331700 |
| C | 2.24274300  | -0.51106200 | -2.84949600 |
| H | 0.93106900  | 1.01989500  | -2.12903500 |
| H | -1.21042800 | -0.16865600 | -2.60334600 |
| H | -0.21473600 | -0.05456700 | -4.07224500 |
| H | -0.30388600 | -1.58096000 | -3.16910500 |
| H | 3.07725700  | -0.32505800 | -2.16984800 |
| H | 2.22463300  | -1.57561100 | -3.09716700 |
| H | 2.40402300  | 0.04018500  | -3.77713900 |
| C | -0.62226900 | -0.57076600 | 2.41078700  |
| C | 0.32729900  | -0.70086700 | 3.59572100  |
| C | -1.82280700 | -1.50657500 | 2.50359700  |
| H | -0.98065200 | 0.45827100  | 2.35021900  |
| H | 1.19555200  | -0.04901800 | 3.47488600  |

|   |             |             |             |
|---|-------------|-------------|-------------|
| H | -0.19386900 | -0.42229900 | 4.51301000  |
| H | 0.67733600  | -1.72963700 | 3.70884300  |
| H | -2.46165300 | -1.38770500 | 1.62478800  |
| H | -1.49349100 | -2.54836800 | 2.55555800  |
| H | -2.40303200 | -1.28301400 | 3.40150300  |
| N | -1.05892000 | 2.73123700  | 0.38799200  |
| C | -0.62276700 | 3.15615800  | 1.75807700  |
| C | 0.84465100  | 2.88254300  | 2.04161000  |
| H | -1.25041500 | 2.62294400  | 2.46977300  |
| H | -0.85413900 | 4.22006200  | 1.84546100  |
| H | 1.02899400  | 3.05845800  | 3.10221100  |
| H | 1.10536600  | 1.84618300  | 1.81499800  |
| H | 1.50285000  | 3.54110500  | 1.47499000  |
| C | -0.28900600 | 3.46882100  | -0.66526100 |
| C | -0.78988200 | 3.21728200  | -2.07969800 |
| H | 0.74101800  | 3.12049000  | -0.56889200 |
| H | -0.31475700 | 4.53178000  | -0.41505500 |
| H | -1.00315700 | 2.15876900  | -2.24754900 |
| H | -1.68421000 | 3.79412600  | -2.31325800 |
| H | -0.00912600 | 3.51695300  | -2.78015000 |
| C | -2.54513500 | 2.85899400  | 0.25845900  |
| C | -3.28598400 | 1.75541100  | 0.99825000  |
| H | -2.79091000 | 2.80585100  | -0.79862300 |
| H | -2.81841300 | 3.85405700  | 0.61741100  |

#### TS0-4

|   |             |             |             |
|---|-------------|-------------|-------------|
| C | 2.58631600  | 1.05698200  | -1.09618600 |
| C | 1.70572900  | 2.07510800  | -1.23491000 |
| C | 0.51737100  | 0.21181700  | -0.76507600 |
| N | 1.83809400  | -0.06991000 | -0.81732600 |
| H | 3.66269300  | 1.04582300  | -1.15477900 |
| H | 1.86536100  | 3.12142000  | -1.43766300 |
| N | 0.45450400  | 1.53428200  | -1.03411600 |
| C | 2.42382400  | -1.37100000 | -0.48360100 |
| C | 3.26735300  | -1.25401300 | 0.78156800  |
| C | 3.19839700  | -1.93107700 | -1.67213600 |
| H | 1.56833700  | -2.01786200 | -0.27685500 |
| H | 2.67344600  | -0.78161700 | 1.56457100  |
| H | 3.58622700  | -2.24773300 | 1.10833100  |
| H | 4.16500100  | -0.65517200 | 0.59531900  |
| H | 2.56166000  | -1.99739900 | -2.55878700 |
| H | 4.05890500  | -1.29938500 | -1.91388700 |
| H | 3.57518000  | -2.92932200 | -1.43515800 |
| C | -0.79346100 | 2.30257000  | -0.97986700 |
| C | -1.28629400 | 2.62332100  | -2.38750100 |
| C | -0.61798100 | 3.54044200  | -0.10600400 |
| H | -1.49430700 | 1.63914200  | -0.47207200 |

|   |             |             |             |
|---|-------------|-------------|-------------|
| H | -1.40508400 | 1.71160600  | -2.98123700 |
| H | -2.24867400 | 3.14091400  | -2.34129100 |
| H | -0.57565500 | 3.27720600  | -2.90402900 |
| H | -0.08880700 | 3.25873200  | 0.80602100  |
| H | -0.07631300 | 4.33138600  | -0.63642700 |
| H | -1.60071800 | 3.93853800  | 0.15968800  |
| N | -1.65701900 | -1.42311900 | -0.33840100 |
| C | -2.42488600 | -1.08432700 | -1.56476200 |
| C | -1.66770000 | -1.32534400 | -2.86446700 |
| H | -2.68482300 | -0.02523500 | -1.48284600 |
| H | -3.35809800 | -1.66170500 | -1.55059500 |
| H | -2.24608700 | -0.89890100 | -3.68771500 |
| H | -0.68841700 | -0.84134600 | -2.84463900 |
| H | -1.52977600 | -2.38805900 | -3.07376800 |
| C | -1.09723600 | -2.80249100 | -0.42044900 |
| C | -0.45654700 | -3.27956100 | 0.87427200  |
| H | -0.34832800 | -2.78840100 | -1.21905400 |
| H | -1.91029900 | -3.46945500 | -0.73734800 |
| H | 0.18071100  | -2.49399200 | 1.28217300  |
| H | -1.20143800 | -3.54646000 | 1.62576600  |
| H | 0.14502300  | -4.16817800 | 0.66606500  |
| C | -2.47529500 | -1.28378700 | 0.91167300  |
| C | -3.45352500 | -0.12364000 | 0.95036700  |
| H | -1.75313900 | -1.18120700 | 1.72259000  |
| H | -3.02611700 | -2.22698200 | 1.02885100  |
| H | -3.91591600 | -0.12500700 | 1.94042300  |
| H | -2.94362500 | 0.82981900  | 0.84847000  |

**PR0-4**

|   |             |             |             |
|---|-------------|-------------|-------------|
| C | -3.17768600 | 0.19339300  | 0.37628800  |
| C | -2.88830500 | -1.12434400 | 0.30095400  |
| C | -1.15072000 | -0.00174200 | -0.67216100 |
| N | -2.11364700 | 0.85391600  | -0.22562100 |
| H | -4.01675300 | 0.70800800  | 0.81406600  |
| H | -3.43587400 | -1.98304900 | 0.65453000  |
| N | -1.66688100 | -1.21811800 | -0.33885100 |
| C | -2.00904000 | 2.30836700  | -0.30386000 |
| C | -1.78609200 | 2.90887200  | 1.08017700  |
| C | -3.22942200 | 2.90475800  | -1.00822700 |
| H | -1.12553400 | 2.48253300  | -0.92362500 |
| H | -0.92310800 | 2.44144700  | 1.56649400  |
| H | -1.62908600 | 3.99124000  | 1.00825500  |
| H | -2.66620200 | 2.73803200  | 1.71435200  |
| H | -3.38018300 | 2.44311800  | -1.98418900 |
| H | -4.13591700 | 2.76371400  | -0.40981900 |
| H | -3.08829800 | 3.98440500  | -1.14272500 |
| C | -1.00152500 | -2.48971600 | -0.62958600 |

|   |             |             |             |
|---|-------------|-------------|-------------|
| C | -1.61459500 | -3.13405100 | -1.86631000 |
| C | -1.03462000 | -3.41185000 | 0.58526600  |
| H | 0.03831800  | -2.21671100 | -0.82564700 |
| H | -1.55309600 | -2.46351100 | -2.73139500 |
| H | -1.09394400 | -4.06825300 | -2.10910000 |
| H | -2.67275300 | -3.37366900 | -1.69205300 |
| H | -0.73396400 | -2.85777100 | 1.48070500  |
| H | -2.03467500 | -3.83172300 | 0.73833800  |
| H | -0.34671500 | -4.24657000 | 0.43090500  |
| N | 2.08411400  | 0.51175500  | -0.88253100 |
| C | 2.37629600  | -0.66291100 | -1.76862600 |
| C | 1.37271400  | -0.85194100 | -2.89692500 |
| H | 2.37241900  | -1.51949800 | -1.09134500 |
| H | 3.38742900  | -0.52407600 | -2.15332900 |
| H | 1.51112100  | -1.85071500 | -3.31424900 |
| H | 0.35309400  | -0.75701900 | -2.51745400 |
| H | 1.52252400  | -0.13040900 | -3.70178800 |
| C | 1.64915800  | 1.72177000  | -1.66118600 |
| C | 1.48156100  | 2.95247300  | -0.78373000 |
| H | 0.69562600  | 1.44390800  | -2.10680100 |
| H | 2.39401600  | 1.87953700  | -2.45011300 |
| H | 0.90289500  | 2.69687700  | 0.11145400  |
| H | 2.43861400  | 3.37589700  | -0.47129200 |
| H | 0.94508700  | 3.71541700  | -1.35023300 |
| C | 3.24868500  | 0.83545700  | 0.01229200  |
| C | 3.92786600  | -0.35340600 | 0.67111500  |
| H | 2.85423400  | 1.49840200  | 0.77807000  |
| H | 3.95667900  | 1.39043700  | -0.62105700 |
| H | 4.74211200  | 0.04774000  | 1.28771900  |

### TS0-5

|   |             |             |             |
|---|-------------|-------------|-------------|
| C | -3.44322300 | -0.13697800 | -0.61970300 |
| C | -3.02644900 | 1.13458500  | -0.83887200 |
| C | -1.39863400 | 0.07182400  | 0.28977400  |
| N | -2.42763500 | -0.76937900 | 0.07071500  |
| H | -4.35990300 | -0.63049400 | -0.89535700 |
| H | -3.51486900 | 1.95345800  | -1.33946100 |
| N | -1.76920700 | 1.23628200  | -0.27667600 |
| C | -2.46563200 | -2.16647200 | 0.53676700  |
| C | -2.66083400 | -3.11397500 | -0.64099200 |
| C | -3.54321700 | -2.33433800 | 1.60196900  |
| H | -1.48423000 | -2.33579400 | 0.98528200  |
| H | -1.90209600 | -2.95105200 | -1.40821200 |
| H | -2.59019500 | -4.14558200 | -0.29275200 |
| H | -3.64716300 | -2.97758500 | -1.09109400 |
| H | -3.38256400 | -1.64018400 | 2.42818600  |
| H | -4.53460700 | -2.15410700 | 1.17873200  |

|   |             |             |             |
|---|-------------|-------------|-------------|
| H | -3.51959700 | -3.35397900 | 1.98941400  |
| C | -0.94611700 | 2.45758900  | -0.23638900 |
| C | -1.55341100 | 3.46740900  | 0.72998300  |
| C | -0.76594800 | 3.02639600  | -1.63823600 |
| H | 0.01881300  | 2.13030100  | 0.15747900  |
| H | -1.67871000 | 3.02464800  | 1.71985700  |
| H | -0.89586300 | 4.33437300  | 0.81440100  |
| H | -2.52825900 | 3.80909800  | 0.37241300  |
| H | -0.36686300 | 2.27410200  | -2.32199300 |
| H | -1.71415900 | 3.39181300  | -2.03992100 |
| H | -0.07436900 | 3.86979400  | -1.60112900 |
| N | 2.65072800  | -0.68880200 | -0.37605000 |
| C | 2.22756700  | 0.37472600  | -1.34488500 |
| C | 2.61183300  | 1.78018300  | -0.91181700 |
| H | 1.14111600  | 0.29270200  | -1.42160000 |
| H | 2.66024100  | 0.12275200  | -2.31615200 |
| H | 2.09902000  | 2.48835700  | -1.56436200 |
| H | 2.30576200  | 1.98380800  | 0.11759300  |
| H | 3.68212100  | 1.96226400  | -1.00644000 |
| C | 4.06572600  | -0.52015500 | 0.08051700  |
| C | 4.50232100  | -1.58650500 | 1.07154500  |
| H | 4.12312400  | 0.45919800  | 0.55145300  |
| H | 4.69712800  | -0.51318200 | -0.81152900 |
| H | 3.77206700  | -1.69516600 | 1.87723100  |
| H | 4.66037400  | -2.55648200 | 0.60175400  |
| H | 5.44723100  | -1.27282300 | 1.51583200  |
| C | 2.40392800  | -2.06004500 | -0.92624500 |
| C | 0.97565500  | -2.26276100 | -1.40423100 |
| H | 2.61832200  | -2.75971000 | -0.12064100 |
| H | 3.12925200  | -2.22129400 | -1.72774200 |

**PR0-5**

|   |             |             |             |
|---|-------------|-------------|-------------|
| C | -3.45966500 | -0.17870800 | -0.63390200 |
| C | -3.05145900 | 1.09177000  | -0.86899500 |
| C | -1.41041100 | 0.05685900  | 0.29710000  |
| N | -2.44218500 | -0.78991700 | 0.07506300  |
| H | -4.37033000 | -0.68353600 | -0.90994200 |
| H | -3.54328800 | 1.89895000  | -1.38550900 |
| N | -1.79831900 | 1.20895200  | -0.29721900 |
| C | -2.47955500 | -2.17936900 | 0.55580500  |
| C | -2.64351300 | -3.14460100 | -0.61306700 |
| C | -3.57607600 | -2.34788800 | 1.60195100  |
| H | -1.50620400 | -2.33545100 | 1.02604000  |
| H | -1.87123700 | -2.98326300 | -1.36721900 |
| H | -2.57153300 | -4.17208900 | -0.25263600 |
| H | -3.62154800 | -3.02099900 | -1.08486100 |
| H | -3.43871700 | -1.64196500 | 2.42257100  |



|   |             |             |             |
|---|-------------|-------------|-------------|
| H | -4.56137400 | -2.18270900 | 1.15850600  |
| H | -3.55024600 | -3.36248700 | 2.00277900  |
| C | -0.99448700 | 2.44039100  | -0.27262000 |
| C | -1.61804200 | 3.45961500  | 0.67399400  |
| C | -0.81175200 | 2.99221200  | -1.68146200 |
| H | -0.02691800 | 2.13339700  | 0.13121700  |
| H | -1.74204200 | 3.03094200  | 1.67037500  |
| H | -0.97388300 | 4.33785000  | 0.74708400  |
| H | -2.59657000 | 3.78122100  | 0.30765900  |
| H | -0.40062100 | 2.23419400  | -2.35188400 |
| H | -1.76175500 | 3.34003800  | -2.09472400 |
| H | -0.13063900 | 3.84472000  | -1.65444800 |
| N | 2.69064200  | -0.68966300 | -0.37195800 |
| C | 2.20386000  | 0.36700900  | -1.32311200 |
| C | 2.57884300  | 1.77870100  | -0.90502500 |
| H | 1.11751100  | 0.26211800  | -1.35226200 |
| H | 2.60291900  | 0.11868000  | -2.30913800 |
| H | 2.02570300  | 2.47511700  | -1.53692400 |
| H | 2.30658000  | 1.97843700  | 0.13457400  |
| H | 3.64036200  | 1.98261900  | -1.04203100 |
| C | 4.12855600  | -0.50326200 | 0.01045400  |
| C | 4.62485200  | -1.56078500 | 0.98222900  |
| H | 4.19947000  | 0.47970000  | 0.47120300  |
| H | 4.70730200  | -0.49637900 | -0.91583000 |
| H | 3.93876900  | -1.67053800 | 1.82565700  |
| H | 4.76721200  | -2.53166300 | 0.50962700  |
| H | 5.58829400  | -1.23545200 | 1.37514500  |
| C | 2.43125800  | -2.06973900 | -0.90283600 |
| C | 0.98642600  | -2.28867800 | -1.31767900 |
| H | 2.69038900  | -2.76035100 | -0.10300800 |
| H | 3.12421100  | -2.22379000 | -1.73320800 |

### TS0-6

|   |             |             |             |
|---|-------------|-------------|-------------|
| C | -3.36583000 | -1.52496000 | -0.00970100 |
| C | -2.55390500 | -2.19745700 | -0.86321000 |
| C | -1.27069200 | -0.79097300 | 0.33278200  |
| N | -2.55601000 | -0.66686300 | 0.70940700  |
| H | -4.43052100 | -1.58937600 | 0.13685800  |
| H | -2.77981500 | -2.94986700 | -1.60001600 |
| N | -1.27454700 | -1.73087100 | -0.63074600 |
| C | -3.00254000 | 0.24204800  | 1.77878800  |
| C | -3.25948400 | -0.54730200 | 3.05786100  |
| C | -4.22067500 | 1.03799500  | 1.32998600  |
| H | -2.16383100 | 0.92454600  | 1.92099200  |
| H | -2.36483100 | -1.09428200 | 3.36099100  |
| H | -3.54252200 | 0.13355400  | 3.86261100  |
| H | -4.07371900 | -1.26219300 | 2.91215400  |

|   |             |             |             |
|---|-------------|-------------|-------------|
| H | -4.01727500 | 1.54589000  | 0.38738700  |
| H | -5.09607400 | 0.39386300  | 1.21468200  |
| H | -4.45713200 | 1.78731300  | 2.08738800  |
| C | -0.06288600 | -2.15677300 | -1.34581900 |
| C | -0.13223000 | -1.74420700 | -2.81094500 |
| C | 0.16340900  | -3.65279200 | -1.16451500 |
| H | 0.73947300  | -1.60126000 | -0.85469900 |
| H | -0.29693400 | -0.66918100 | -2.89230700 |
| H | 0.80615500  | -2.00045200 | -3.30752400 |
| H | -0.94147100 | -2.27150500 | -3.32325000 |
| H | 0.18615100  | -3.91959900 | -0.10611800 |
| H | -0.62871000 | -4.22656300 | -1.65232000 |
| H | 1.11307400  | -3.93950800 | -1.62111800 |
| N | 3.17595000  | -0.10525800 | 0.58653800  |
| C | 3.34597300  | -0.52147900 | -0.83751400 |
| C | 2.63828400  | 0.40694500  | -1.81421300 |
| H | 2.94589500  | -1.52955500 | -0.93512200 |
| H | 4.41972000  | -0.57809800 | -1.03882300 |
| H | 2.71162900  | -0.02191400 | -2.81523400 |
| H | 1.58010600  | 0.52007000  | -1.56595000 |
| H | 3.09012000  | 1.39864400  | -1.84892800 |
| C | 4.02868000  | 1.08496200  | 0.88285400  |
| C | 3.73626500  | 1.72181100  | 2.23351600  |
| H | 3.83612100  | 1.80877900  | 0.09180800  |
| H | 5.07345700  | 0.77014900  | 0.80539700  |
| H | 2.66595600  | 1.89548100  | 2.35542700  |
| H | 4.09442400  | 1.12022600  | 3.06851400  |
| H | 4.24815700  | 2.68382000  | 2.27917800  |
| C | 3.45264100  | -1.22825900 | 1.52662600  |
| C | 2.39709800  | -2.32361700 | 1.45998900  |
| H | 3.46434000  | -0.80589800 | 2.52958000  |
| H | 4.45293600  | -1.61429800 | 1.30822500  |
| H | 2.55702700  | -3.01503700 | 2.28813500  |

**PR0-6**

|   |            |             |             |
|---|------------|-------------|-------------|
| C | 4.26572300 | 0.22761700  | -1.33955800 |
| C | 3.18969500 | -0.31606100 | -1.95767800 |
| C | 2.63391500 | -0.01028400 | 0.22647300  |
| N | 3.90347200 | 0.40239800  | -0.01536500 |
| H | 5.23109300 | 0.50340500  | -1.73036800 |
| H | 3.04948400 | -0.60643500 | -2.98501900 |
| N | 2.20946800 | -0.44176800 | -0.98948200 |
| C | 4.77956500 | 0.97714100  | 1.01335000  |
| C | 5.11438100 | 2.42702100  | 0.67871400  |
| C | 6.02984000 | 0.12283000  | 1.19076300  |
| H | 4.18402100 | 0.94385300  | 1.92724700  |
| H | 4.20278800 | 3.01415300  | 0.55381800  |

|   |             |             |             |
|---|-------------|-------------|-------------|
| H | 5.70604600  | 2.86642900  | 1.48377400  |
| H | 5.69855900  | 2.48788400  | -0.24335400 |
| H | 5.76338200  | -0.91001300 | 1.42208300  |
| H | 6.64058200  | 0.13133600  | 0.28416000  |
| H | 6.63472500  | 0.51909200  | 2.00821600  |
| C | 0.88978100  | -1.06049100 | -1.18996700 |
| C | 0.97294800  | -2.56845800 | -0.98349000 |
| C | 0.31555100  | -0.70373900 | -2.55514800 |
| H | 0.25530600  | -0.63755200 | -0.40943600 |
| H | 1.35463700  | -2.79455600 | 0.01403900  |
| H | -0.02171400 | -3.00731500 | -1.08141100 |
| H | 1.63520900  | -3.01880100 | -1.72858900 |
| H | 0.36511900  | 0.37238800  | -2.73968300 |
| H | 0.85020400  | -1.21626600 | -3.35903700 |
| H | -0.72804400 | -1.02136100 | -2.59055200 |
| N | -3.05043000 | 1.41739100  | -0.12864900 |
| C | -2.23069200 | 1.57953400  | -1.37764400 |
| C | -2.90864000 | 1.02837300  | -2.61827900 |
| H | -1.30483100 | 1.03853300  | -1.19570500 |
| H | -2.00756200 | 2.64492900  | -1.46763700 |
| H | -2.17484600 | 1.01490500  | -3.42527600 |
| H | -3.24482900 | 0.00238600  | -2.45286800 |
| H | -3.74953400 | 1.63914600  | -2.94470700 |
| C | -4.44060300 | 1.96647700  | -0.28291500 |
| C | -5.28235100 | 1.81031700  | 0.97188900  |
| H | -4.89721200 | 1.42016500  | -1.10528800 |
| H | -4.33132700 | 3.01190100  | -0.57839200 |
| H | -5.23136700 | 0.78726100  | 1.35164500  |
| H | -4.98681300 | 2.49927400  | 1.76176900  |
| H | -6.31975000 | 2.02350200  | 0.71338100  |
| C | -2.35304800 | 1.99677800  | 1.07236300  |
| C | -0.93942500 | 1.47555000  | 1.25572200  |
| H | -2.95740300 | 1.72299700  | 1.93413800  |
| H | -2.38119000 | 3.08159500  | 0.95053800  |

### TS0-7

|   |            |             |             |
|---|------------|-------------|-------------|
| C | 3.30693600 | 0.17405600  | -1.14868000 |
| C | 2.77331600 | -1.06145500 | -1.32463900 |
| C | 1.21662900 | 0.21692000  | -0.33389100 |
| N | 2.33036400 | 0.94119800  | -0.54354100 |
| H | 4.28089100 | 0.55479100  | -1.40395700 |
| H | 3.19550500 | -1.94735000 | -1.76787300 |
| N | 1.49287600 | -1.01193800 | -0.80902700 |
| C | 2.47716100 | 2.33847700  | -0.08975200 |
| C | 3.22518000 | 3.16561300  | -1.12580100 |
| C | 3.14783700 | 2.36452900  | 1.27866600  |
| H | 1.45380500 | 2.70746300  | -0.00087900 |

|   |             |             |             |
|---|-------------|-------------|-------------|
| H | 2.76834500  | 3.06749900  | -2.11186000 |
| H | 3.19511400  | 4.21529800  | -0.83109600 |
| H | 4.27473300  | 2.86925700  | -1.18930500 |
| H | 2.55501000  | 1.80678000  | 2.00698500  |
| H | 4.14783100  | 1.92557800  | 1.22283200  |
| H | 3.24222700  | 3.39454000  | 1.62645200  |
| C | 0.50911000  | -2.10960100 | -0.82504100 |
| C | 1.11198000  | -3.38767500 | -0.25776800 |
| C | -0.03038400 | -2.30276700 | -2.23828400 |
| H | -0.28819700 | -1.76313500 | -0.16214600 |
| H | 1.52365700  | -3.22234400 | 0.73877900  |
| H | 0.33344300  | -4.14886300 | -0.18584700 |
| H | 1.90050100  | -3.77512100 | -0.90702800 |
| H | -0.42202900 | -1.36525400 | -2.63840600 |
| H | 0.75920300  | -2.65824400 | -2.90493300 |
| H | -0.82997900 | -3.04633700 | -2.23189200 |
| N | -3.18213900 | 0.42900000  | -0.08352900 |
| C | -3.14476300 | -0.99396500 | -0.52464400 |
| C | -2.96921200 | -1.97397300 | 0.62677300  |
| H | -2.30016600 | -1.08380500 | -1.20678300 |
| H | -4.05775000 | -1.19857100 | -1.09214100 |
| H | -2.71101200 | -2.95176900 | 0.21559400  |
| H | -2.15728700 | -1.66122300 | 1.28975800  |
| H | -3.87851400 | -2.09286300 | 1.21523900  |
| C | -4.24635100 | 0.66224000  | 0.93448100  |
| C | -4.30407700 | 2.10172500  | 1.42216900  |
| H | -4.01936500 | 0.00796600  | 1.77531900  |
| H | -5.20006600 | 0.34433400  | 0.50202500  |
| H | -3.30843900 | 2.45359400  | 1.70187300  |
| H | -4.72513000 | 2.77941900  | 0.68005100  |
| H | -4.93905500 | 2.14134900  | 2.30783600  |
| C | -3.30036400 | 1.36682900  | -1.23774300 |
| C | -2.22161700 | 1.15424100  | -2.29002300 |
| H | -3.20796900 | 2.37183700  | -0.82950600 |
| H | -4.30355100 | 1.25847900  | -1.66134900 |

**PR0-7**

|   |            |             |             |
|---|------------|-------------|-------------|
| C | 3.40465100 | -0.09679600 | 1.09499800  |
| C | 2.81567300 | 1.10904300  | 1.28811000  |
| C | 1.27011800 | -0.25899700 | 0.34473900  |
| N | 2.44258800 | -0.91229000 | 0.52603100  |
| H | 4.40599500 | -0.42610800 | 1.31520500  |
| H | 3.20812400 | 2.01633700  | 1.71604300  |
| N | 1.52156500 | 0.98773700  | 0.81516900  |
| C | 2.66206500 | -2.29385000 | 0.06715400  |
| C | 3.46528000 | -3.08758700 | 1.08914200  |
| C | 3.31833100 | -2.28346500 | -1.30920900 |

|   |             |             |             |
|---|-------------|-------------|-------------|
| H | 1.65980200  | -2.71833100 | -0.01381200 |
| H | 3.01496000  | -3.01842200 | 2.08082200  |
| H | 3.48984100  | -4.13646400 | 0.79005400  |
| H | 4.49775500  | -2.73461700 | 1.14507000  |
| H | 2.68642000  | -1.75738200 | -2.02835400 |
| H | 4.29189300  | -1.78688600 | -1.26454400 |
| H | 3.46846900  | -3.30543700 | -1.66197200 |
| C | 0.49470600  | 2.03818000  | 0.87204300  |
| C | 1.02414500  | 3.36070100  | 0.33191400  |
| C | -0.03607100 | 2.17362900  | 2.29579400  |
| H | -0.29523700 | 1.67360400  | 0.20988900  |
| H | 1.43520900  | 3.24270300  | -0.67185000 |
| H | 0.20695900  | 4.08265300  | 0.28591900  |
| H | 1.79812300  | 3.77349800  | 0.98323200  |
| H | -0.39072200 | 1.21103500  | 2.67038000  |
| H | 0.75168100  | 2.53169100  | 2.96375200  |
| H | -0.85841300 | 2.89190000  | 2.32629500  |
| N | -3.26590600 | -0.45503200 | 0.11140100  |
| C | -3.17673400 | 0.95731100  | 0.59997600  |
| C | -3.01805300 | 1.96710800  | -0.52621000 |
| H | -2.30753500 | 0.99897200  | 1.25403700  |
| H | -4.06677500 | 1.15136300  | 1.20322600  |
| H | -2.72392400 | 2.92371400  | -0.09097600 |
| H | -2.23320200 | 1.66046400  | -1.22374700 |
| H | -3.94266300 | 2.12592600  | -1.07957700 |
| C | -4.39287900 | -0.63980700 | -0.85806700 |
| C | -4.48293500 | -2.05632400 | -1.40121300 |
| H | -4.21066200 | 0.05489700  | -1.67601800 |
| H | -5.31002500 | -0.33862500 | -0.34659700 |
| H | -3.50809600 | -2.39955300 | -1.75527600 |
| H | -4.86516800 | -2.76327200 | -0.66578100 |
| H | -5.16769100 | -2.05459800 | -2.24949300 |
| C | -3.32784400 | -1.43985600 | 1.24015300  |
| C | -2.19354600 | -1.26992700 | 2.23858200  |
| H | -3.26881600 | -2.42686500 | 0.78551100  |
| H | -4.30777300 | -1.33196500 | 1.71140600  |

### TS0-8

|   |             |             |             |
|---|-------------|-------------|-------------|
| C | -2.27740600 | -0.88131100 | -1.11556000 |
| C | -2.39986200 | 0.46753600  | -1.13354400 |
| C | -0.25184600 | -0.00979400 | -0.64208900 |
| N | -0.95564000 | -1.14910600 | -0.82025600 |
| H | -3.00739800 | -1.65262800 | -1.29561300 |
| H | -3.25656900 | 1.08991200  | -1.33157900 |
| N | -1.14870800 | 0.97879100  | -0.85234100 |
| C | -0.39349700 | -2.50652300 | -0.73882900 |
| C | -0.44044300 | -3.17993500 | -2.10546100 |

|   |             |             |             |
|---|-------------|-------------|-------------|
| C | -1.11102100 | -3.31219700 | 0.33815400  |
| H | 0.64803200  | -2.36163300 | -0.45257300 |
| H | 0.09251700  | -2.58299800 | -2.84775800 |
| H | 0.02774300  | -4.16372900 | -2.04429700 |
| H | -1.47274000 | -3.31486900 | -2.43743800 |
| H | -1.11646500 | -2.77449100 | 1.28865200  |
| H | -2.14492000 | -3.51689000 | 0.04838200  |
| H | -0.60582600 | -4.26912600 | 0.47926500  |
| C | -0.85573800 | 2.42014200  | -0.79387800 |
| C | -1.61340900 | 3.06584500  | 0.36047600  |
| C | -1.16299300 | 3.07664500  | -2.13513500 |
| H | 0.21574700  | 2.48278200  | -0.60991600 |
| H | -1.39584400 | 2.55727700  | 1.30136000  |
| H | -1.32324500 | 4.11417100  | 0.44998700  |
| H | -2.69164400 | 3.02605700  | 0.18379900  |
| H | -0.62194400 | 2.58022600  | -2.94250100 |
| H | -2.23268000 | 3.04018300  | -2.35474800 |
| H | -0.86149500 | 4.12486200  | -2.10375200 |
| N | 2.30148000  | 0.16432700  | 0.33378200  |
| C | 2.65191100  | 1.60836400  | 0.26689100  |
| C | 1.97032800  | 2.44785600  | 1.34195000  |
| H | 2.35019400  | 1.95609400  | -0.72244400 |
| H | 3.74142400  | 1.70521200  | 0.32827000  |
| H | 1.98554400  | 3.49575000  | 1.03763000  |
| H | 0.92920000  | 2.14559400  | 1.48311700  |
| H | 2.47739900  | 2.37034600  | 2.30346400  |
| C | 2.45863000  | -0.36047700 | 1.71839000  |
| C | 2.01490100  | -1.80236000 | 1.89741700  |
| H | 1.84410300  | 0.25995900  | 2.36598500  |
| H | 3.50871400  | -0.23092000 | 2.00574700  |
| H | 0.95823100  | -1.90641200 | 1.64882300  |
| H | 2.60376100  | -2.51516400 | 1.31925100  |
| H | 2.12726500  | -2.06196800 | 2.95143200  |
| C | 3.11097800  | -0.62447200 | -0.63457200 |
| C | 3.03800700  | -0.10226200 | -2.06358200 |
| H | 2.73329000  | -1.64625900 | -0.60928600 |
| H | 4.14615100  | -0.64638100 | -0.27620800 |

**PR0-8**

|   |             |             |             |
|---|-------------|-------------|-------------|
| C | -2.56855600 | -0.96645700 | -0.88218700 |
| C | -2.72150300 | 0.37841400  | -0.89977400 |
| C | -0.52479300 | -0.04753400 | -0.50719200 |
| N | -1.22631700 | -1.20148200 | -0.64418000 |
| H | -3.29199100 | -1.75289300 | -1.01785500 |
| H | -3.60315700 | 0.97807100  | -1.05277800 |
| N | -1.46706100 | 0.91612200  | -0.67147200 |
| C | -0.61878300 | -2.53988700 | -0.58965100 |

|   |             |             |             |
|---|-------------|-------------|-------------|
| C | -0.92660200 | -3.32183300 | -1.86147500 |
| C | -1.05561500 | -3.27734500 | 0.67042600  |
| H | 0.45447700  | -2.35202300 | -0.54422500 |
| H | -0.63072800 | -2.75326900 | -2.74501000 |
| H | -0.37628100 | -4.26385500 | -1.85136400 |
| H | -1.99135400 | -3.55564800 | -1.93439600 |
| H | -0.78748400 | -2.71081900 | 1.56553800  |
| H | -2.13667400 | -3.44275400 | 0.66807000  |
| H | -0.56418100 | -4.25064200 | 0.72063000  |
| C | -1.18319100 | 2.35917100  | -0.63143400 |
| C | -1.72998700 | 2.97790700  | 0.64988300  |
| C | -1.71252100 | 3.04763200  | -1.88408600 |
| H | -0.09546400 | 2.42557500  | -0.62746900 |
| H | -1.29296100 | 2.49991600  | 1.52977100  |
| H | -1.48750800 | 4.04171500  | 0.68119800  |
| H | -2.81808700 | 2.87629100  | 0.69526200  |
| H | -1.33046100 | 2.56173800  | -2.78352100 |
| H | -2.80442700 | 3.03406000  | -1.91414100 |
| H | -1.39157200 | 4.09049700  | -1.88701400 |
| N | 2.34482100  | 0.22003000  | -0.09292800 |
| C | 2.59285400  | 1.68890100  | -0.22812200 |
| C | 2.10337300  | 2.48535800  | 0.97353000  |
| H | 2.06365800  | 2.00357200  | -1.12701400 |
| H | 3.66285700  | 1.82948900  | -0.40033100 |
| H | 2.00278500  | 3.53190100  | 0.68260900  |
| H | 1.12787200  | 2.12712900  | 1.31365500  |
| H | 2.79693300  | 2.43451500  | 1.81217800  |
| C | 2.87754500  | -0.31583400 | 1.19920800  |
| C | 2.49539400  | -1.76331800 | 1.45323600  |
| H | 2.45603000  | 0.29671000  | 1.99106700  |
| H | 3.96153600  | -0.17602100 | 1.17838000  |
| H | 1.41028800  | -1.87912700 | 1.42434200  |
| H | 2.95954000  | -2.46195500 | 0.75700900  |
| H | 2.82408200  | -2.02868400 | 2.45896800  |
| C | 2.88525500  | -0.54433400 | -1.26274400 |
| C | 2.42951200  | -0.00553200 | -2.61003800 |
| H | 2.54252900  | -1.57126700 | -1.14464000 |
| H | 3.97455400  | -0.53904800 | -1.17469300 |

**[Et<sub>3</sub>N·H]<sup>+</sup>**

|   |             |             |             |
|---|-------------|-------------|-------------|
| H | -0.00073700 | 0.00074800  | 1.21092000  |
| N | 0.00003100  | 0.00079000  | 0.18345800  |
| C | 0.73015000  | -1.24837700 | -0.25719900 |
| C | 0.04444400  | -2.53437200 | 0.17264700  |
| H | 1.72701100  | -1.18761300 | 0.17967100  |
| H | 0.82357500  | -1.17438400 | -1.34490900 |

|   |             |             |             |
|---|-------------|-------------|-------------|
| H | 0.73199900  | -3.36238700 | -0.01181200 |
| H | -0.18238000 | -2.53444900 | 1.24389000  |
| H | -0.86889400 | -2.73801500 | -0.38767400 |
| C | -1.44598400 | -0.00701600 | -0.25861800 |
| C | -2.21937100 | 1.22751500  | 0.17316300  |
| H | -1.89025900 | -0.90254900 | 0.17575900  |
| H | -1.42718200 | -0.12265900 | -1.34653900 |
| H | -2.10814300 | 1.42180200  | 1.24498200  |
| H | -1.94066900 | 2.12245200  | -0.38457100 |
| H | -3.27956400 | 1.04399500  | -0.01299300 |
| C | 0.71721000  | 1.25687200  | -0.25755700 |
| C | 2.17372700  | 1.30516900  | 0.17273500  |
| H | 0.16615700  | 2.09017500  | 0.17847300  |
| H | 0.60691400  | 1.29975700  | -1.34536400 |
| H | 2.54800800  | 2.31402500  | -0.01257200 |
| H | 2.28685500  | 1.11005700  | 1.24426200  |
| H | 2.80606200  | 0.61476800  | -0.38675000 |

### COM1

|   |             |             |             |
|---|-------------|-------------|-------------|
| C | -2.54348700 | 1.39246200  | -0.68312300 |
| C | -1.42500600 | 2.15567000  | -0.75736100 |
| C | -0.91426900 | 0.32265400  | 0.51177500  |
| N | -2.20732000 | 0.29147700  | 0.08636100  |
| H | -3.52226600 | 1.54066300  | -1.11322300 |
| H | -1.25238800 | 3.09537400  | -1.25891600 |
| N | -0.45277500 | 1.48330100  | -0.03438600 |
| C | -3.11513000 | -0.81975300 | 0.38123100  |
| C | -3.56030300 | -1.50592100 | -0.90684300 |
| C | -4.29168300 | -0.34041900 | 1.22745800  |
| H | -2.50569500 | -1.51620000 | 0.96394000  |
| H | -2.68981900 | -1.83333500 | -1.47977500 |
| H | -4.17034300 | -2.38231500 | -0.66959100 |
| H | -4.16557400 | -0.83093200 | -1.52237900 |
| H | -3.93734400 | 0.14761200  | 2.13920100  |
| H | -4.90919200 | 0.37261900  | 0.67000300  |
| H | -4.92535900 | -1.18769400 | 1.50462800  |
| C | 0.91991000  | 1.95751300  | 0.15747200  |
| C | 0.95397400  | 3.09905000  | 1.17043700  |
| C | 1.55296800  | 2.35064100  | -1.17416700 |
| H | 1.45288800  | 1.09389100  | 0.56593300  |
| H | 0.51406300  | 2.77922500  | 2.11851000  |
| H | 1.98575400  | 3.41649300  | 1.34942000  |
| H | 0.39042600  | 3.96278300  | 0.79996500  |
| H | 1.44710200  | 1.54377100  | -1.90410700 |
| H | 1.09806100  | 3.25973600  | -1.58313600 |
| H | 2.61940800  | 2.54696500  | -1.02939800 |
| C | 0.23783300  | -2.32761400 | 0.22903900  |



|   |             |             |             |
|---|-------------|-------------|-------------|
| O | -0.39105000 | -2.70645100 | -0.73533000 |
| H | -0.14150100 | -2.48193600 | 1.25707700  |
| C | 1.57383200  | -1.67783300 | 0.15036000  |
| C | 2.11726500  | -1.32537600 | -1.08632900 |
| C | 2.27222600  | -1.40961300 | 1.32772100  |
| C | 3.35566600  | -0.69326500 | -1.13993000 |
| H | 1.54893200  | -1.54446600 | -1.98583200 |
| C | 3.51604400  | -0.78502500 | 1.27432000  |
| H | 1.82557300  | -1.67067900 | 2.28422500  |
| C | 4.05449300  | -0.42241700 | 0.03919200  |
| H | 3.77896300  | -0.40588800 | -2.09791700 |
| H | 4.06045900  | -0.57308500 | 2.18918100  |
| H | 5.02091800  | 0.07103400  | -0.00649800 |

**TS1**

|   |             |             |             |
|---|-------------|-------------|-------------|
| C | -2.26849600 | 1.25090600  | -1.08105700 |
| C | -1.25893500 | 2.14063600  | -0.91010800 |
| C | -0.80088000 | 0.33285200  | 0.36426400  |
| N | -1.96396900 | 0.14901400  | -0.30016700 |
| H | -3.15427100 | 1.31293500  | -1.69139000 |
| H | -1.10468700 | 3.11686300  | -1.34192700 |
| N | -0.37700200 | 1.55843900  | -0.01762500 |
| C | -2.82630600 | -1.04324600 | -0.12282600 |
| C | -3.76939300 | -1.20788200 | -1.30693400 |
| C | -3.57032700 | -0.93513400 | 1.20300000  |
| H | -2.14202200 | -1.89140600 | -0.06304200 |
| H | -3.22996900 | -1.20172200 | -2.25884000 |
| H | -4.28137700 | -2.16845300 | -1.21360000 |
| H | -4.53873600 | -0.42807900 | -1.32819100 |
| H | -2.85119900 | -0.88906000 | 2.02372700  |
| H | -4.21014400 | -0.04516600 | 1.21593400  |
| H | -4.19652600 | -1.82002700 | 1.34944300  |
| C | 0.89153700  | 2.15806700  | 0.41671900  |
| C | 0.66147500  | 3.56131900  | 0.96936100  |
| C | 1.90250100  | 2.13039100  | -0.72555500 |
| H | 1.24248700  | 1.51099500  | 1.22388100  |
| H | -0.08811400 | 3.54985000  | 1.76485300  |
| H | 1.59776100  | 3.95199600  | 1.37636600  |
| H | 0.32860500  | 4.25040900  | 0.18626100  |
| H | 2.02453200  | 1.11286900  | -1.10802000 |
| H | 1.57507000  | 2.78005100  | -1.54500400 |
| H | 2.87474700  | 2.48629800  | -0.37286700 |
| C | 0.12913900  | -1.16643000 | 1.39176200  |
| O | -0.62430400 | -2.15935900 | 1.41839100  |
| H | 0.27603800  | -0.55308400 | 2.30606500  |
| C | 1.38690300  | -1.20878000 | 0.54056100  |
| C | 1.34413800  | -1.75066000 | -0.74586700 |

|   |            |             |             |
|---|------------|-------------|-------------|
| C | 2.60417000 | -0.76695500 | 1.05461700  |
| C | 2.49795900 | -1.81763400 | -1.51989000 |
| H | 0.39366500 | -2.12099100 | -1.12266800 |
| C | 3.76791800 | -0.83974300 | 0.28540800  |
| H | 2.64453000 | -0.37166600 | 2.06852800  |
| C | 3.71459800 | -1.35762600 | -1.00614300 |
| H | 2.45569700 | -2.23163200 | -2.52310600 |
| H | 4.71315800 | -0.49685600 | 0.69613400  |
| H | 4.61596800 | -1.41190500 | -1.60898900 |

**INT1**

|   |             |             |             |
|---|-------------|-------------|-------------|
| C | -2.30266900 | 1.12279000  | -0.99961400 |
| C | -1.32979400 | 2.06273800  | -0.91083300 |
| C | -0.73174700 | 0.32757100  | 0.35979000  |
| N | -1.91378200 | 0.05254200  | -0.21696900 |
| H | -3.22750500 | 1.12605800  | -1.55177400 |
| H | -1.24535300 | 3.03400200  | -1.37062800 |
| N | -0.36611500 | 1.55516000  | -0.06243700 |
| C | -2.73407900 | -1.17919600 | -0.02994600 |
| C | -3.35646400 | -1.59216400 | -1.35752500 |
| C | -3.76239000 | -0.92585800 | 1.06418500  |
| H | -2.02218600 | -1.92173600 | 0.33639800  |
| H | -2.60388000 | -1.66663900 | -2.14819000 |
| H | -3.81435000 | -2.57635700 | -1.23184900 |
| H | -4.14658800 | -0.90696800 | -1.68503800 |
| H | -3.24178100 | -0.72181900 | 2.00251600  |
| H | -4.42216400 | -0.08848100 | 0.80684700  |
| H | -4.37739600 | -1.82008400 | 1.19933800  |
| C | 0.91214000  | 2.22176900  | 0.25218100  |
| C | 0.66187900  | 3.66369600  | 0.68095000  |
| C | 1.86258200  | 2.11164100  | -0.93645000 |
| H | 1.32675400  | 1.66756400  | 1.09603900  |
| H | -0.06233900 | 3.71187400  | 1.49812300  |
| H | 1.60167200  | 4.10418300  | 1.02297900  |
| H | 0.29636300  | 4.27428900  | -0.15095300 |
| H | 2.02997300  | 1.06485300  | -1.20532700 |
| H | 1.45707000  | 2.64447100  | -1.80371200 |
| H | 2.82581500  | 2.55987500  | -0.67729400 |
| C | 0.06149300  | -0.61207400 | 1.33760200  |
| O | -0.65814900 | -1.63516800 | 1.74875100  |
| H | 0.39077000  | 0.10203400  | 2.14386400  |
| C | 1.34864100  | -0.98528800 | 0.56817100  |
| C | 1.25258500  | -1.64630400 | -0.65946700 |
| C | 2.61279500  | -0.71032600 | 1.08548600  |
| C | 2.39577600  | -1.99419200 | -1.37298200 |
| H | 0.26541500  | -1.89241800 | -1.04846500 |
| C | 3.76565300  | -1.06056500 | 0.37930100  |

|   |            |             |             |
|---|------------|-------------|-------------|
| H | 2.69557100 | -0.22118500 | 2.05493200  |
| C | 3.65925800 | -1.69398000 | -0.85697500 |
| H | 2.30685300 | -2.50031000 | -2.33005900 |
| H | 4.74501400 | -0.84317100 | 0.79617700  |
| H | 4.55279500 | -1.96415400 | -1.41134200 |

**INT1w**

|   |             |             |             |
|---|-------------|-------------|-------------|
| C | -2.08225100 | 1.06745700  | -1.38627900 |
| C | -1.14351000 | 2.03316200  | -1.24145500 |
| C | -0.61476400 | 0.34540200  | 0.11636800  |
| N | -1.73881200 | 0.02779700  | -0.54520600 |
| H | -2.96427400 | 1.03481700  | -2.00448400 |
| H | -1.04674200 | 2.99800400  | -1.71177100 |
| N | -0.24149700 | 1.57082200  | -0.30463200 |
| C | -2.53954100 | -1.22591900 | -0.45305100 |
| C | -2.54558300 | -1.91505400 | -1.81391700 |
| C | -3.94114400 | -0.89538400 | 0.04675300  |
| H | -2.00646300 | -1.82835100 | 0.28591000  |
| H | -1.53068900 | -2.10631100 | -2.17324600 |
| H | -3.06096400 | -2.87472400 | -1.72258100 |
| H | -3.07524100 | -1.32335700 | -2.56937500 |
| H | -3.88030700 | -0.38673600 | 1.01220900  |
| H | -4.49120100 | -0.27746600 | -0.67341900 |
| H | -4.49683400 | -1.82882500 | 0.17464300  |
| C | 0.98290300  | 2.28770200  | 0.09982500  |
| C | 0.64817800  | 3.72660600  | 0.47833800  |
| C | 2.03028300  | 2.18725100  | -1.00547200 |
| H | 1.34861700  | 1.76632700  | 0.98556700  |
| H | -0.14696400 | 3.75880400  | 1.22727600  |
| H | 1.53912400  | 4.20489900  | 0.89263300  |
| H | 0.33746900  | 4.31031400  | -0.39391700 |
| H | 2.25060300  | 1.14151700  | -1.23787900 |
| H | 1.68045000  | 2.68932200  | -1.91409700 |
| H | 2.95487800  | 2.67178800  | -0.67979300 |
| C | 0.13707700  | -0.50096300 | 1.17905000  |
| O | -0.59474400 | -1.52471700 | 1.64180200  |
| H | 0.38003400  | 0.25482400  | 1.96427800  |
| C | 1.47153600  | -0.91936800 | 0.55033500  |
| C | 1.48754800  | -1.64255600 | -0.64498200 |
| C | 2.68310800  | -0.61513600 | 1.16865600  |
| C | 2.69119500  | -2.02997600 | -1.22636400 |
| H | 0.54244000  | -1.90787000 | -1.11418000 |
| C | 3.89457400  | -1.00316500 | 0.59414400  |
| H | 2.67757800  | -0.07362300 | 2.11288700  |
| C | 3.90114300  | -1.70378800 | -0.60996300 |
| H | 2.68978400  | -2.58898300 | -2.15744000 |
| H | 4.83101900  | -0.76108100 | 1.08809000  |

|   |             |             |             |
|---|-------------|-------------|-------------|
| H | 4.84144700  | -2.00470700 | -1.06163500 |
| O | -2.37054300 | -0.02520000 | 2.67167300  |
| H | -1.69517400 | -0.73400200 | 2.37425500  |
| H | -2.45863900 | -0.10321200 | 3.62520300  |

**INT1E13NH**

|   |             |             |             |
|---|-------------|-------------|-------------|
| C | -3.41147800 | 1.75829600  | 0.29237000  |
| C | -3.87654300 | 0.65821900  | -0.34982600 |
| C | -1.66372900 | 0.53363200  | -0.28902800 |
| N | -2.03443900 | 1.66377300  | 0.33560600  |
| H | -3.94246300 | 2.59141400  | 0.72147500  |
| H | -4.88467900 | 0.35410200  | -0.58003800 |
| N | -2.77832700 | -0.09335200 | -0.70476000 |
| C | -1.16388300 | 2.71325300  | 0.95365000  |
| C | -1.83771800 | 3.28019500  | 2.19727000  |
| C | -0.84866700 | 3.77832300  | -0.08911700 |
| H | -0.24821400 | 2.19674200  | 1.23372200  |
| H | -2.15660500 | 2.49032300  | 2.88312000  |
| H | -1.11452300 | 3.91077600  | 2.71921200  |
| H | -2.69717300 | 3.91180300  | 1.95448800  |
| H | -0.32954400 | 3.33473400  | -0.94118200 |
| H | -1.76504900 | 4.26935900  | -0.43302300 |
| H | -0.20152400 | 4.53946600  | 0.35482000  |
| C | -2.85907200 | -1.43616600 | -1.33419800 |
| C | -3.76563300 | -1.38602700 | -2.55870900 |
| C | -3.30989800 | -2.45828500 | -0.29491600 |
| H | -1.84317200 | -1.67551700 | -1.65428400 |
| H | -3.45156800 | -0.60580900 | -3.25631700 |
| H | -3.72012400 | -2.34888100 | -3.07233300 |
| H | -4.80959000 | -1.21382100 | -2.28115700 |
| H | -2.63374300 | -2.47405300 | 0.56432000  |
| H | -4.32280200 | -2.23330000 | 0.05356500  |
| H | -3.31983900 | -3.45327900 | -0.74675500 |
| C | -0.26997000 | -0.02733700 | -0.49070900 |
| O | 0.65851200  | 0.99214000  | -0.31288500 |
| H | -0.24586400 | -0.40071700 | -1.52888700 |
| C | -0.05317300 | -1.21528800 | 0.43665600  |
| C | -0.30107800 | -1.09399500 | 1.80709000  |
| C | 0.43416400  | -2.41881500 | -0.07198600 |
| C | -0.05945500 | -2.16661400 | 2.66034500  |
| H | -0.67722100 | -0.15506400 | 2.20980600  |
| C | 0.68007700  | -3.49493900 | 0.78188000  |
| H | 0.62948200  | -2.51538300 | -1.13917600 |
| C | 0.43295300  | -3.36872000 | 2.14716100  |
| H | -0.25157300 | -2.06778200 | 3.72382400  |
| H | 1.06331400  | -4.42811600 | 0.38171900  |

|   |            |             |             |
|---|------------|-------------|-------------|
| H | 0.62264900 | -4.20441400 | 2.81281000  |
| H | 1.62579900 | 0.62830500  | -0.37823100 |
| N | 3.19419500 | 0.33937600  | -0.54098200 |
| C | 3.86001600 | 0.27547600  | 0.77713400  |
| C | 3.51792900 | -0.96604900 | 1.59213600  |
| H | 3.54538000 | 1.15794400  | 1.33925500  |
| H | 4.95247100 | 0.34770500  | 0.63780500  |
| H | 3.88318800 | -0.83191200 | 2.61334200  |
| H | 2.43518400 | -1.12065300 | 1.63800200  |
| H | 3.98250200 | -1.87239400 | 1.19735700  |
| C | 3.45913000 | -0.88250500 | -1.32217100 |
| C | 2.78388300 | -0.89205500 | -2.68942300 |
| H | 3.08510700 | -1.72754600 | -0.73879300 |
| H | 4.54777500 | -1.02156200 | -1.43819500 |
| H | 1.73510100 | -0.58127200 | -2.61006700 |
| H | 3.27470500 | -0.23351600 | -3.40872300 |
| H | 2.80995800 | -1.90385300 | -3.10234000 |
| C | 3.63284600 | 1.53937000  | -1.28638400 |
| C | 3.40300100 | 2.84708400  | -0.53613500 |
| H | 3.05921500 | 1.56950500  | -2.21605100 |
| H | 4.69765500 | 1.43585900  | -1.55610400 |
| H | 3.54716200 | 3.68345000  | -1.22432700 |
| H | 2.37880400 | 2.89702000  | -0.15090200 |
| H | 4.09949700 | 2.98233100  | 0.29373400  |

### INT1E3N

|   |             |             |             |
|---|-------------|-------------|-------------|
| C | 0.66828100  | 2.00649100  | 1.94930800  |
| C | -0.04975400 | 1.02914400  | 2.55657700  |
| C | 0.62992400  | 0.25385000  | 0.58089000  |
| N | 1.07946600  | 1.51017200  | 0.73198700  |
| H | 0.91191100  | 3.00365600  | 2.27777000  |
| H | -0.55754000 | 1.01654900  | 3.50732700  |
| N | -0.05894700 | -0.05431000 | 1.69622500  |
| C | 1.93897000  | 2.22459100  | -0.24258500 |
| C | 3.38488900  | 2.19880400  | 0.24192600  |
| C | 1.40692600  | 3.63534000  | -0.45999100 |
| H | 1.81388800  | 1.65593200  | -1.16863800 |
| H | 3.73468000  | 1.17098100  | 0.37685100  |
| H | 4.02443100  | 2.68154000  | -0.50238100 |
| H | 3.49327300  | 2.74052500  | 1.18907000  |
| H | 0.35581300  | 3.60752900  | -0.75730200 |
| H | 1.51336700  | 4.26009100  | 0.43408200  |
| H | 1.97871500  | 4.10906500  | -1.26182600 |
| C | -0.74177200 | -1.32913000 | 1.99902500  |
| C | -2.24910500 | -1.11067200 | 2.06598200  |
| C | -0.16959700 | -1.93004400 | 3.28015700  |
| H | -0.50852900 | -1.98946200 | 1.16142300  |

|   |             |             |             |
|---|-------------|-------------|-------------|
| H | -2.63198800 | -0.69324200 | 1.12696700  |
| H | -2.74417900 | -2.06988100 | 2.24703800  |
| H | -2.50774700 | -0.43853800 | 2.89247800  |
| H | 0.91695300  | -2.03569500 | 3.22207400  |
| H | -0.41268300 | -1.31213300 | 4.15056000  |
| H | -0.60742000 | -2.91825000 | 3.44160900  |
| C | 0.82050800  | -0.55756800 | -0.72718200 |
| O | 0.43688100  | 0.16872800  | -1.77505100 |
| H | 0.22976100  | -1.49253700 | -0.56887500 |
| C | 2.30221700  | -1.00787600 | -0.74181600 |
| C | 3.05865000  | -0.74313300 | -1.88019100 |
| C | 2.90036700  | -1.65543200 | 0.34198900  |
| C | 4.40510300  | -1.10690800 | -1.92972600 |
| H | 2.55506600  | -0.24498100 | -2.70448800 |
| C | 4.24491300  | -2.01910600 | 0.29843000  |
| H | 2.31300100  | -1.87169300 | 1.23487300  |
| C | 5.00300000  | -1.73954500 | -0.84017000 |
| H | 4.99032800  | -0.89454800 | -2.82007700 |
| H | 4.70322400  | -2.51630100 | 1.14854600  |
| H | 6.05186900  | -2.01826300 | -0.87667400 |
| N | -3.53153500 | -0.07197600 | -0.98546900 |
| C | -2.65755000 | -0.72530300 | -1.96847300 |
| C | -2.41627500 | -2.20108400 | -1.66514600 |
| H | -1.68322600 | -0.22352800 | -1.96770600 |
| H | -3.08079600 | -0.61521700 | -2.98660700 |
| H | -1.63051900 | -2.58357900 | -2.32333300 |
| H | -2.08063500 | -2.32207600 | -0.62898000 |
| H | -3.30395500 | -2.82630400 | -1.80416700 |
| C | -4.92291400 | -0.49664700 | -1.13205800 |
| C | -5.73487200 | -0.31428300 | 0.14663800  |
| H | -4.93042200 | -1.55799200 | -1.39514300 |
| H | -5.40598500 | 0.03676100  | -1.97399200 |
| H | -5.29380300 | -0.90273900 | 0.95696300  |
| H | -5.76795600 | 0.73044700  | 0.46893500  |
| H | -6.76630200 | -0.64797300 | -0.00285000 |
| C | -3.42278700 | 1.38481500  | -1.08893700 |
| C | -2.12840500 | 1.93180500  | -0.49576900 |
| H | -4.27294100 | 1.82730600  | -0.55964300 |
| H | -3.51391300 | 1.69855800  | -2.14719200 |
| H | -2.11837700 | 3.02466800  | -0.57594200 |
| H | -2.06392400 | 1.67132700  | 0.56840700  |
| H | -1.24567100 | 1.53431100  | -1.01120600 |

**TS2<sub>DPT</sub>**

|   |             |            |             |
|---|-------------|------------|-------------|
| C | -2.83758300 | 0.29485800 | -0.68251700 |
| C | -2.26726400 | 1.52411700 | -0.69513300 |
| C | -0.82203100 | 0.10898700 | 0.25988200  |

|   |             |             |             |
|---|-------------|-------------|-------------|
| N | -1.93603400 | -0.57559500 | -0.09395100 |
| H | -3.79808200 | -0.02727900 | -1.04657100 |
| H | -2.64439100 | 2.46462000  | -1.06241300 |
| N | -1.01779400 | 1.40152800  | -0.11625000 |
| C | -2.05410800 | -2.04982800 | -0.00441000 |
| C | -1.00959700 | -2.69557400 | -0.90902900 |
| C | -3.46950100 | -2.49141000 | -0.34477500 |
| H | -1.79939700 | -2.29124500 | 1.03133400  |
| H | -0.00135900 | -2.43212100 | -0.57887100 |
| H | -1.10608800 | -3.78354700 | -0.85226800 |
| H | -1.14964300 | -2.38414600 | -1.95066900 |
| H | -4.21557700 | -1.99404200 | 0.28233700  |
| H | -3.71081300 | -2.31612700 | -1.39938000 |
| H | -3.54664900 | -3.56586100 | -0.16421300 |
| C | -0.17153800 | 2.52829700  | 0.31373300  |
| C | -0.78927600 | 3.18324300  | 1.54709000  |
| C | 0.03452800  | 3.51068000  | -0.83289700 |
| H | 0.78823600  | 2.08483900  | 0.58587100  |
| H | -0.92008900 | 2.44678600  | 2.34433400  |
| H | -0.13529100 | 3.97957000  | 1.91239800  |
| H | -1.76444900 | 3.62045000  | 1.30750900  |
| H | 0.43795000  | 3.01031800  | -1.71704800 |
| H | -0.90078500 | 4.00944200  | -1.10816600 |
| H | 0.74142600  | 4.28396000  | -0.52248900 |
| C | 0.31417000  | -0.41160800 | 0.99674400  |
| O | -0.00135900 | -1.54272200 | 1.85877300  |
| H | 0.22373900  | -0.30942100 | 2.18409800  |
| C | 1.64261400  | -0.43587600 | 0.34363200  |
| C | 1.94835900  | 0.23979700  | -0.85090700 |
| C | 2.65129500  | -1.21344000 | 0.93726700  |
| C | 3.22545900  | 0.17859800  | -1.40334200 |
| H | 1.17519500  | 0.79411600  | -1.37809500 |
| C | 3.92410400  | -1.27482200 | 0.37908500  |
| H | 2.39845600  | -1.77386600 | 1.83095600  |
| C | 4.22609100  | -0.57229000 | -0.78837000 |
| H | 3.43317300  | 0.70681100  | -2.32985700 |
| H | 4.68747100  | -1.88249500 | 0.85702700  |
| H | 5.22030600  | -0.62289300 | -1.22091100 |

**TS2<sub>E13N</sub>**

|   |             |             |             |
|---|-------------|-------------|-------------|
| C | -3.49234800 | 0.19479800  | 0.45569200  |
| C | -2.88858400 | 0.92359600  | 1.41685200  |
| C | -1.29035700 | 0.24519100  | -0.03461100 |
| N | -2.51478600 | -0.22667000 | -0.43281200 |
| H | -4.53175400 | -0.05672100 | 0.33122200  |
| H | -3.30070700 | 1.40443100  | 2.28935400  |
| N | -1.53268400 | 0.96599200  | 1.12222400  |

|   |             |             |             |
|---|-------------|-------------|-------------|
| C | -2.79023100 | -0.74626100 | -1.79265200 |
| C | -2.57064900 | 0.37079500  | -2.80846500 |
| C | -4.19356100 | -1.33163000 | -1.86997300 |
| H | -2.02382200 | -1.50572700 | -1.96340300 |
| H | -1.52796500 | 0.69849600  | -2.77505600 |
| H | -2.77606300 | -0.00312400 | -3.81629800 |
| H | -3.23502200 | 1.22026600  | -2.60737000 |
| H | -4.36877400 | -2.07527600 | -1.08597000 |
| H | -4.97038700 | -0.56024200 | -1.81046200 |
| H | -4.30455100 | -1.83095100 | -2.83559300 |
| C | -0.54432900 | 1.41400000  | 2.11077500  |
| C | -0.70432200 | 0.62347000  | 3.41478200  |
| C | -0.67273500 | 2.90885800  | 2.40843600  |
| H | 0.43137900  | 1.20481800  | 1.66422400  |
| H | -0.84113500 | -0.44068200 | 3.22077200  |
| H | 0.17849400  | 0.76293600  | 4.04684100  |
| H | -1.57455400 | 0.97578300  | 3.97843600  |
| H | -0.50745700 | 3.53034800  | 1.52871700  |
| H | -1.66697500 | 3.13265200  | 2.81007900  |
| H | 0.06300800  | 3.19002400  | 3.16763300  |
| C | -0.03828400 | -0.10811400 | -0.69078700 |
| O | -0.08747700 | -1.15608000 | -1.54467000 |
| H | 0.83100500  | -0.91676500 | 0.19992900  |
| C | 0.86686000  | 1.01867400  | -1.05805700 |
| C | 1.99604100  | 0.72161600  | -1.84833300 |
| C | 0.69481100  | 2.36389400  | -0.68312300 |
| C | 2.95164100  | 1.68982300  | -2.13998100 |
| H | 2.08451600  | -0.28529000 | -2.24092800 |
| C | 1.64961200  | 3.33426600  | -0.97517000 |
| H | -0.22992500 | 2.66446300  | -0.20453600 |
| C | 2.80529300  | 3.00155100  | -1.68301400 |
| H | 3.81544700  | 1.42229400  | -2.74362500 |
| H | 1.47645400  | 4.36354900  | -0.66949400 |
| H | 3.55277100  | 3.75545400  | -1.90875500 |
| N | 1.60248700  | -1.82143600 | 0.65548500  |
| C | 1.53572100  | -3.08731600 | -0.13817400 |
| C | 2.23155400  | -3.07013000 | -1.48771800 |
| H | 0.47736500  | -3.27180900 | -0.31476400 |
| H | 1.95422400  | -3.88490200 | 0.50078700  |
| H | 2.04609600  | -4.03744600 | -1.96431300 |
| H | 1.77626000  | -2.29295200 | -2.10393000 |
| H | 3.31546900  | -2.94616100 | -1.41761400 |
| C | 2.98642500  | -1.28685400 | 0.71437700  |
| C | 3.12273700  | 0.03663400  | 1.45619400  |
| H | 3.30670300  | -1.13534700 | -0.31597500 |
| H | 3.62932100  | -2.05908000 | 1.16617600  |
| H | 2.48347300  | 0.80090600  | 1.00332600  |



|   |             |             |            |
|---|-------------|-------------|------------|
| H | 2.90327500  | -0.04386700 | 2.52447000 |
| H | 4.15581500  | 0.38028200  | 1.35787100 |
| C | 1.07722600  | -2.07295000 | 2.01663100 |
| C | -0.33081500 | -2.65737900 | 2.01346200 |
| H | 1.07418600  | -1.11230400 | 2.53558400 |
| H | 1.77799400  | -2.73659600 | 2.54494000 |
| H | -0.73401800 | -2.63511400 | 3.02968400 |
| H | -0.99118400 | -2.07603600 | 1.35906500 |
| H | -0.34450100 | -3.69605700 | 1.67919100 |

**TS2w**

|   |             |             |             |
|---|-------------|-------------|-------------|
| C | 1.40465600  | 2.18163800  | -0.93731100 |
| C | 2.31707200  | 1.19539700  | -1.13908300 |
| C | 0.68206900  | 0.35656000  | 0.10943000  |
| N | 0.39900900  | 1.64407700  | -0.16626500 |
| H | 1.39123600  | 3.20536100  | -1.27555600 |
| H | 3.24858200  | 1.20209600  | -1.68081300 |
| N | 1.85299300  | 0.07205400  | -0.48687600 |
| C | -0.83258900 | 2.34539000  | 0.25664300  |
| C | -1.72172300 | 2.59803400  | -0.95581800 |
| C | -0.46413300 | 3.61401800  | 1.01632600  |
| H | -1.32817400 | 1.65814600  | 0.94317400  |
| H | -1.97928100 | 1.65503000  | -1.44691300 |
| H | -2.64700200 | 3.08143900  | -0.63124000 |
| H | -1.22961400 | 3.25701300  | -1.67976600 |
| H | 0.18315400  | 3.37596600  | 1.86374200  |
| H | 0.04088700  | 4.34077300  | 0.37067800  |
| H | -1.37500300 | 4.08303600  | 1.39647200  |
| C | 2.58427900  | -1.21781600 | -0.41849900 |
| C | 3.77977000  | -1.07297200 | 0.51342100  |
| C | 2.95807200  | -1.66752600 | -1.82654300 |
| H | 1.89082700  | -1.92477800 | 0.03922800  |
| H | 3.42471800  | -0.86140600 | 1.52457200  |
| H | 4.32052100  | -2.02269200 | 0.54623600  |
| H | 4.46620100  | -0.29399000 | 0.16100600  |
| H | 2.08311600  | -1.70076400 | -2.48209400 |
| H | 3.71070100  | -1.01225600 | -2.27821000 |
| H | 3.38614500  | -2.67139200 | -1.77389900 |
| C | -0.14977100 | -0.55260500 | 0.95119300  |
| O | -0.37513100 | 0.09101800  | 2.20258400  |
| H | 0.57359500  | -1.50075500 | 1.39647600  |
| C | -1.41782500 | -0.92846300 | 0.25375200  |
| C | -2.62844500 | -0.99227000 | 0.95430300  |
| C | -1.42017300 | -1.25704700 | -1.11150900 |
| C | -3.80396300 | -1.36984700 | 0.30599500  |
| H | -2.63014800 | -0.73594800 | 2.00858400  |
| C | -2.59429400 | -1.63408500 | -1.75610500 |

|   |             |             |             |
|---|-------------|-------------|-------------|
| H | -0.48975500 | -1.21932800 | -1.67707500 |
| C | -3.79688100 | -1.69054700 | -1.05046400 |
| H | -4.73324100 | -1.41128300 | 0.86716900  |
| H | -2.57112000 | -1.88518200 | -2.81274200 |
| H | -4.71373800 | -1.98356800 | -1.55197700 |
| O | 1.43123800  | -1.95517800 | 2.32054000  |
| H | 1.17327400  | -2.76932300 | 2.76480900  |
| H | 0.21452300  | -0.41298400 | 2.80076000  |

**TS2<sub>E13N-H</sub>**

|   |             |             |             |
|---|-------------|-------------|-------------|
| C | 3.29991500  | -0.69197800 | 0.66500900  |
| C | 2.53264200  | -1.10448700 | 1.69510900  |
| C | 1.15699400  | -0.50348000 | 0.02152500  |
| N | 2.44933300  | -0.34598900 | -0.37518400 |
| H | 4.37144300  | -0.63593200 | 0.57414400  |
| H | 2.80942800  | -1.47403200 | 2.66925100  |
| N | 1.21287700  | -0.98282300 | 1.29888100  |
| C | 2.95768800  | 0.10725900  | -1.69525600 |
| C | 4.22158900  | -0.66025300 | -2.07379400 |
| C | 3.18135800  | 1.61495800  | -1.66918300 |
| H | 2.18212100  | -0.14111100 | -2.41458200 |
| H | 4.08223300  | -1.73960400 | -1.97217200 |
| H | 4.45807000  | -0.44257800 | -3.11782000 |
| H | 5.08636500  | -0.35395500 | -1.47830900 |
| H | 2.24313900  | 2.13439900  | -1.46232500 |
| H | 3.91842600  | 1.87713500  | -0.90244100 |
| H | 3.56115700  | 1.95372800  | -2.63657500 |
| C | 0.08203200  | -1.21816900 | 2.21803800  |
| C | 0.30549000  | -0.44656800 | 3.52218400  |
| C | -0.10115500 | -2.70607000 | 2.51088800  |
| H | -0.79633300 | -0.82865500 | 1.69630500  |
| H | 0.67708900  | 0.56465100  | 3.34168300  |
| H | -0.63518900 | -0.38721900 | 4.07689100  |
| H | 1.02757000  | -0.96074500 | 4.16380500  |
| H | -0.35662900 | -3.27436000 | 1.61753200  |
| H | 0.81318300  | -3.12093000 | 2.94774500  |
| H | -0.90671000 | -2.83331500 | 3.23886400  |
| C | -0.07682400 | -0.11794200 | -0.65858200 |
| O | 0.14799300  | 0.70771100  | -1.80980300 |
| H | -0.82397800 | 1.13717100  | 0.04434400  |
| C | -1.05071100 | -1.21233900 | -0.94908900 |
| C | -2.31666200 | -0.88005300 | -1.46256600 |
| C | -0.74326200 | -2.57315400 | -0.81141500 |
| C | -3.24850500 | -1.86129400 | -1.78275000 |
| H | -2.56266700 | 0.16659500  | -1.62523300 |
| C | -1.68098000 | -3.55982900 | -1.11505500 |
| H | 0.25098800  | -2.86905600 | -0.48544300 |

|   |             |             |             |
|---|-------------|-------------|-------------|
| C | -2.94002100 | -3.20936000 | -1.59490400 |
| H | -4.21796300 | -1.57512600 | -2.17884800 |
| H | -1.41627600 | -4.60647500 | -0.99789000 |
| H | -3.66726200 | -3.97684200 | -1.83769900 |
| N | -1.28762100 | 2.17467700  | 0.37775600  |
| C | -0.61956400 | 2.47895000  | 1.67695300  |
| C | 0.88674600  | 2.67618800  | 1.57302000  |
| H | -0.83773100 | 1.64087400  | 2.33991800  |
| H | -1.10117900 | 3.37128500  | 2.09628000  |
| H | 1.29677600  | 2.76583200  | 2.58235400  |
| H | 1.37397800  | 1.82527900  | 1.08581200  |
| H | 1.15379800  | 3.58669500  | 1.03326200  |
| C | -0.95289400 | 3.23211700  | -0.63175000 |
| C | -1.77592500 | 3.19031800  | -1.90859700 |
| H | 0.10014000  | 3.08976500  | -0.87759000 |
| H | -1.06815400 | 4.20307700  | -0.13178000 |
| H | -1.74975000 | 2.19501600  | -2.35687900 |
| H | -2.81020600 | 3.50550900  | -1.75678400 |
| H | -1.32586000 | 3.88488600  | -2.62187600 |
| C | -2.76131500 | 2.03626100  | 0.57571300  |
| C | -3.15596500 | 0.89194300  | 1.49842300  |
| H | -3.20149200 | 1.86797600  | -0.40644400 |
| H | -3.13652000 | 2.99839300  | 0.94801800  |
| H | -4.24495700 | 0.80481800  | 1.49243700  |
| H | -2.75211400 | -0.05756400 | 1.13342600  |
| H | -2.84845000 | 1.04901500  | 2.53472700  |
| H | 0.04344300  | 0.17455100  | -2.61137900 |

## M1

|   |             |             |             |
|---|-------------|-------------|-------------|
| C | -2.70001700 | 1.07925900  | -0.43631600 |
| C | -1.75091400 | 2.02786600  | -0.50644200 |
| C | -0.72862200 | 0.08867100  | 0.05917600  |
| N | -2.08672700 | -0.12728000 | -0.10085500 |
| H | -3.75987300 | 1.14537000  | -0.62268900 |
| H | -1.83729400 | 3.07672300  | -0.74081900 |
| N | -0.51442400 | 1.43749300  | -0.21250400 |
| C | -2.70247400 | -1.44334700 | -0.31948900 |
| C | -3.46543000 | -1.47514100 | -1.64383100 |
| C | -3.59132600 | -1.82048700 | 0.86196200  |
| H | -1.87126500 | -2.14609200 | -0.37804700 |
| H | -2.83379400 | -1.12912500 | -2.46652500 |
| H | -3.77730200 | -2.50160600 | -1.85539100 |
| H | -4.36828000 | -0.85649400 | -1.61206400 |
| H | -3.00540600 | -1.84887000 | 1.78333800  |
| H | -4.40072800 | -1.09139900 | 0.98308900  |
| H | -4.04023300 | -2.80527600 | 0.70279500  |
| C | 0.53321100  | 2.21406600  | 0.47412700  |

|   |             |             |             |
|---|-------------|-------------|-------------|
| C | 0.03081000  | 2.69258700  | 1.83632200  |
| C | 1.01115600  | 3.36004700  | -0.40935800 |
| H | 1.36707300  | 1.53085800  | 0.63204800  |
| H | -0.33135400 | 1.84507900  | 2.42614900  |
| H | 0.84125700  | 3.17744800  | 2.38807000  |
| H | -0.78779900 | 3.41124900  | 1.72274200  |
| H | 1.36096000  | 2.98653100  | -1.37541000 |
| H | 0.21690900  | 4.09344200  | -0.58492300 |
| H | 1.83809100  | 3.88058000  | 0.08083200  |
| C | 0.20961900  | -0.85229100 | 0.45184800  |
| O | -0.28099300 | -1.97476200 | 1.14590300  |
| H | -0.28177700 | -1.77278100 | 2.08918900  |
| C | 1.61297700  | -0.88210400 | 0.08168700  |
| C | 2.14673800  | -0.09608300 | -0.96492200 |
| C | 2.49663300  | -1.76797800 | 0.73202500  |
| C | 3.49167900  | -0.16220200 | -1.30473200 |
| H | 1.48616200  | 0.55310700  | -1.53387400 |
| C | 3.84171100  | -1.83190100 | 0.38245900  |
| H | 2.10994900  | -2.42163100 | 1.50639000  |
| C | 4.35839100  | -1.02393500 | -0.62979700 |
| H | 3.86389300  | 0.45548200  | -2.11777400 |
| H | 4.49331300  | -2.52422300 | 0.90861700  |
| H | 5.40864900  | -1.07392300 | -0.89777700 |

**COM2<sub>b</sub>**

|   |             |             |             |
|---|-------------|-------------|-------------|
| C | -1.88699500 | -1.16398500 | 1.80521300  |
| C | -0.98684700 | -0.60874700 | 2.91432700  |
| C | -3.34598000 | -0.84250000 | 2.12284400  |
| C | -1.47230100 | 0.77971300  | 3.39034800  |
| C | -3.61371600 | 0.66695700  | 2.06047300  |
| C | -2.33172200 | 1.46830700  | 2.32796800  |
| H | -1.58542500 | -0.72396900 | 0.84321900  |
| H | -2.07241100 | 0.66338700  | 4.30009800  |
| H | -3.57750800 | -1.16973100 | 3.14494800  |
| H | -1.73844400 | -2.24568600 | 1.71323300  |
| H | -1.03311700 | -1.30348000 | 3.76655100  |
| H | -4.02983500 | -1.38195900 | 1.46127100  |
| H | -0.60613400 | 1.39715000  | 3.65362300  |
| H | -4.00047500 | 0.93510300  | 1.06485400  |
| H | -2.59970100 | 2.48319400  | 2.64517500  |
| H | -1.76337500 | 1.57330100  | 1.39665600  |
| N | 0.39643800  | -0.54636800 | 2.41538100  |
| H | 1.06395900  | -0.44372700 | 3.17596100  |
| H | 0.62966000  | -1.38128200 | 1.85585500  |
| O | -4.61591300 | 0.92765300  | 3.03937400  |
| H | -4.90299600 | 1.84408400  | 2.95902400  |
| C | 1.96939200  | 3.87523500  | -2.18831800 |

|    |             |             |             |
|----|-------------|-------------|-------------|
| C  | 3.23943800  | 3.96566500  | -1.33805500 |
| N  | 1.76193300  | 2.41365800  | -0.35298200 |
| H  | 2.14659500  | 3.55894000  | -3.21862900 |
| H  | 3.42222600  | 4.95881000  | -0.92159500 |
| C  | 3.01290300  | 2.99497300  | -0.18282200 |
| O  | 3.77833300  | 2.75714200  | 0.72049800  |
| C  | 1.11379400  | 2.82163400  | -1.49719400 |
| O  | 0.04013200  | 2.40415600  | -1.88273400 |
| Br | 1.04615900  | 1.10330700  | 0.89300900  |
| H  | 1.39914900  | 4.80681800  | -2.22256700 |
| H  | 4.14350900  | 3.66006600  | -1.86994700 |
| C  | 2.70129300  | -3.86003600 | 0.18567500  |
| C  | 1.83317600  | -2.86135900 | -0.60535800 |
| C  | 4.18610100  | -3.67912600 | -0.13467300 |
| C  | 2.61626100  | -1.56564900 | -0.88512100 |
| C  | 4.68256500  | -2.30197900 | 0.32613200  |
| C  | 3.55153000  | -1.26303900 | 0.28173100  |
| H  | 2.53365500  | -3.68611700 | 1.25759800  |
| H  | 3.21381900  | -1.68083100 | -1.79767100 |
| H  | 4.34349400  | -3.74027800 | -1.21851000 |
| H  | 2.38193000  | -4.88742300 | -0.02025100 |
| H  | 1.57067300  | -3.32067300 | -1.57284500 |
| H  | 4.79214400  | -4.46978600 | 0.31645700  |
| H  | 1.91416700  | -0.74392500 | -1.05795200 |
| H  | 5.06631400  | -2.37553600 | 1.35510000  |
| H  | 3.97048500  | -0.25135600 | 0.22072000  |
| H  | 2.98403500  | -1.30030900 | 1.22061000  |
| N  | 0.62549400  | -2.54604700 | 0.17517700  |
| H  | -0.00234900 | -1.96171900 | -0.38915000 |
| H  | 0.12223300  | -3.40898800 | 0.37603400  |
| O  | 5.75018600  | -1.95332300 | -0.55012800 |
| H  | 6.13296000  | -1.11875300 | -0.25623100 |
| C  | -2.72868900 | 0.70207200  | -1.76051600 |
| C  | -1.94896700 | -0.30875700 | -2.61997600 |
| C  | -4.23479800 | 0.53991500  | -1.95605800 |
| C  | -2.74783500 | -1.61203000 | -2.81008200 |
| C  | -4.71510500 | -0.82884900 | -1.46041400 |
| C  | -3.60136200 | -1.88292800 | -1.57435200 |
| H  | -2.46610900 | 0.52827200  | -0.70688600 |
| H  | -3.40402300 | -1.53130400 | -3.68487600 |
| H  | -4.47885900 | 0.60600800  | -3.02392700 |
| H  | -2.40000600 | 1.71807900  | -1.99239800 |
| H  | -1.78087400 | 0.14629900  | -3.60856100 |
| H  | -4.79369100 | 1.33857200  | -1.45854400 |
| H  | -2.05210900 | -2.43676400 | -3.00302000 |
| H  | -5.03224000 | -0.74733000 | -0.40935700 |
| H  | -4.05163100 | -2.88281800 | -1.60167400 |

|   |             |             |             |
|---|-------------|-------------|-------------|
| H | -2.95852000 | -1.84568000 | -0.68460600 |
| N | -0.67336000 | -0.60662200 | -1.94934900 |
| H | -0.03633700 | -1.04262000 | -2.61487200 |
| H | -0.24351600 | 0.27839700  | -1.67642000 |
| O | -5.84252700 | -1.16966400 | -2.26267800 |
| H | -6.24492400 | -1.97317100 | -1.91469100 |

**TS3<sub>b</sub>**

|    |             |             |             |
|----|-------------|-------------|-------------|
| C  | 1.30275200  | -2.52634700 | -0.10515000 |
| C  | 0.40966600  | -2.58100600 | -1.34952600 |
| C  | 2.66041200  | -3.16240700 | -0.39866900 |
| C  | 1.22837800  | -2.28029600 | -2.63291100 |
| C  | 3.45185900  | -2.34586700 | -1.43086300 |
| C  | 2.52400800  | -1.52245700 | -2.33340700 |
| H  | 1.43490000  | -1.47610500 | 0.18929300  |
| H  | 1.48667300  | -3.22732400 | -3.12177900 |
| H  | 2.51021700  | -4.16390900 | -0.82217600 |
| H  | 0.81030700  | -3.03793300 | 0.73162600  |
| H  | 0.01826400  | -3.60661200 | -1.43032200 |
| H  | 3.24760900  | -3.29404300 | 0.51592200  |
| H  | 0.61021100  | -1.71170500 | -3.33606800 |
| H  | 4.13688600  | -1.65954000 | -0.90941800 |
| H  | 3.04826000  | -1.28117000 | -3.26563900 |
| H  | 2.29969200  | -0.55969100 | -1.86208900 |
| N  | -0.76178800 | -1.70914100 | -1.14486700 |
| H  | -1.42924400 | -1.86675600 | -1.89919800 |
| H  | -1.24527800 | -1.58114500 | 0.24304200  |
| O  | 4.21342400  | -3.29706900 | -2.17009800 |
| H  | 4.77595600  | -2.82603800 | -2.79520500 |
| C  | 0.19351600  | 4.74027200  | -0.83175800 |
| C  | 1.26281300  | 4.45247900  | -1.88632200 |
| N  | 0.17055500  | 2.41838200  | -1.31384600 |
| H  | -0.60347100 | 5.40526000  | -1.17443000 |
| H  | 2.27671600  | 4.71345600  | -1.57298800 |
| C  | 1.18395700  | 2.93371700  | -2.08905400 |
| O  | 1.91545500  | 2.28587400  | -2.81373000 |
| C  | -0.40635000 | 3.36361600  | -0.53462500 |
| O  | -1.27128600 | 3.15850600  | 0.31777800  |
| Br | -0.31949300 | 0.28365100  | -1.27131000 |
| H  | 0.58860900  | 5.15652700  | 0.09906600  |
| H  | 1.08006800  | 4.94123400  | -2.84660100 |
| C  | -3.77220800 | -2.30704500 | 1.08156900  |
| C  | -2.97696600 | -1.06782600 | 1.51982700  |
| C  | -5.21101200 | -1.91189200 | 0.74769300  |
| C  | -3.40126600 | 0.18945600  | 0.73578700  |
| C  | -5.26521300 | -0.98880800 | -0.47949300 |
| C  | -3.96316700 | -0.18739100 | -0.63217900 |

|   |             |             |             |
|---|-------------|-------------|-------------|
| H | -3.29553600 | -2.74711000 | 0.19447600  |
| H | -4.18869600 | 0.70091500  | 1.30102600  |
| H | -5.64685300 | -1.36011400 | 1.58991100  |
| H | -3.74753100 | -3.07135000 | 1.86591400  |
| H | -3.14351700 | -0.89041500 | 2.58934800  |
| H | -5.83779600 | -2.79318100 | 0.58929400  |
| H | -2.57108600 | 0.89614000  | 0.64124400  |
| H | -5.42613200 | -1.59186300 | -1.38589100 |
| H | -4.14613500 | 0.71131700  | -1.23141300 |
| H | -3.22919400 | -0.77962600 | -1.19103500 |
| N | -1.51794700 | -1.32661400 | 1.34460200  |
| H | -0.98921600 | -0.47291400 | 1.67763400  |
| H | -1.23075600 | -2.11651300 | 1.92441200  |
| O | -6.38629800 | -0.13911900 | -0.27104600 |
| H | -6.50904800 | 0.41990200  | -1.04661600 |
| C | 1.73662900  | 1.53743600  | 1.61659900  |
| C | 0.83073400  | 1.46995900  | 2.85962700  |
| C | 3.16927000  | 1.13281900  | 1.95446900  |
| C | 1.32649000  | 0.40058100  | 3.85023000  |
| C | 3.23173600  | -0.34012900 | 2.36798600  |
| C | 1.94338600  | -0.77335700 | 3.09479300  |
| H | 1.33311200  | 0.87137800  | 0.84334400  |
| H | 2.08047500  | 0.82946300  | 4.52022000  |
| H | 3.54534700  | 1.72863300  | 2.79576100  |
| H | 1.70828400  | 2.54529000  | 1.18930200  |
| H | 0.85941500  | 2.44733000  | 3.36406600  |
| H | 3.84181700  | 1.31199500  | 1.11122900  |
| H | 0.49133200  | 0.07473000  | 4.48212400  |
| H | 3.36077400  | -0.96280800 | 1.46849300  |
| H | 2.17281500  | -1.61018100 | 3.76532700  |
| H | 1.22041800  | -1.14656300 | 2.35831800  |
| N | -0.54559500 | 1.15529800  | 2.42802300  |
| H | -1.18581200 | 1.34221500  | 3.19899000  |
| H | -0.81884400 | 1.80475300  | 1.68004200  |
| O | 4.37540200  | -0.47149800 | 3.20455500  |
| H | 4.54156700  | -1.40576900 | 3.37253500  |

### INT3-1<sub>b</sub>

|   |            |             |             |
|---|------------|-------------|-------------|
| C | 1.45013300 | -2.49587300 | -0.18403500 |
| C | 0.56525900 | -2.54816200 | -1.43376400 |
| C | 2.83593500 | -3.05865000 | -0.49507600 |
| C | 1.37676000 | -2.18085800 | -2.70421500 |
| C | 3.59276500 | -2.16236400 | -1.48534200 |
| C | 2.63223100 | -1.36759200 | -2.38043200 |
| H | 1.53721400 | -1.45124500 | 0.14514000  |
| H | 1.68276100 | -3.10392700 | -3.21130900 |
| H | 2.73319500 | -4.04696700 | -0.96177200 |

|    |             |             |             |
|----|-------------|-------------|-------------|
| H  | 0.97636600  | -3.05620900 | 0.63228800  |
| H  | 0.21324600  | -3.58496900 | -1.54566200 |
| H  | 3.42653800  | -3.20308900 | 0.41522700  |
| H  | 0.73530500  | -1.62903800 | -3.40030900 |
| H  | 4.22304800  | -1.45232900 | -0.92763000 |
| H  | 3.15228300  | -1.08679200 | -3.30396600 |
| H  | 2.35973200  | -0.42420600 | -1.89529300 |
| N  | -0.65098400 | -1.74492100 | -1.20962100 |
| H  | -1.28606700 | -1.89892800 | -1.99250900 |
| H  | -1.19849700 | -1.57349500 | 0.35166300  |
| O  | 4.42576600  | -3.04134100 | -2.23636600 |
| H  | 4.96721500  | -2.51805900 | -2.83825400 |
| C  | -0.21898800 | 4.80838300  | -0.85453300 |
| C  | 1.00002500  | 4.60488300  | -1.75397500 |
| N  | 0.09147800  | 2.47460800  | -1.18627700 |
| H  | -1.04340000 | 5.34076500  | -1.33656100 |
| H  | 1.93068400  | 4.99495200  | -1.33383900 |
| C  | 1.11412300  | 3.07775300  | -1.87692500 |
| O  | 1.99658100  | 2.49476900  | -2.48226300 |
| C  | -0.67401700 | 3.38043800  | -0.53860500 |
| O  | -1.59747200 | 3.10966600  | 0.23587600  |
| Br | -0.30175000 | 0.23129500  | -1.25817500 |
| H  | -0.00103100 | 5.32537800  | 0.08386600  |
| H  | 0.88964700  | 5.02952000  | -2.75490500 |
| C  | -3.66311500 | -2.40528700 | 1.11786400  |
| C  | -2.94108000 | -1.10973300 | 1.51558200  |
| C  | -5.11520300 | -2.10075700 | 0.74742100  |
| C  | -3.41545900 | 0.09376000  | 0.67950300  |
| C  | -5.19873600 | -1.22360400 | -0.51180000 |
| C  | -3.93465200 | -0.36704200 | -0.67982700 |
| H  | -3.14941800 | -2.85261000 | 0.25554500  |
| H  | -4.23779000 | 0.58174500  | 1.21492100  |
| H  | -5.59586000 | -1.54645400 | 1.56289900  |
| H  | -3.61145900 | -3.13579200 | 1.93247800  |
| H  | -3.11802200 | -0.90047500 | 2.57701700  |
| H  | -5.68827000 | -3.02126200 | 0.61065300  |
| H  | -2.62600900 | 0.84407500  | 0.56930200  |
| H  | -5.32145200 | -1.86390200 | -1.39834700 |
| H  | -4.14914200 | 0.49687200  | -1.31836500 |
| H  | -3.16258900 | -0.94625400 | -1.20013800 |
| N  | -1.46476000 | -1.30053600 | 1.36970100  |
| H  | -0.97380900 | -0.38845200 | 1.66696200  |
| H  | -1.14276000 | -2.05261200 | 1.98095000  |
| O  | -6.36006200 | -0.42115200 | -0.34153500 |
| H  | -6.49473200 | 0.11389900  | -1.13195400 |
| C  | 1.76678000  | 1.50975400  | 1.58378500  |
| C  | 0.79176100  | 1.48005400  | 2.77445800  |



|   |             |             |            |
|---|-------------|-------------|------------|
| C | 3.17072700  | 1.09231600  | 2.01486900 |
| C | 1.20847200  | 0.41404400  | 3.80534100 |
| C | 3.18940000  | -0.37320200 | 2.45922200 |
| C | 1.84689800  | -0.77846500 | 3.09760600 |
| H | 1.39948700  | 0.83756700  | 0.79860800 |
| H | 1.93264200  | 0.83525200  | 4.51188800 |
| H | 3.50455900  | 1.69935000  | 2.86583900 |
| H | 1.77876700  | 2.50805700  | 1.13537400 |
| H | 0.81070700  | 2.46357600  | 3.26612200 |
| H | 3.89348900  | 1.24776100  | 1.20963000 |
| H | 0.33315700  | 0.11199100  | 4.39356300 |
| H | 3.37774700  | -1.01505900 | 1.58457300 |
| H | 2.01123000  | -1.61776200 | 3.78392400 |
| H | 1.17122700  | -1.13670800 | 2.30975300 |
| N | -0.57101900 | 1.18506000  | 2.28363800 |
| H | -1.24229600 | 1.41860600  | 3.01520600 |
| H | -0.81176000 | 1.80715200  | 1.50051400 |
| O | 4.26525800  | -0.49844600 | 3.38214300 |
| H | 4.42167800  | -1.43148000 | 3.56537300 |

**INT3<sub>b</sub>**

|   |             |             |             |
|---|-------------|-------------|-------------|
| C | 2.32068700  | -1.99790100 | 0.23012100  |
| C | 1.68797200  | -2.58532200 | -1.03527700 |
| C | 3.84348200  | -2.08539800 | 0.13597200  |
| C | 2.49502900  | -2.19872300 | -2.30031400 |
| C | 4.39348800  | -1.18804500 | -0.98197000 |
| C | 3.33998600  | -0.94405700 | -2.07135800 |
| H | 2.00279800  | -0.95204400 | 0.34047200  |
| H | 3.16973800  | -3.02333400 | -2.55854900 |
| H | 4.13422200  | -3.11602100 | -0.10506900 |
| H | 1.94926800  | -2.53616100 | 1.10888400  |
| H | 1.70979400  | -3.68048100 | -0.93580500 |
| H | 4.32115300  | -1.84402500 | 1.09040300  |
| H | 1.81535200  | -2.06287700 | -3.14798700 |
| H | 4.70028200  | -0.21775200 | -0.56103800 |
| H | 3.84112500  | -0.64267200 | -2.99890000 |
| H | 2.69674400  | -0.10509700 | -1.78101900 |
| N | 0.24310500  | -2.28965100 | -1.05512600 |
| H | -0.19255000 | -2.87415500 | -1.76784400 |
| H | -0.39854700 | -1.78104000 | 0.91278800  |
| O | 5.53943400  | -1.86242400 | -1.49098700 |
| H | 5.98046400  | -1.29463100 | -2.13287700 |
| C | -3.11027200 | 4.26623100  | -1.34608600 |
| C | -2.45871400 | 3.72850700  | -2.61993500 |
| N | -1.66300300 | 2.45321500  | -0.76636200 |
| H | -4.19718800 | 4.15150200  | -1.32219700 |
| H | -1.83094200 | 4.45877200  | -3.13720600 |

|    |             |             |             |
|----|-------------|-------------|-------------|
| C  | -1.57036000 | 2.58257600  | -2.11983100 |
| O  | -0.87361300 | 1.88673000  | -2.85121500 |
| C  | -2.49914900 | 3.39739900  | -0.24428600 |
| O  | -2.72039500 | 3.53444700  | 0.95784800  |
| Br | -0.17539700 | -0.52001800 | -1.67497500 |
| H  | -2.88789800 | 5.31553500  | -1.13671600 |
| H  | -3.16748900 | 3.33194800  | -3.35104900 |
| C  | -2.49305000 | -2.95533300 | 2.25638300  |
| C  | -2.11593800 | -1.47998300 | 2.00497700  |
| C  | -3.96095500 | -3.21319000 | 1.91536300  |
| C  | -2.91797800 | -0.91057100 | 0.81605300  |
| C  | -4.21001800 | -3.03147100 | 0.41149200  |
| C  | -3.22842500 | -2.01435900 | -0.19355200 |
| H  | -1.85356900 | -3.59205800 | 1.62849300  |
| H  | -3.86584700 | -0.49710500 | 1.17959900  |
| H  | -4.59684400 | -2.49130400 | 2.44288700  |
| H  | -2.27742800 | -3.22559200 | 3.29607100  |
| H  | -2.36916000 | -0.89951100 | 2.90261300  |
| H  | -4.28109000 | -4.20872700 | 2.23483100  |
| H  | -2.37800300 | -0.08642700 | 0.33935100  |
| H  | -4.08716200 | -3.99922100 | -0.09896600 |
| H  | -3.64688800 | -1.59537500 | -1.11618600 |
| H  | -2.29976600 | -2.52582400 | -0.47878200 |
| N  | -0.66659200 | -1.30187300 | 1.77928400  |
| H  | -0.47444500 | 0.52717500  | 1.58810000  |
| H  | -0.15210400 | -1.75913900 | 2.53098600  |
| O  | -5.56045400 | -2.60071500 | 0.28733600  |
| H  | -5.78218200 | -2.51986700 | -0.64709400 |
| C  | 1.57289200  | 2.07108900  | 0.46802400  |
| C  | 0.61218800  | 2.36759600  | 1.63287300  |
| C  | 3.02074500  | 2.30003000  | 0.89270300  |
| C  | 1.26080100  | 2.07129400  | 2.99469900  |
| C  | 3.43488600  | 1.30273400  | 1.98101700  |
| C  | 2.23877700  | 0.90462800  | 2.86511800  |
| H  | 1.44103600  | 1.02615300  | 0.16087700  |
| H  | 1.80656000  | 2.95643600  | 3.33992900  |
| H  | 3.14182000  | 3.30915600  | 1.30546100  |
| H  | 1.30014000  | 2.66969300  | -0.40594500 |
| H  | 0.28752300  | 3.41276600  | 1.59222100  |
| H  | 3.69947100  | 2.22706800  | 0.03785500  |
| H  | 0.48402600  | 1.86885300  | 3.74056500  |
| H  | 3.84217200  | 0.39581800  | 1.50864700  |
| H  | 2.60673100  | 0.58350400  | 3.84618800  |
| H  | 1.72441900  | 0.04070000  | 2.42200500  |
| N  | -0.61591300 | 1.55642100  | 1.43406700  |
| H  | -1.38133800 | 1.90276400  | 2.01990900  |
| H  | -0.99174600 | 1.75755700  | 0.39855000  |

|   |            |            |            |
|---|------------|------------|------------|
| O | 4.45528300 | 1.94586400 | 2.73488800 |
| H | 4.85458600 | 1.31130900 | 3.34054700 |

**TS4<sub>b</sub>**

|    |             |             |             |
|----|-------------|-------------|-------------|
| C  | 2.36960000  | -1.95084500 | 0.26329000  |
| C  | 1.76505300  | -2.56628500 | -1.00248100 |
| C  | 3.89512500  | -2.01303000 | 0.19143100  |
| C  | 2.57926200  | -2.17807700 | -2.26251200 |
| C  | 4.44816200  | -1.12784200 | -0.93528000 |
| C  | 3.40233200  | -0.90834100 | -2.03667600 |
| H  | 2.03168100  | -0.90958500 | 0.35687800  |
| H  | 3.26989300  | -2.99405300 | -2.50582300 |
| H  | 4.20773300  | -3.04275400 | -0.02498700 |
| H  | 1.99645100  | -2.48438600 | 1.14402500  |
| H  | 1.80711200  | -3.65958400 | -0.88957500 |
| H  | 4.35310500  | -1.74494400 | 1.14844100  |
| H  | 1.90654600  | -2.06133800 | -3.11868800 |
| H  | 4.74486700  | -0.14914900 | -0.52714700 |
| H  | 3.90813400  | -0.60731900 | -2.96182600 |
| H  | 2.74407000  | -0.07679800 | -1.75887500 |
| N  | 0.31450200  | -2.30218300 | -1.04548600 |
| H  | -0.09637600 | -2.89105000 | -1.76936600 |
| H  | -0.35456300 | -1.81353200 | 0.93428800  |
| O  | 5.60299000  | -1.80144800 | -1.42566300 |
| H  | 6.04935700  | -1.23640200 | -2.06625300 |
| C  | -3.40497900 | 4.00936800  | -1.42027100 |
| C  | -2.61701700 | 3.54769200  | -2.64675000 |
| N  | -1.76571000 | 2.41758600  | -0.73356200 |
| H  | -4.46360100 | 3.73799700  | -1.44947800 |
| H  | -2.05907500 | 4.34922600  | -3.13780000 |
| C  | -1.61779900 | 2.53071300  | -2.08555500 |
| O  | -0.80604100 | 1.91514000  | -2.76489300 |
| C  | -2.74068900 | 3.25876900  | -0.26522800 |
| O  | -3.02625000 | 3.38577600  | 0.91887300  |
| Br | -0.12118900 | -0.53792900 | -1.66090400 |
| H  | -3.34767400 | 5.08326900  | -1.22747200 |
| H  | -3.22489200 | 3.05819900  | -3.41138600 |
| C  | -2.44995800 | -2.96293300 | 2.28819900  |
| C  | -2.07241700 | -1.49024400 | 2.01682900  |
| C  | -3.91370600 | -3.23101300 | 1.93736900  |
| C  | -2.87560100 | -0.93899900 | 0.82066700  |
| C  | -4.14817500 | -3.07366100 | 0.42859600  |
| C  | -3.17021200 | -2.05487900 | -0.18030400 |
| H  | -1.80333500 | -3.60785000 | 1.67606500  |
| H  | -3.82886300 | -0.53082700 | 1.17615300  |
| H  | -4.55722100 | -2.50322800 | 2.44716900  |
| H  | -2.24303700 | -3.21710700 | 3.33365300  |

|   |             |             |             |
|---|-------------|-------------|-------------|
| H | -2.32611100 | -0.89684900 | 2.90563700  |
| H | -4.23412300 | -4.22268200 | 2.26855900  |
| H | -2.33918600 | -0.11402800 | 0.34247700  |
| H | -4.01013400 | -4.04743500 | -0.06630400 |
| H | -3.58650200 | -1.64923500 | -1.11006400 |
| H | -2.23545300 | -2.56164300 | -0.45454600 |
| N | -0.62501700 | -1.31312800 | 1.78684200  |
| H | -0.44641300 | 0.57836600  | 1.52806000  |
| H | -0.10911800 | -1.74724500 | 2.55101800  |
| O | -5.50162100 | -2.65861900 | 0.28324100  |
| H | -5.71373200 | -2.59484800 | -0.65472000 |
| C | 1.54278000  | 2.14221500  | 0.41352100  |
| C | 0.57968400  | 2.43257400  | 1.57923900  |
| C | 2.99015900  | 2.39623900  | 0.82601800  |
| C | 1.24897200  | 2.17828600  | 2.94100100  |
| C | 3.42320700  | 1.41648400  | 1.92256500  |
| C | 2.24079300  | 1.02217100  | 2.82646400  |
| H | 1.42587200  | 1.09244700  | 0.11695200  |
| H | 1.78635200  | 3.07790100  | 3.26198900  |
| H | 3.10092500  | 3.41158300  | 1.22622700  |
| H | 1.25915600  | 2.72771400  | -0.46632400 |
| H | 0.23839800  | 3.47272900  | 1.52625300  |
| H | 3.66501700  | 2.32113700  | -0.03194300 |
| H | 0.48218400  | 1.98040800  | 3.69817000  |
| H | 3.83015900  | 0.50598900  | 1.45676200  |
| H | 2.62270100  | 0.72580700  | 3.81020200  |
| H | 1.73265300  | 0.14249400  | 2.40757600  |
| N | -0.62730600 | 1.59582800  | 1.39255800  |
| H | -1.37856500 | 1.88902400  | 2.02223100  |
| H | -1.08822400 | 1.83971100  | 0.29768300  |
| O | 4.45011900  | 2.07494000  | 2.65466900  |
| H | 4.84912000  | 1.45419600  | 3.27468700  |

#### INT4<sub>b</sub>

|   |            |             |             |
|---|------------|-------------|-------------|
| C | 2.39514100 | -1.93808300 | 0.18416900  |
| C | 1.75037500 | -2.49157700 | -1.09021700 |
| C | 3.91674600 | -2.04125700 | 0.07630300  |
| C | 2.54624500 | -2.07954700 | -2.35389700 |
| C | 4.47571300 | -1.14008800 | -1.03520800 |
| C | 3.41145000 | -0.84379000 | -2.09995900 |
| H | 2.08748800 | -0.89295400 | 0.32742600  |
| H | 3.20621100 | -2.90502100 | -2.64495200 |
| H | 4.19436300 | -3.07278100 | -0.17639600 |
| H | 2.02701300 | -2.49545100 | 1.05176300  |
| H | 1.76213400 | -3.58922200 | -1.01733300 |
| H | 4.40037900 | -1.81500400 | 1.03122400  |
| H | 1.85697000 | -1.91081200 | -3.18826600 |

|    |             |             |             |
|----|-------------|-------------|-------------|
| H  | 4.82270700  | -0.18877500 | -0.60472900 |
| H  | 3.90407000  | -0.52168100 | -3.02510800 |
| H  | 2.78622700  | -0.00495000 | -1.77170900 |
| N  | 0.30422200  | -2.19665600 | -1.09683800 |
| H  | -0.12876100 | -2.73150600 | -1.84963400 |
| H  | -0.27643800 | -1.74573800 | 0.98940900  |
| O  | 5.58847000  | -1.84249000 | -1.58146700 |
| H  | 6.05358100  | -1.26475500 | -2.19685200 |
| C  | -4.09794400 | 2.87761800  | -1.73478200 |
| C  | -2.98714700 | 2.82683400  | -2.78802100 |
| N  | -2.04501200 | 2.40403000  | -0.67117000 |
| H  | -4.86937100 | 2.11645500  | -1.87454400 |
| H  | -2.82827100 | 3.77711200  | -3.30365200 |
| C  | -1.72441800 | 2.48776200  | -2.00386300 |
| O  | -0.61515500 | 2.31047300  | -2.47114500 |
| C  | -3.38851400 | 2.60514200  | -0.41088900 |
| O  | -3.89563300 | 2.56355300  | 0.68772300  |
| Br | -0.08488000 | -0.39086600 | -1.60786900 |
| H  | -4.60106500 | 3.84491300  | -1.66794800 |
| H  | -3.13583600 | 2.06024300  | -3.55201300 |
| C  | -2.36428200 | -2.82312100 | 2.41880100  |
| C  | -1.92861700 | -1.36536800 | 2.14612500  |
| C  | -3.84631600 | -3.02562300 | 2.10210600  |
| C  | -2.74983200 | -0.76624400 | 0.98819300  |
| C  | -4.10293800 | -2.85733000 | 0.59947300  |
| C  | -3.11555400 | -1.85282900 | -0.02141000 |
| H  | -1.76145700 | -3.49143500 | 1.78679400  |
| H  | -3.67121000 | -0.31578900 | 1.37391200  |
| H  | -4.44484900 | -2.26958500 | 2.62528000  |
| H  | -2.14292100 | -3.09449400 | 3.45695500  |
| H  | -2.12108500 | -0.76886800 | 3.04779200  |
| H  | -4.20472500 | -4.00261100 | 2.43831400  |
| H  | -2.17984200 | 0.03945900  | 0.51863300  |
| H  | -3.98756300 | -3.83190400 | 0.09956500  |
| H  | -3.55398800 | -1.41853500 | -0.92918000 |
| H  | -2.20626400 | -2.38124800 | -0.33872100 |
| N  | -0.48896100 | -1.24451700 | 1.85588000  |
| H  | -0.29652700 | 0.83272300  | 1.61703800  |
| H  | 0.04191300  | -1.70546500 | 2.59339900  |
| O  | -5.45244000 | -2.42243900 | 0.47568100  |
| H  | -5.67783600 | -2.35567900 | -0.45875500 |
| C  | 1.67635800  | 2.19607500  | 0.41771700  |
| C  | 0.80857100  | 2.58583000  | 1.62902600  |
| C  | 3.16316000  | 2.37135800  | 0.71770400  |
| C  | 1.57016000  | 2.33673200  | 2.94970700  |
| C  | 3.60972000  | 1.39803300  | 1.81417200  |
| C  | 2.47149100  | 1.11226400  | 2.80937800  |

|   |             |            |             |
|---|-------------|------------|-------------|
| H | 1.47529600  | 1.14357000 | 0.18073200  |
| H | 2.19047900  | 3.20650800 | 3.19823100  |
| H | 3.36338200  | 3.38917100 | 1.07509600  |
| H | 1.36814500  | 2.75853900 | -0.46908000 |
| H | 0.56320300  | 3.65370900 | 1.56530200  |
| H | 3.77161000  | 2.22846300 | -0.18136200 |
| H | 0.84993200  | 2.21425900 | 3.76640900  |
| H | 3.92170200  | 0.44839700 | 1.35268400  |
| H | 2.90155000  | 0.81522700 | 3.77362300  |
| H | 1.87480100  | 0.25951000 | 2.45515400  |
| N | -0.45757100 | 1.84579200 | 1.53175200  |
| H | -1.08829800 | 2.10974000 | 2.28790000  |
| H | -1.35624400 | 2.17641200 | 0.11231500  |
| O | 4.73172800  | 2.00258700 | 2.44913600  |
| H | 5.09828700  | 1.38941700 | 3.09616600  |

## M2

|    |             |             |             |
|----|-------------|-------------|-------------|
| C  | 0.65810200  | 1.38200900  | -0.57628200 |
| C  | 0.07408100  | 0.93363600  | 0.76359500  |
| C  | 2.15921600  | 1.09366500  | -0.59553000 |
| C  | 0.67779000  | -0.41297500 | 1.23019700  |
| C  | 2.44214600  | -0.41356200 | -0.57774600 |
| C  | 1.29224300  | -1.19538800 | 0.06950200  |
| H  | 0.16317000  | 0.84884600  | -1.39520600 |
| H  | 1.45865900  | -0.21355600 | 1.96959800  |
| H  | 2.61738000  | 1.52605700  | 0.30096600  |
| H  | 0.46032400  | 2.44535200  | -0.72086200 |
| H  | 0.32564400  | 1.69844200  | 1.50986000  |
| H  | 2.64049600  | 1.55998800  | -1.45642500 |
| H  | -0.09005600 | -1.00366500 | 1.73689500  |
| H  | 2.58205300  | -0.77646900 | -1.60237500 |
| H  | 1.66572800  | -2.16489600 | 0.41150100  |
| H  | 0.53017300  | -1.40183100 | -0.68650400 |
| N  | -1.39646900 | 1.02636400  | 0.74280400  |
| H  | -1.74286100 | 0.82830200  | 1.68033100  |
| O  | 3.66421200  | -0.58553200 | 0.14460400  |
| H  | 3.92329700  | -1.51022700 | 0.08546300  |
| Br | -2.22554000 | -0.36174100 | -0.28777500 |

## COM2'b

|   |             |             |             |
|---|-------------|-------------|-------------|
| C | -3.58466600 | 0.15261100  | -2.74906100 |
| C | -4.38204500 | 1.44692500  | -2.50148300 |
| C | -2.09336900 | 0.36483000  | -2.49299500 |
| C | -3.68702800 | 2.32524800  | -1.44499300 |
| C | -1.85093100 | 0.65132000  | -1.00767900 |
| C | -3.01908100 | 1.44594000  | -0.39231600 |
| H | -3.96319300 | -0.61685500 | -2.06114600 |

|    |             |             |             |
|----|-------------|-------------|-------------|
| H  | -2.92909400 | 2.95729300  | -1.92243000 |
| H  | -1.72712600 | 1.22532100  | -3.06683600 |
| H  | -3.76246600 | -0.21445600 | -3.76528200 |
| H  | -4.42357500 | 2.01310900  | -3.44649900 |
| H  | -1.50452000 | -0.50089700 | -2.81028300 |
| H  | -4.42436700 | 2.99686900  | -0.99063000 |
| H  | -1.76393800 | -0.31221000 | -0.47627200 |
| H  | -2.64582800 | 2.03858500  | 0.45031500  |
| H  | -3.76928800 | 0.75219300  | 0.00992400  |
| N  | -5.71916200 | 1.08708000  | -2.01582200 |
| H  | -6.32579300 | 1.90216400  | -1.99339300 |
| H  | -6.15478600 | 0.40754600  | -2.63388700 |
| O  | -0.61891100 | 1.35158900  | -0.90224500 |
| H  | -0.44036600 | 1.55291100  | 0.06938000  |
| C  | 3.78565200  | -3.66901100 | -0.51379900 |
| C  | 3.44699700  | -3.84784100 | -1.99782300 |
| N  | 2.24631000  | -2.01461400 | -1.14600900 |
| H  | 4.84027000  | -3.45520800 | -0.32620700 |
| H  | 2.98353100  | -4.80985700 | -2.22776800 |
| C  | 2.44655900  | -2.74796800 | -2.32200500 |
| O  | 1.91234700  | -2.52643700 | -3.37589300 |
| C  | 2.96794700  | -2.47150900 | -0.05690800 |
| O  | 2.93807200  | -1.99551300 | 1.05549500  |
| Br | 1.09615100  | -0.55041600 | -1.05990700 |
| H  | 3.50786900  | -4.52577700 | 0.10439500  |
| H  | 4.30794100  | -3.73062400 | -2.65985100 |
| C  | 0.82132400  | 4.08307400  | 1.38004200  |
| C  | 1.12231900  | 2.67462800  | 1.92279600  |
| C  | 2.11477000  | 4.79471700  | 0.98167500  |
| C  | 2.34644800  | 2.06259000  | 1.21502900  |
| C  | 2.78577100  | 4.08683000  | -0.20312600 |
| C  | 2.45141100  | 2.58720200  | -0.21645400 |
| H  | 0.16698900  | 3.98656200  | 0.50238100  |
| H  | 3.25801400  | 2.34177700  | 1.75668300  |
| H  | 2.82236900  | 4.77408200  | 1.82011000  |
| H  | 0.26860000  | 4.66584800  | 2.12528700  |
| H  | 1.35297100  | 2.75715200  | 2.99660100  |
| H  | 1.93789600  | 5.84710800  | 0.74321600  |
| H  | 2.28165400  | 0.96912400  | 1.24688500  |
| H  | 2.44018800  | 4.53977200  | -1.14445600 |
| H  | 3.21978100  | 2.04534600  | -0.78154400 |
| H  | 1.50638000  | 2.42917900  | -0.74930100 |
| N  | -0.05342400 | 1.80836200  | 1.71687400  |
| H  | 0.12284500  | 0.88401900  | 2.13679000  |
| H  | -0.85761200 | 2.20806900  | 2.19988400  |
| O  | 4.18524300  | 4.31636200  | -0.05584300 |
| H  | 4.64211500  | 3.95139000  | -0.82174900 |

|   |             |             |            |
|---|-------------|-------------|------------|
| C | -0.61808700 | -2.57951100 | 1.66902800 |
| C | -0.36300300 | -1.92343900 | 3.03702000 |
| C | -2.05127000 | -3.09847200 | 1.56881700 |
| C | -1.64969500 | -1.26544500 | 3.57611700 |
| C | -3.05183800 | -1.93670800 | 1.59667800 |
| C | -2.50584400 | -0.75571700 | 2.41819100 |
| H | -0.43898800 | -1.83321600 | 0.88516300 |
| H | -2.23242000 | -1.99177100 | 4.15523000 |
| H | -2.27723900 | -3.74728500 | 2.42440600 |
| H | 0.10626700  | -3.38528300 | 1.50381700 |
| H | -0.05749400 | -2.71166300 | 3.74321600 |
| H | -2.20047400 | -3.69923000 | 0.66724100 |
| H | -1.37763600 | -0.45322200 | 4.26022000 |
| H | -3.24963700 | -1.59829400 | 0.56783200 |
| H | -3.34487800 | -0.14374800 | 2.77102300 |
| H | -1.89588600 | -0.11139800 | 1.77104400 |
| N | 0.68795600  | -0.90627700 | 2.88545200 |
| H | 1.10584900  | -0.69633700 | 3.78883000 |
| H | 1.43724400  | -1.24951600 | 2.28420400 |
| O | -4.25164600 | -2.45757200 | 2.15945900 |
| H | -4.95410300 | -1.80508700 | 2.05844100 |

**TS3'b**

|   |             |             |             |
|---|-------------|-------------|-------------|
| C | 3.29519100  | -2.44119200 | 2.32419200  |
| C | 4.54690600  | -2.01888500 | 1.53389100  |
| C | 2.09696100  | -1.56279800 | 1.96813700  |
| C | 4.15903400  | -1.45402200 | 0.15341500  |
| C | 1.68999500  | -1.75404400 | 0.49225600  |
| C | 2.90413400  | -2.14977700 | -0.36538900 |
| H | 3.07027400  | -3.48710800 | 2.07488800  |
| H | 3.96352800  | -0.37679700 | 0.23468200  |
| H | 2.35723400  | -0.50315000 | 2.09805300  |
| H | 3.49948100  | -2.40800500 | 3.39999000  |
| H | 5.05714800  | -1.22163800 | 2.10001100  |
| H | 1.24761100  | -1.75765000 | 2.62886400  |
| H | 5.00066300  | -1.57741800 | -0.53809600 |
| H | 0.92760400  | -2.55302300 | 0.42782200  |
| H | 2.69042600  | -1.88491400 | -1.40772100 |
| H | 3.06188800  | -3.23479700 | -0.32889900 |
| N | 5.40265100  | -3.19529800 | 1.34690900  |
| H | 6.30955600  | -2.92796200 | 0.97454000  |
| H | 5.56877200  | -3.66161300 | 2.23488800  |
| O | 1.16047200  | -0.56022800 | -0.03249700 |
| H | 0.88335300  | 0.24204800  | -1.53889400 |
| C | -4.27477800 | 1.94990900  | 2.18812000  |
| C | -3.97276600 | 1.10011900  | 3.42241700  |
| N | -2.32807700 | 0.67365800  | 1.75939700  |



|    |             |             |             |
|----|-------------|-------------|-------------|
| H  | -4.21875700 | 3.02657300  | 2.36931600  |
| H  | -4.74944000 | 0.36502400  | 3.64773600  |
| C  | -2.68834600 | 0.35004800  | 3.05910900  |
| O  | -2.08558000 | -0.40735700 | 3.78541700  |
| C  | -3.17493600 | 1.57048100  | 1.20086500  |
| O  | -3.09066100 | 2.02571400  | 0.05808300  |
| Br | -0.53778800 | 0.01673100  | 0.88096000  |
| H  | -5.24533100 | 1.74544600  | 1.72919800  |
| H  | -3.79429100 | 1.67999600  | 4.33068400  |
| C  | 2.64273500  | 2.15145800  | -2.29704500 |
| C  | 1.10243600  | 2.18129500  | -2.26088500 |
| C  | 3.22022600  | 3.40995700  | -1.64670800 |
| C  | 0.59577700  | 2.88553200  | -0.98708100 |
| C  | 2.88868000  | 3.45597300  | -0.14734300 |
| C  | 1.59325200  | 2.69172100  | 0.15534400  |
| H  | 2.98809200  | 1.26283200  | -1.74935500 |
| H  | 0.49586000  | 3.95843300  | -1.18817800 |
| H  | 2.77877200  | 4.30244700  | -2.10785300 |
| H  | 2.99519800  | 2.04506900  | -3.32900900 |
| H  | 0.73319000  | 2.72701700  | -3.13945000 |
| H  | 4.30048600  | 3.47715700  | -1.80113700 |
| H  | -0.39976300 | 2.51907300  | -0.71482000 |
| H  | 3.71392300  | 3.00502300  | 0.42440500  |
| H  | 1.16998200  | 3.04067800  | 1.10472800  |
| H  | 1.81034500  | 1.62526200  | 0.28694800  |
| N  | 0.54393300  | 0.80812100  | -2.34435400 |
| H  | -0.82270100 | 0.79197500  | -2.31568600 |
| H  | 0.89771300  | 0.34726400  | -3.18380800 |
| O  | 2.78262700  | 4.83732800  | 0.18569900  |
| H  | 2.61891400  | 4.91796700  | 1.13213500  |
| C  | -3.34831600 | -1.01473300 | -1.29566700 |
| C  | -2.76032800 | -0.44800200 | -2.60224400 |
| C  | -3.34970900 | -2.54160200 | -1.31080000 |
| C  | -1.78555700 | -1.44275400 | -3.25551200 |
| C  | -1.91515600 | -3.07497200 | -1.32588900 |
| C  | -0.98788100 | -2.18982000 | -2.18676600 |
| H  | -2.73859600 | -0.67901400 | -0.45107800 |
| H  | -2.35696400 | -2.16435000 | -3.84989600 |
| H  | -3.86553600 | -2.92550200 | -2.20013200 |
| H  | -4.35391700 | -0.61344400 | -1.13728900 |
| H  | -3.57590800 | -0.24176800 | -3.30405000 |
| H  | -3.87978600 | -2.93876600 | -0.44139200 |
| H  | -1.13190000 | -0.91420600 | -3.96030300 |
| H  | -1.52874500 | -3.08745000 | -0.29618400 |
| H  | -0.22203500 | -2.82563300 | -2.64680700 |
| H  | -0.45828800 | -1.48128600 | -1.53955500 |
| N  | -2.06814500 | 0.85496800  | -2.32391300 |

|   |             |             |             |
|---|-------------|-------------|-------------|
| H | -2.30994500 | 1.53819100  | -3.04068000 |
| H | -2.38266900 | 1.25767500  | -1.42028300 |
| O | -1.99752200 | -4.40297500 | -1.83167300 |
| H | -1.15542100 | -4.84860300 | -1.68696100 |

**INT3'-1b**

|    |             |             |             |
|----|-------------|-------------|-------------|
| C  | 3.36358200  | -2.16107900 | 2.47437100  |
| C  | 4.56513300  | -1.87155500 | 1.55730200  |
| C  | 2.13521300  | -1.36160800 | 2.04106700  |
| C  | 4.09401300  | -1.54884800 | 0.12628100  |
| C  | 1.65350100  | -1.81589800 | 0.64816400  |
| C  | 2.82708200  | -2.33450100 | -0.19947100 |
| H  | 3.13947900  | -3.23500700 | 2.41708700  |
| H  | 3.88263400  | -0.47520100 | 0.03706300  |
| H  | 2.38921400  | -0.29470500 | 1.97227400  |
| H  | 3.62290400  | -1.94560500 | 3.51663100  |
| H  | 5.09406200  | -0.98840100 | 1.95352000  |
| H  | 1.32780200  | -1.44386800 | 2.77373800  |
| H  | 4.89961400  | -1.77811100 | -0.58076800 |
| H  | 0.90553800  | -2.61940600 | 0.76905800  |
| H  | 2.55222300  | -2.24697400 | -1.25665300 |
| H  | 3.00756200  | -3.39620700 | 0.00811300  |
| N  | 5.42499300  | -3.05901100 | 1.52138700  |
| H  | 6.31077900  | -2.85144800 | 1.06889000  |
| H  | 5.63669800  | -3.37699200 | 2.46348100  |
| O  | 1.07243100  | -0.74511400 | -0.06692000 |
| H  | 0.86652900  | 0.15018100  | -1.69325500 |
| C  | -4.13881300 | 2.24360400  | 2.24307900  |
| C  | -3.74171800 | 1.51851400  | 3.52763700  |
| N  | -2.28417300 | 0.84639900  | 1.76175300  |
| H  | -4.02029900 | 3.32939900  | 2.29453400  |
| H  | -4.51218000 | 0.84017200  | 3.90258500  |
| C  | -2.52046700 | 0.68709300  | 3.12177100  |
| O  | -1.86580500 | -0.00627100 | 3.86724500  |
| C  | -3.16054000 | 1.70071500  | 1.20681400  |
| O  | -3.20109500 | 2.02602000  | 0.00883900  |
| Br | -0.51185400 | -0.00149100 | 0.82504100  |
| H  | -5.15905700 | 2.04135100  | 1.90770500  |
| H  | -3.45933100 | 2.18199700  | 4.34789100  |
| C  | 2.65484100  | 1.96376300  | -2.57769800 |
| C  | 1.11593800  | 2.04022100  | -2.46580600 |
| C  | 3.31693600  | 3.18928200  | -1.94586200 |
| C  | 0.70566700  | 2.79329300  | -1.18556200 |
| C  | 3.05576100  | 3.23176700  | -0.43308700 |
| C  | 1.73209000  | 2.53818100  | -0.08200600 |
| H  | 2.99546000  | 1.05722500  | -2.05684500 |
| H  | 0.66925700  | 3.87005500  | -1.38894400 |

|   |             |             |             |
|---|-------------|-------------|-------------|
| H | 2.89573200  | 4.10556200  | -2.37799200 |
| H | 2.95222700  | 1.85281100  | -3.62643100 |
| H | 0.72346500  | 2.58446100  | -3.33541100 |
| H | 4.39155400  | 3.21122300  | -2.14713600 |
| H | -0.30064900 | 2.49207800  | -0.87471600 |
| H | 3.87814600  | 2.72547500  | 0.09527200  |
| H | 1.36805000  | 2.89661100  | 0.88832200  |
| H | 1.89529500  | 1.45922000  | 0.03108200  |
| N | 0.49648600  | 0.69794500  | -2.48150300 |
| H | -1.19248500 | 0.67496600  | -2.21327400 |
| H | 0.79092100  | 0.20285700  | -3.32324600 |
| O | 3.04430100  | 4.61122900  | -0.07655700 |
| H | 2.92512000  | 4.68546800  | 0.87704900  |
| C | -3.47661400 | -1.08504700 | -1.04699200 |
| C | -3.00628800 | -0.50969900 | -2.39787700 |
| C | -3.44075400 | -2.61203300 | -1.05919700 |
| C | -2.10566100 | -1.49348700 | -3.15821800 |
| C | -2.00477100 | -3.11701000 | -1.21514900 |
| C | -1.19004500 | -2.23187700 | -2.18231600 |
| H | -2.81794100 | -0.73092000 | -0.24886300 |
| H | -2.73744400 | -2.21501300 | -3.68743000 |
| H | -4.03416600 | -3.01346100 | -1.89033100 |
| H | -4.47861100 | -0.71238400 | -0.81511000 |
| H | -3.87757300 | -0.26374100 | -3.01249900 |
| H | -3.87296100 | -3.01360300 | -0.13925000 |
| H | -1.53310000 | -0.95791600 | -3.92517300 |
| H | -1.51269700 | -3.10264400 | -0.23169100 |
| H | -0.47821200 | -2.86336800 | -2.72656300 |
| H | -0.59327000 | -1.51634000 | -1.60517800 |
| N | -2.26882600 | 0.78583700  | -2.17379700 |
| H | -2.49331400 | 1.45285900  | -2.91210600 |
| H | -2.54491900 | 1.24070800  | -1.25475100 |
| O | -2.11487800 | -4.45616000 | -1.68501000 |
| H | -1.25067000 | -4.87973900 | -1.63623000 |

### **INT3'b**

|   |             |             |             |
|---|-------------|-------------|-------------|
| C | -4.37026900 | -1.07209700 | -2.30462600 |
| C | -5.32259400 | -0.37351300 | -1.31672200 |
| C | -2.93540800 | -0.56932600 | -2.14723400 |
| C | -4.58050400 | 0.02273800  | -0.02661200 |
| C | -2.38343100 | -0.94947300 | -0.76330300 |
| C | -3.49746800 | -1.00347900 | 0.29197700  |
| H | -4.40140400 | -2.15143000 | -2.10258200 |
| H | -4.11813000 | 1.00993500  | -0.14652500 |
| H | -2.90737100 | 0.52534000  | -2.22817000 |
| H | -4.72013800 | -0.93079200 | -3.33250100 |
| H | -5.70030400 | 0.54635800  | -1.79261700 |

|    |             |             |             |
|----|-------------|-------------|-------------|
| H  | -2.29083900 | -0.96115500 | -2.93825500 |
| H  | -5.30076700 | 0.10349500  | 0.79498000  |
| H  | -1.87371100 | -1.92422800 | -0.81956800 |
| H  | -3.05215400 | -0.83562800 | 1.27899300  |
| H  | -3.94744000 | -2.00389300 | 0.30139900  |
| N  | -6.40295700 | -1.30408300 | -0.97564800 |
| H  | -7.13497700 | -0.83269500 | -0.45167800 |
| H  | -6.83263800 | -1.68094900 | -1.81632000 |
| O  | -1.45204200 | 0.02315300  | -0.29376900 |
| H  | -0.74006500 | 0.64727100  | 1.43151400  |
| C  | 5.53679300  | 0.17732800  | -1.69117500 |
| C  | 4.51891200  | 0.34465300  | -2.81995800 |
| N  | 3.32807700  | 0.00271700  | -0.78222400 |
| H  | 6.16107400  | 1.05868100  | -1.52344800 |
| H  | 4.58510900  | -0.42262700 | -3.59557300 |
| C  | 3.17322800  | 0.21012900  | -2.10441400 |
| O  | 2.08725400  | 0.28588800  | -2.69579400 |
| C  | 4.65847700  | -0.04904500 | -0.45754800 |
| O  | 5.07714100  | -0.25391000 | 0.67666900  |
| Br | 0.11441600  | 0.10607900  | -1.33593900 |
| H  | 6.20471200  | -0.67853700 | -1.81614600 |
| H  | 4.55981100  | 1.31713300  | -3.31695700 |
| C  | -1.23243800 | 3.10282700  | 2.53009900  |
| C  | 0.08112800  | 2.32816600  | 2.29093000  |
| C  | -1.11959700 | 4.54171700  | 2.02449200  |
| C  | 0.77016000  | 2.81852300  | 1.00158300  |
| C  | -0.94923800 | 4.57398500  | 0.49846000  |
| C  | -0.27300600 | 3.29191200  | -0.01001900 |
| H  | -2.04557600 | 2.58923500  | 1.99697200  |
| H  | 1.42994200  | 3.66152700  | 1.23706800  |
| H  | -0.23438300 | 5.01910700  | 2.46303400  |
| H  | -1.49398100 | 3.07982000  | 3.59392500  |
| H  | 0.75548100  | 2.51106100  | 3.13747600  |
| H  | -1.98309800 | 5.14229500  | 2.32338200  |
| H  | 1.40202300  | 2.02586600  | 0.58594400  |
| H  | -1.93572500 | 4.67510000  | 0.02094200  |
| H  | 0.18191300  | 3.47020800  | -0.99143300 |
| H  | -1.03174800 | 2.51413000  | -0.16418800 |
| N  | -0.13080500 | 0.86890800  | 2.22499700  |
| H  | 1.35263100  | -0.07565700 | 1.82075000  |
| H  | -0.62936000 | 0.56095100  | 3.05925500  |
| O  | -0.16852500 | 5.73149100  | 0.21761100  |
| H  | -0.07022700 | 5.81912900  | -0.73729100 |
| C  | 1.91326900  | -2.75764800 | 0.38396700  |
| C  | 2.11764700  | -2.07275700 | 1.74780800  |
| C  | 1.16365100  | -4.07666200 | 0.56244600  |
| C  | 0.95788000  | -2.38577500 | 2.70954400  |

|   |             |             |             |
|---|-------------|-------------|-------------|
| C | -0.26473500 | -3.82782000 | 1.06562400  |
| C | -0.33866100 | -2.54592400 | 1.91531600  |
| H | 1.33937200  | -2.09497400 | -0.27275200 |
| H | 1.16502900  | -3.32205500 | 3.23929800  |
| H | 1.67046800  | -4.70797800 | 1.30294000  |
| H | 2.88034200  | -2.90833000 | -0.10378500 |
| H | 3.06348700  | -2.40884300 | 2.18220800  |
| H | 1.14009400  | -4.64364500 | -0.37147200 |
| H | 0.88108100  | -1.60195200 | 3.47094200  |
| H | -0.94614700 | -3.73223400 | 0.20727600  |
| H | -1.20955900 | -2.60315700 | 2.57979900  |
| H | -0.49569900 | -1.67401400 | 1.26338100  |
| N | 2.23769200  | -0.59032200 | 1.55597200  |
| H | 3.01833900  | -0.22042400 | 2.10213300  |
| H | 2.51544300  | -0.34155800 | 0.52824300  |
| O | -0.62199200 | -4.97634400 | 1.82727400  |
| H | -1.55698500 | -4.92616100 | 2.05586000  |

**TS4'b**

|   |             |             |             |
|---|-------------|-------------|-------------|
| C | -4.40514800 | -1.15505400 | -2.25022100 |
| C | -5.29112700 | -0.67276200 | -1.08744900 |
| C | -2.93832600 | -0.79033100 | -2.01924800 |
| C | -4.50291400 | -0.67482400 | 0.23617400  |
| C | -2.38824200 | -1.54477600 | -0.79775500 |
| C | -3.48545700 | -1.81219600 | 0.24047400  |
| H | -4.50214700 | -2.24648400 | -2.32496600 |
| H | -3.97914200 | 0.28185000  | 0.36015500  |
| H | -2.84789500 | 0.28665100  | -1.82155700 |
| H | -4.76276700 | -0.73860700 | -3.19761300 |
| H | -5.60411500 | 0.36306700  | -1.29992400 |
| H | -2.33564000 | -1.00042000 | -2.90638600 |
| H | -5.20116700 | -0.76756600 | 1.07515100  |
| H | -1.92134600 | -2.48994500 | -1.11214800 |
| H | -3.01272000 | -1.93757900 | 1.22040000  |
| H | -3.99925400 | -2.75045600 | 0.00083100  |
| N | -6.43256100 | -1.58310000 | -0.96279200 |
| H | -7.11971400 | -1.21622800 | -0.31030100 |
| H | -6.90091900 | -1.70030900 | -1.85735200 |
| O | -1.41111600 | -0.77139200 | -0.09495000 |
| H | -0.85286200 | 0.17510300  | 1.61354300  |
| C | 5.19818800  | 1.98884900  | -1.82451600 |
| C | 4.21113600  | 1.45070900  | -2.86091800 |
| N | 3.35611100  | 0.97637700  | -0.69706100 |
| H | 5.30340400  | 3.07660000  | -1.84362800 |
| H | 4.62608400  | 0.66393100  | -3.49639500 |
| C | 3.08615200  | 0.84706400  | -2.02147700 |
| O | 2.08659900  | 0.31914300  | -2.50608900 |

|    |             |             |             |
|----|-------------|-------------|-------------|
| C  | 4.57727700  | 1.58241400  | -0.48825300 |
| O  | 5.07391700  | 1.75416100  | 0.61073300  |
| Br | 0.07174700  | -0.31939300 | -1.12291100 |
| H  | 6.20038600  | 1.56038900  | -1.89620000 |
| H  | 3.79015800  | 2.21417200  | -3.51921300 |
| C  | -1.97565100 | 2.40552500  | 2.65872100  |
| C  | -0.50275600 | 2.06297700  | 2.33499400  |
| C  | -2.38385800 | 3.74854500  | 2.05123300  |
| C  | -0.09315700 | 2.67694000  | 0.98289600  |
| C  | -2.34632500 | 3.68518100  | 0.51829500  |
| C  | -1.29008800 | 2.67976900  | 0.03225400  |
| H  | -2.61645400 | 1.61241700  | 2.24581100  |
| H  | 0.23864400  | 3.71137500  | 1.12950200  |
| H  | -1.68062700 | 4.52955600  | 2.36562300  |
| H  | -2.13571100 | 2.39927600  | 3.74238000  |
| H  | 0.14041400  | 2.48500100  | 3.11740500  |
| H  | -3.37472200 | 4.06085100  | 2.39275800  |
| H  | 0.75805500  | 2.12568000  | 0.56910600  |
| H  | -3.33486200 | 3.37869700  | 0.14019100  |
| H  | -0.98712600 | 2.91971200  | -0.99419800 |
| H  | -1.73395100 | 1.67583900  | -0.00745700 |
| N  | -0.25222800 | 0.61051500  | 2.31718000  |
| H  | 1.55780300  | 0.08159100  | 1.71913400  |
| H  | -0.52851200 | 0.20694400  | 3.21122900  |
| O  | -2.06237300 | 5.00834500  | 0.07671500  |
| H  | -2.06652100 | 5.02533000  | -0.88692300 |
| C  | 3.00761800  | -2.12709700 | 0.21655100  |
| C  | 2.97753600  | -1.48225600 | 1.62174800  |
| C  | 2.55916900  | -3.58687100 | 0.25210900  |
| C  | 2.03973200  | -2.24871400 | 2.56850300  |
| C  | 1.10185300  | -3.69072800 | 0.70329800  |
| C  | 0.77835100  | -2.67324700 | 1.81743800  |
| H  | 2.33661800  | -1.57487500 | -0.44837200 |
| H  | 2.55168900  | -3.13640400 | 2.95686200  |
| H  | 3.17132700  | -4.16893800 | 0.95221800  |
| H  | 4.00894200  | -2.03583100 | -0.21530500 |
| H  | 3.98989500  | -1.48397400 | 2.03780700  |
| H  | 2.67330200  | -4.05228000 | -0.73059700 |
| H  | 1.79685100  | -1.61882300 | 3.43218700  |
| H  | 0.44425700  | -3.48922700 | -0.15677400 |
| H  | 0.04595400  | -3.11565900 | 2.50374100  |
| H  | 0.29759500  | -1.79192800 | 1.37736100  |
| N  | 2.56565900  | -0.05294700 | 1.50979200  |
| H  | 3.08033200  | 0.51888200  | 2.17948200  |
| H  | 2.85227000  | 0.44414600  | 0.36411900  |
| O  | 0.92166300  | -5.03466700 | 1.13846700  |
| H  | -0.00911100 | -5.17807800 | 1.34227100  |

**INT4'b**

|    |             |             |             |
|----|-------------|-------------|-------------|
| C  | -4.37804000 | -1.04906700 | -2.39008900 |
| C  | -5.29583900 | -0.64911100 | -1.22041400 |
| C  | -2.91564900 | -0.72094500 | -2.08525800 |
| C  | -4.54834900 | -0.76095100 | 0.12188400  |
| C  | -2.41495600 | -1.57937400 | -0.91279000 |
| C  | -3.54497400 | -1.90946800 | 0.07004500  |
| H  | -4.48332400 | -2.12975400 | -2.55457900 |
| H  | -4.01829900 | 0.17658700  | 0.33481500  |
| H  | -2.82421300 | 0.33561500  | -1.79884900 |
| H  | -4.70019300 | -0.55393000 | -3.31196900 |
| H  | -5.59508900 | 0.40297200  | -1.36168100 |
| H  | -2.28567900 | -0.86597400 | -2.96648700 |
| H  | -5.27295100 | -0.90799700 | 0.93005900  |
| H  | -1.94884200 | -2.50257800 | -1.28626500 |
| H  | -3.10186900 | -2.11345500 | 1.05031400  |
| H  | -4.06054400 | -2.82065600 | -0.25423200 |
| N  | -6.44598800 | -1.55619000 | -1.20001500 |
| H  | -7.14973000 | -1.23558400 | -0.54094800 |
| H  | -6.88866900 | -1.60101100 | -2.11397000 |
| O  | -1.45275500 | -0.88170800 | -0.11071400 |
| H  | -0.98780500 | 0.11542900  | 1.66636500  |
| C  | 5.46493000  | 2.01893600  | -1.94470700 |
| C  | 4.35289600  | 1.52851200  | -2.87502400 |
| N  | 3.72713300  | 1.07368500  | -0.64982300 |
| H  | 5.61284600  | 3.10114800  | -1.97577400 |
| H  | 4.66896100  | 0.73125200  | -3.55247800 |
| C  | 3.28944400  | 0.96313000  | -1.94097700 |
| O  | 2.22419800  | 0.48746300  | -2.29853400 |
| C  | 4.98895900  | 1.64034600  | -0.54524400 |
| O  | 5.59022200  | 1.80037000  | 0.49157400  |
| Br | 0.04717700  | -0.33420000 | -1.04002900 |
| H  | 6.43437800  | 1.54938200  | -2.12417100 |
| H  | 3.90092200  | 2.31502900  | -3.48348600 |
| C  | -2.21853500 | 2.29147000  | 2.71078200  |
| C  | -0.72699200 | 2.01017500  | 2.40470600  |
| C  | -2.67861500 | 3.61318700  | 2.09387700  |
| C  | -0.32538200 | 2.65520000  | 1.06510900  |
| C  | -2.61796400 | 3.54765500  | 0.56198200  |
| C  | -1.50401200 | 2.59714200  | 0.09424900  |
| H  | -2.82018800 | 1.46989400  | 2.29467900  |
| H  | -0.05127700 | 3.70525400  | 1.21980600  |
| H  | -2.01490800 | 4.42547200  | 2.41458600  |
| H  | -2.39101600 | 2.28169800  | 3.79246000  |
| H  | -0.11274100 | 2.45136800  | 3.19952400  |
| H  | -3.68712600 | 3.88225700  | 2.42057200  |

|   |             |             |             |
|---|-------------|-------------|-------------|
| H | 0.55940800  | 2.14452300  | 0.67182900  |
| H | -3.58438800 | 3.18932900  | 0.17187300  |
| H | -1.19962500 | 2.84932900  | -0.92909700 |
| H | -1.89628000 | 1.57175900  | 0.05316200  |
| N | -0.40772500 | 0.57486300  | 2.37056900  |
| H | 1.58786600  | 0.06348000  | 1.64990500  |
| H | -0.65093300 | 0.14604300  | 3.26171600  |
| O | -2.39650200 | 4.88231400  | 0.11863400  |
| H | -2.39094600 | 4.89589400  | -0.84500600 |
| C | 3.05662400  | -2.04710600 | 0.26982300  |
| C | 3.01576800  | -1.44746400 | 1.69591700  |
| C | 2.59646100  | -3.50358900 | 0.23603500  |
| C | 2.09085700  | -2.27030100 | 2.61298600  |
| C | 1.14111300  | -3.62595100 | 0.68838100  |
| C | 0.82548700  | -2.66587300 | 1.85331400  |
| H | 2.40117100  | -1.45762500 | -0.37892300 |
| H | 2.60819000  | -3.17342300 | 2.95872600  |
| H | 3.20781900  | -4.11973700 | 0.90697000  |
| H | 4.06517000  | -1.95188600 | -0.14629000 |
| H | 4.02870900  | -1.46143500 | 2.11369100  |
| H | 2.70487300  | -3.92599500 | -0.76706200 |
| H | 1.84786200  | -1.67888700 | 3.50345500  |
| H | 0.47780800  | -3.38394000 | -0.15710600 |
| H | 0.09749800  | -3.14252200 | 2.52180300  |
| H | 0.34048900  | -1.76400200 | 1.46277700  |
| N | 2.61094200  | -0.02618600 | 1.61696800  |
| H | 2.94694400  | 0.47154700  | 2.43900300  |
| H | 3.22264700  | 0.68507500  | 0.21541400  |
| O | 0.96056100  | -4.99117000 | 1.05613600  |
| H | 0.03616500  | -5.13358500 | 1.28770600  |

## M2'

|   |             |             |             |
|---|-------------|-------------|-------------|
| C | -1.24700400 | -0.96685000 | 0.88730800  |
| C | -2.04615100 | -0.55968300 | -0.37301800 |
| C | -0.42446900 | 0.19075000  | 1.48433900  |
| C | -2.42155700 | 0.91832800  | -0.28292200 |
| C | 0.03634200  | 1.15160200  | 0.39766700  |
| C | -1.16860600 | 1.81023900  | -0.29196700 |
| H | -1.95330900 | -1.32866900 | 1.64540600  |
| H | -3.08161800 | 1.17634100  | -1.11517600 |
| H | 0.42659700  | -0.18741700 | 2.05829900  |
| H | -0.58880000 | -1.80855000 | 0.64360500  |
| H | -1.40050500 | -0.68402800 | -1.25031200 |
| H | -1.03684800 | 0.77556000  | 2.18195000  |
| H | -2.99492300 | 1.07875600  | 0.64241400  |
| H | 0.71614800  | 1.91114900  | 0.80378500  |
| H | -0.87503600 | 2.04563400  | -1.32057800 |



|    |             |             |             |
|----|-------------|-------------|-------------|
| H  | -1.37326700 | 2.76317400  | 0.20703400  |
| N  | -3.24130900 | -1.36437400 | -0.61570800 |
| H  | -2.99549200 | -2.34166900 | -0.74573300 |
| H  | -3.86863500 | -1.31805600 | 0.18427900  |
| O  | 0.71597500  | 0.46745500  | -0.67179700 |
| Br | 2.27473500  | -0.32964500 | -0.14797400 |

**TS5**

|   |             |             |             |
|---|-------------|-------------|-------------|
| C | 0.12449300  | 2.93328100  | -1.57648500 |
| C | 1.36854300  | 2.49401600  | -1.86581600 |
| C | 0.74129900  | 1.55840200  | 0.07380600  |
| N | -0.26789800 | 2.35599900  | -0.38574400 |
| H | -0.52627300 | 3.58994400  | -2.12974800 |
| H | 2.01049300  | 2.71020900  | -2.70375000 |
| N | 1.76428300  | 1.65846700  | -0.83151600 |
| C | -1.56134700 | 2.69262400  | 0.27088700  |
| C | -2.69727200 | 2.66952600  | -0.74264200 |
| C | -1.42119500 | 4.04250400  | 0.96795200  |
| H | -1.74323000 | 1.90825100  | 0.99741600  |
| H | -2.73969600 | 1.70299800  | -1.24855800 |
| H | -3.63973100 | 2.78545400  | -0.20218000 |
| H | -2.62399700 | 3.48044500  | -1.47662300 |
| H | -0.61951200 | 4.01165300  | 1.71097300  |
| H | -1.20679400 | 4.84281400  | 0.25002400  |
| H | -2.35647700 | 4.28427400  | 1.47992700  |
| C | 3.20128600  | 1.46100800  | -0.53616800 |
| C | 3.83464100  | 2.80210000  | -0.16716200 |
| C | 3.89975000  | 0.79246600  | -1.71541900 |
| H | 3.25126500  | 0.80820400  | 0.33259100  |
| H | 3.29268500  | 3.27166700  | 0.65887800  |
| H | 4.87092300  | 2.64412300  | 0.14438900  |
| H | 3.83422500  | 3.49018500  | -1.01835800 |
| H | 3.39182300  | -0.12851400 | -2.01376100 |
| H | 3.94220800  | 1.45940500  | -2.58276700 |
| H | 4.92816100  | 0.54866400  | -1.43706100 |
| C | 0.62563000  | 0.69728300  | 1.22118800  |
| O | -0.04515600 | 1.29457200  | 2.29716000  |
| C | 1.46054600  | -0.45391500 | 1.55250900  |
| C | 1.43928100  | -0.94721100 | 2.87782300  |
| C | 2.17741600  | -1.21758900 | 0.60229300  |
| C | 2.10062300  | -2.11953600 | 3.22593300  |
| H | 0.86231400  | -0.42495800 | 3.63259700  |
| C | 2.83802700  | -2.38620700 | 0.96128300  |
| H | 2.19147800  | -0.93073700 | -0.44249800 |
| C | 2.81165200  | -2.85159900 | 2.27557500  |
| H | 2.05263300  | -2.46652200 | 4.25392700  |
| H | 3.37591400  | -2.93866900 | 0.19489600  |

|    |             |             |             |
|----|-------------|-------------|-------------|
| H  | 3.32889600  | -3.76441400 | 2.55148700  |
| H  | 0.60300400  | 1.71010800  | 2.88166900  |
| C  | -1.47083100 | -0.87653000 | -1.84828100 |
| C  | -0.81668900 | -1.16909600 | -0.49967400 |
| C  | -0.73305200 | -1.65172600 | -2.95563100 |
| C  | -0.99080100 | -2.64079400 | -0.09856500 |
| C  | -0.18915100 | -3.00902300 | -2.48251200 |
| C  | -1.02697500 | -3.56330400 | -1.33195700 |
| H  | -2.52943200 | -1.15239700 | -1.80467700 |
| H  | -0.16394100 | -2.91835500 | 0.56851400  |
| H  | 0.12414100  | -1.07583700 | -3.32434300 |
| H  | -1.42613600 | 0.19919100  | -2.05091200 |
| H  | 0.25430500  | -1.01917600 | -0.67106100 |
| H  | -1.40462800 | -1.80909300 | -3.80588900 |
| H  | -1.92397900 | -2.74676100 | 0.46231900  |
| H  | -0.19462300 | -3.71698900 | -3.32311700 |
| H  | -0.69342100 | -4.57530200 | -1.06965400 |
| H  | -2.05779000 | -3.66440500 | -1.69388400 |
| N  | -1.17988000 | -0.19828900 | 0.54651800  |
| H  | -1.14368200 | -0.66784900 | 1.45657400  |
| O  | 1.16936100  | -2.80030300 | -2.07271800 |
| H  | 1.47058800  | -3.58529400 | -1.59961700 |
| Br | -3.49417500 | -0.45913700 | 0.76195100  |

### INT5-1

|   |             |             |             |
|---|-------------|-------------|-------------|
| C | 1.60025000  | -2.71610000 | 1.62136300  |
| C | 2.84781100  | -2.27173900 | 1.33797700  |
| C | 1.39725500  | -1.10651100 | 0.10610600  |
| N | 0.71821400  | -1.99581300 | 0.84813900  |
| H | 1.26095000  | -3.48669300 | 2.29382400  |
| H | 3.80765300  | -2.57748200 | 1.72104600  |
| N | 2.71422200  | -1.28020000 | 0.39099400  |
| C | -0.70651800 | -2.42683000 | 0.70708300  |
| C | -1.33915100 | -2.70377800 | 2.05982000  |
| C | -0.74214500 | -3.63249200 | -0.22373400 |
| H | -1.24805800 | -1.61234000 | 0.24245900  |
| H | -1.16994700 | -1.88419800 | 2.76437400  |
| H | -2.41548100 | -2.78845900 | 1.88159300  |
| H | -0.99125200 | -3.64293000 | 2.50490600  |
| H | -0.40375700 | -3.35436100 | -1.22653300 |
| H | -0.12237000 | -4.45025400 | 0.16487100  |
| H | -1.77969700 | -3.95815000 | -0.31552900 |
| C | 3.89778100  | -0.68273400 | -0.27580400 |
| C | 4.58045800  | -1.74777200 | -1.13351900 |
| C | 4.84120600  | -0.07084300 | 0.75357700  |
| H | 3.52597700  | 0.12111300  | -0.91064600 |
| H | 3.88552500  | -2.20529000 | -1.84465800 |

|    |             |             |             |
|----|-------------|-------------|-------------|
| H  | 5.40037600  | -1.29203700 | -1.69412600 |
| H  | 4.99692800  | -2.54605300 | -0.51159000 |
| H  | 4.31664600  | 0.65740600  | 1.37529900  |
| H  | 5.28908700  | -0.83610800 | 1.39512000  |
| H  | 5.65240100  | 0.44248400  | 0.23173300  |
| C  | 0.85920200  | -0.01101800 | -0.89994900 |
| O  | 1.20115200  | -0.50254400 | -2.19604200 |
| C  | 1.57548900  | 1.30831800  | -0.57342800 |
| C  | 1.87769100  | 2.16973500  | -1.62731400 |
| C  | 1.83357200  | 1.70463200  | 0.73965500  |
| C  | 2.46425800  | 3.40753300  | -1.36856700 |
| H  | 1.63400800  | 1.86433400  | -2.64024900 |
| C  | 2.40703900  | 2.94776300  | 0.99840600  |
| H  | 1.56314700  | 1.05483000  | 1.57059700  |
| C  | 2.73327800  | 3.79774200  | -0.05722200 |
| H  | 2.69851700  | 4.07392600  | -2.19282400 |
| H  | 2.58787600  | 3.25571600  | 2.02363400  |
| H  | 3.17987800  | 4.76666100  | 0.14193500  |
| H  | 2.10655200  | -0.83774700 | -2.21450700 |
| C  | -1.67623900 | 0.71993000  | 1.23338100  |
| C  | -1.25209700 | 1.21454200  | -0.15643100 |
| C  | -2.28170300 | 1.86551700  | 2.05807500  |
| C  | -2.46113900 | 1.72463400  | -0.96946500 |
| C  | -3.14069900 | 2.81223200  | 1.20549000  |
| C  | -3.63263300 | 2.11074700  | -0.05819700 |
| H  | -2.40523800 | -0.08935400 | 1.11187100  |
| H  | -2.13235500 | 2.58167300  | -1.56713300 |
| H  | -1.49518000 | 2.47337600  | 2.52065900  |
| H  | -0.80429300 | 0.30457700  | 1.76095300  |
| H  | -0.59240500 | 2.07234400  | -0.00019600 |
| H  | -2.88981700 | 1.44736600  | 2.86701900  |
| H  | -2.79845800 | 0.94212000  | -1.65247100 |
| H  | -3.99346500 | 3.16831100  | 1.80052200  |
| H  | -4.33961700 | 2.75161000  | -0.60034700 |
| H  | -4.18223400 | 1.20365300  | 0.22332900  |
| N  | -0.52427200 | 0.23009100  | -0.95791800 |
| H  | -1.10859000 | -0.50690300 | -1.35790900 |
| O  | -2.30903400 | 3.93171300  | 0.87613200  |
| H  | -2.77848400 | 4.48477900  | 0.24096300  |
| Br | -3.42419200 | -1.66259600 | -0.98231500 |

## INT5

|   |            |             |            |
|---|------------|-------------|------------|
| C | 1.67634400 | -2.40808800 | 1.66017900 |
| C | 2.49294100 | -1.37548000 | 1.96656700 |
| C | 0.89687400 | -0.59357400 | 0.64829100 |
| N | 0.67750900 | -1.90893900 | 0.85826700 |
| H | 1.73501400 | -3.45088500 | 1.92430500 |

|   |             |             |             |
|---|-------------|-------------|-------------|
| H | 3.39795000  | -1.35158600 | 2.54872200  |
| N | 1.99614900  | -0.25211900 | 1.34521200  |
| C | -0.32949000 | -2.80218300 | 0.22477200  |
| C | -1.17238700 | -3.47069700 | 1.30652500  |
| C | 0.38231500  | -3.79809300 | -0.68580100 |
| H | -0.95186100 | -2.16157500 | -0.39579000 |
| H | -1.63806400 | -2.73660600 | 1.97257400  |
| H | -1.96460800 | -4.05586800 | 0.83201300  |
| H | -0.57360500 | -4.15298300 | 1.91837700  |
| H | 1.03973000  | -3.27132400 | -1.38303100 |
| H | 0.98366200  | -4.50603700 | -0.10535500 |
| H | -0.36633600 | -4.36752100 | -1.24348500 |
| C | 2.77255800  | 1.01988800  | 1.35437300  |
| C | 4.25377400  | 0.73318700  | 1.11937000  |
| C | 2.51482800  | 1.75906800  | 2.66178500  |
| H | 2.41657000  | 1.59557300  | 0.50602000  |
| H | 4.37657700  | 0.08654800  | 0.24686100  |
| H | 4.75454700  | 1.68533200  | 0.92455800  |
| H | 4.73442900  | 0.28442300  | 1.99480200  |
| H | 1.44911100  | 1.94616700  | 2.81058800  |
| H | 2.89197500  | 1.18033400  | 3.51247400  |
| H | 3.03607600  | 2.72002700  | 2.64324200  |
| C | -0.09241600 | 0.25043900  | -0.19020000 |
| O | -0.24533700 | -0.38755300 | -1.43564900 |
| H | 0.65669100  | -0.62684200 | -1.78076000 |
| C | 0.34523100  | 1.70762000  | -0.39056800 |
| C | 0.03885900  | 2.67500000  | 0.57022700  |
| C | 1.05537600  | 2.07703900  | -1.53532200 |
| C | 0.47293600  | 3.98936300  | 0.41184200  |
| H | -0.53874600 | 2.38507700  | 1.44247300  |
| C | 1.48504900  | 3.39354800  | -1.69304000 |
| H | 1.30183600  | 1.33647000  | -2.28755700 |
| C | 1.20709900  | 4.34996800  | -0.71767500 |
| H | 0.23544600  | 4.73117200  | 1.16874800  |
| H | 2.04716500  | 3.66732600  | -2.58020400 |
| H | 1.54950700  | 5.37270400  | -0.84268400 |
| C | -3.47479000 | 1.34006000  | 0.95004100  |
| C | -2.52597500 | 0.76392200  | -0.12011900 |
| C | -4.92470800 | 1.33474100  | 0.46875500  |
| C | -3.25933200 | -0.29095900 | -0.98272200 |
| C | -5.43084400 | -0.10022600 | 0.27918800  |
| C | -4.28510100 | -1.04156900 | -0.13625300 |
| H | -3.38962100 | 0.72938400  | 1.86036100  |
| H | -3.78636300 | 0.21018500  | -1.80333700 |
| H | -4.99982700 | 1.84055400  | -0.50147200 |
| H | -3.14840300 | 2.34710600  | 1.22758400  |
| H | -2.18737100 | 1.57302100  | -0.77550500 |

|    |             |             |             |
|----|-------------|-------------|-------------|
| H  | -5.57985200 | 1.87492500  | 1.15777300  |
| H  | -2.52688300 | -0.95512800 | -1.44497200 |
| H  | -5.87228700 | -0.46127600 | 1.22080200  |
| H  | -4.70123600 | -1.89966000 | -0.67759500 |
| H  | -3.80630200 | -1.45232100 | 0.76544900  |
| N  | -1.32942000 | 0.25200700  | 0.56893200  |
| H  | -1.52669700 | -0.65554700 | 0.97975800  |
| O  | -6.43933800 | -0.03311000 | -0.72172900 |
| H  | -6.85710300 | -0.89704200 | -0.81052100 |
| Br | 2.77948000  | -1.11180900 | -1.71983900 |

**TS6**

|   |             |             |             |
|---|-------------|-------------|-------------|
| C | 1.44844500  | -2.55373200 | -2.29024800 |
| C | 2.14723400  | -2.98521600 | -1.22109000 |
| C | 0.67129700  | -1.48936100 | -0.49682600 |
| N | 0.52435700  | -1.64864700 | -1.82797400 |
| H | 1.54375000  | -2.79131900 | -3.33617800 |
| H | 2.97191700  | -3.67383300 | -1.15362100 |
| N | 1.63779700  | -2.34719400 | -0.11086000 |
| C | -0.37590800 | -0.92512000 | -2.75582700 |
| C | -1.43627600 | -1.88240500 | -3.29475000 |
| C | 0.45071900  | -0.29788200 | -3.87756800 |
| H | -0.82653900 | -0.13718400 | -2.15294300 |
| H | -2.01566900 | -2.35695400 | -2.49682400 |
| H | -2.12931000 | -1.33251600 | -3.93725300 |
| H | -0.97843500 | -2.67630200 | -3.89424800 |
| H | 1.32611300  | 0.20472400  | -3.45388800 |
| H | 0.78027500  | -1.05489200 | -4.59737900 |
| H | -0.16704900 | 0.42377300  | -4.41902500 |
| C | 2.26519600  | -2.59533900 | 1.21299100  |
| C | 3.69464300  | -2.06034000 | 1.19656300  |
| C | 2.17280000  | -4.07947400 | 1.55229200  |
| H | 1.68468000  | -2.05074600 | 1.94660800  |
| H | 3.72377800  | -1.06361500 | 0.74492800  |
| H | 4.07732600  | -2.02307200 | 2.21988800  |
| H | 4.34992900  | -2.71456200 | 0.61108800  |
| H | 1.13376400  | -4.41827400 | 1.54436100  |
| H | 2.74994800  | -4.69730900 | 0.85791100  |
| H | 2.58214900  | -4.23733100 | 2.55324200  |
| C | -0.25544400 | -0.52147700 | 0.32229000  |
| O | -0.33151200 | 0.68396400  | -0.29973000 |
| H | 0.30027100  | 1.79406700  | -0.03920200 |
| C | 0.27010700  | -0.34939400 | 1.75677800  |
| C | -0.34061400 | -0.92549600 | 2.87056600  |
| C | 1.43538800  | 0.40280100  | 1.92652100  |
| C | 0.20291000  | -0.73952800 | 4.14192900  |
| H | -1.21752100 | -1.54873800 | 2.73175200  |

|    |             |             |             |
|----|-------------|-------------|-------------|
| C  | 1.98815100  | 0.56883000  | 3.19216800  |
| H  | 1.94112100  | 0.77213500  | 1.03433800  |
| C  | 1.36849000  | 0.00367900  | 4.30666600  |
| H  | -0.28058900 | -1.18943100 | 5.00383500  |
| H  | 2.91271300  | 1.12939800  | 3.30249600  |
| H  | 1.79647300  | 0.13359300  | 5.29593200  |
| C  | -3.77318800 | -1.46988300 | 1.30223700  |
| C  | -2.71467500 | -0.48640400 | 0.76537300  |
| C  | -5.17087800 | -0.85549900 | 1.25797300  |
| C  | -3.32403000 | 0.39742900  | -0.35279900 |
| C  | -5.62132400 | -0.60616800 | -0.18827000 |
| C  | -4.41115700 | -0.36401700 | -1.10628500 |
| H  | -3.75219500 | -2.38137100 | 0.68932500  |
| H  | -3.78579100 | 1.28889600  | 0.09134600  |
| H  | -5.16393500 | 0.11678600  | 1.76511200  |
| H  | -3.50924400 | -1.78278600 | 2.31704800  |
| H  | -2.40241500 | 0.16881700  | 1.58506600  |
| H  | -5.90308000 | -1.47784400 | 1.77902700  |
| H  | -2.51968400 | 0.74120200  | -1.00438900 |
| H  | -6.18293100 | -1.47997100 | -0.55455000 |
| H  | -4.73932100 | 0.17923200  | -2.00069600 |
| H  | -4.02150700 | -1.32868600 | -1.45974000 |
| N  | -1.53426200 | -1.26457500 | 0.36828700  |
| H  | -1.72020300 | -1.68373100 | -0.53928500 |
| O  | -6.47088800 | 0.53101800  | -0.14430300 |
| H  | -6.83351200 | 0.66671000  | -1.02678600 |
| Br | 2.97290100  | 0.58785400  | -1.33556700 |
| N  | 0.44222700  | 2.99442900  | 0.00428400  |
| C  | 0.99181400  | 3.45617400  | -1.30252000 |
| C  | 0.22538800  | 2.89146000  | -2.48521300 |
| H  | 2.01192600  | 3.07605000  | -1.36162700 |
| H  | 0.99719500  | 4.55587600  | -1.29815900 |
| H  | 0.79366300  | 3.08616600  | -3.39792800 |
| H  | 0.15328500  | 1.81098800  | -2.35213800 |
| H  | -0.77202400 | 3.32262200  | -2.60466400 |
| C  | -0.97787900 | 3.41878900  | 0.15998700  |
| C  | -1.55461000 | 3.05749100  | 1.52136800  |
| H  | -1.54350800 | 2.89759500  | -0.61312500 |
| H  | -1.03719300 | 4.49984200  | -0.02753300 |
| H  | -1.30727500 | 2.01937600  | 1.76054500  |
| H  | -1.18362300 | 3.70308100  | 2.32016400  |
| H  | -2.64288000 | 3.15373900  | 1.48981300  |
| C  | 1.25075600  | 3.52648700  | 1.14129100  |
| C  | 2.76194600  | 3.46555900  | 0.95413700  |
| H  | 0.96187300  | 2.95600100  | 2.02567200  |
| H  | 0.93854500  | 4.56897600  | 1.30059600  |
| H  | 3.23308700  | 3.63078200  | 1.92718000  |

|   |            |            |            |
|---|------------|------------|------------|
| H | 3.09678900 | 2.50664400 | 0.54679100 |
| H | 3.11590500 | 4.24879700 | 0.27966700 |

**INT6**

|   |             |             |             |
|---|-------------|-------------|-------------|
| C | 1.93565900  | 3.09440000  | -0.46453400 |
| C | 2.88568900  | 2.23819500  | -0.89564700 |
| C | 1.26641000  | 1.02960700  | 0.04846400  |
| N | 0.94304300  | 2.33704900  | 0.11601200  |
| H | 1.88790400  | 4.16821100  | -0.51612100 |
| H | 3.81910700  | 2.43071100  | -1.39182400 |
| N | 2.46514500  | 0.96141100  | -0.57279100 |
| C | -0.29743500 | 2.94830000  | 0.66093500  |
| C | -1.05900500 | 3.64087900  | -0.46441500 |
| C | 0.05644600  | 3.89513600  | 1.80027300  |
| H | -0.86442600 | 2.11645700  | 1.06825800  |
| H | -1.25961800 | 2.95591900  | -1.29161000 |
| H | -2.01350000 | 4.00276500  | -0.07797700 |
| H | -0.50663500 | 4.49868900  | -0.85612600 |
| H | 0.60584800  | 3.36551200  | 2.57945500  |
| H | 0.65662800  | 4.73948300  | 1.45224500  |
| H | -0.86401200 | 4.29297900  | 2.23116100  |
| C | 3.18744900  | -0.24408200 | -1.06629800 |
| C | 4.68475300  | 0.02023700  | -1.15943900 |
| C | 2.58802500  | -0.66159700 | -2.40350000 |
| H | 3.03129800  | -1.02214400 | -0.32779200 |
| H | 5.07632400  | 0.43485500  | -0.22886200 |
| H | 5.18204200  | -0.93267200 | -1.34505600 |
| H | 4.93669300  | 0.68732700  | -1.98607100 |
| H | 1.51299900  | -0.82304000 | -2.30880400 |
| H | 2.76592100  | 0.11189900  | -3.15561500 |
| H | 3.05465600  | -1.58958700 | -2.74013700 |
| C | 0.31228200  | -0.06658100 | 0.68604800  |
| O | -0.06648300 | 0.34514300  | 1.88708100  |
| C | 1.04880300  | -1.42858600 | 0.77210200  |
| C | 0.89944200  | -2.45087100 | -0.16461100 |
| C | 1.89814400  | -1.63719700 | 1.86067300  |
| C | 1.61156100  | -3.64244800 | -0.03723300 |
| H | 0.23478600  | -2.30231300 | -1.00630100 |
| C | 2.62695000  | -2.81575900 | 1.98123500  |
| H | 1.98464500  | -0.85355100 | 2.60396700  |
| C | 2.48970200  | -3.82342300 | 1.02657600  |
| H | 1.48391100  | -4.42660100 | -0.77530900 |
| H | 3.30046100  | -2.95257900 | 2.81986300  |
| H | 3.05380000  | -4.74439400 | 1.11886900  |
| C | -2.60483000 | -1.52120600 | -1.23826800 |
| C | -1.93728700 | -0.94911700 | 0.02894200  |
| C | -4.09021500 | -1.79464200 | -1.00812200 |

|   |             |             |             |
|---|-------------|-------------|-------------|
| C | -2.96331600 | -0.12633200 | 0.84595300  |
| C | -4.84638800 | -0.48143900 | -0.79024000 |
| C | -3.95985600 | 0.55919400  | -0.08650900 |
| H | -2.49243400 | -0.79485300 | -2.05197400 |
| H | -3.51570200 | -0.79202800 | 1.51827600  |
| H | -4.21599800 | -2.40952600 | -0.11042900 |
| H | -2.08166800 | -2.42566200 | -1.55718400 |
| H | -1.59374700 | -1.77958500 | 0.65194300  |
| H | -4.53128800 | -2.34751200 | -1.83997000 |
| H | -2.42230700 | 0.58072400  | 1.47300100  |
| H | -5.17369500 | -0.08240300 | -1.75794500 |
| H | -4.59591000 | 1.26699900  | 0.45315700  |
| H | -3.42417200 | 1.14455900  | -0.84346900 |
| N | -0.74019900 | -0.19780900 | -0.37658500 |
| H | -1.03484800 | 0.72711300  | -0.67847700 |
| O | -6.00118000 | -0.80058000 | -0.00883800 |
| H | -6.52959000 | -0.00283900 | 0.09014100  |

**TS7**

|   |             |             |             |
|---|-------------|-------------|-------------|
| C | 3.87659800  | -1.29138400 | -0.51652000 |
| C | 3.24680700  | -2.33589700 | 0.06863300  |
| C | 1.68985800  | -0.74893100 | -0.33879100 |
| N | 2.90621300  | -0.33505100 | -0.76173300 |
| H | 4.91403600  | -1.15509100 | -0.77016500 |
| H | 3.63083200  | -3.28341600 | 0.40691100  |
| N | 1.91210800  | -1.98016900 | 0.17612400  |
| C | 3.18750000  | 1.01721700  | -1.27745100 |
| C | 4.07697800  | 0.94656200  | -2.51311500 |
| C | 3.79478600  | 1.87413200  | -0.17060900 |
| H | 2.21500300  | 1.41496400  | -1.56296700 |
| H | 3.64072400  | 0.29282800  | -3.27061800 |
| H | 4.18289400  | 1.94656200  | -2.93711000 |
| H | 5.07818700  | 0.58266600  | -2.26935700 |
| H | 3.13540900  | 1.89972800  | 0.70066700  |
| H | 4.76983500  | 1.48130700  | 0.13208900  |
| H | 3.93338500  | 2.89628900  | -0.52979300 |
| C | 0.87716300  | -2.84326900 | 0.77380400  |
| C | 1.33013000  | -3.34879400 | 2.13888300  |
| C | 0.52781900  | -3.97934600 | -0.18090600 |
| H | 0.01104700  | -2.19223900 | 0.88580900  |
| H | 1.62153200  | -2.51835100 | 2.78517400  |
| H | 0.50825100  | -3.88634200 | 2.61501400  |
| H | 2.17393000  | -4.03821400 | 2.05435700  |
| H | 0.17880500  | -3.58331400 | -1.13678900 |
| H | 1.39758800  | -4.61662700 | -0.36393100 |
| H | -0.26287900 | -4.59669600 | 0.25022300  |
| C | -0.02968700 | 0.41404600  | -0.69184300 |



|   |             |             |             |
|---|-------------|-------------|-------------|
| O | 0.06843400  | 0.75309300  | -1.89027300 |
| C | 0.27979800  | 1.43435300  | 0.39625800  |
| C | 0.46074600  | 1.06457900  | 1.73096700  |
| C | 0.39711100  | 2.77249000  | 0.03884500  |
| C | 0.76577100  | 2.02001800  | 2.69026700  |
| H | 0.38147000  | 0.01637700  | 2.00493500  |
| C | 0.70613600  | 3.73610600  | 0.99948700  |
| H | 0.25981600  | 3.04669800  | -1.00096300 |
| C | 0.89335600  | 3.36221400  | 2.32468800  |
| H | 0.91231800  | 1.72336500  | 3.72248400  |
| H | 0.80402800  | 4.77591900  | 0.70912900  |
| H | 1.13825400  | 4.10742400  | 3.07264900  |
| C | -3.18183700 | -1.24491000 | 0.56942000  |
| C | -2.27711100 | -0.03157100 | 0.28464100  |
| C | -4.65041000 | -0.82864900 | 0.62302500  |
| C | -3.02012100 | 1.01560500  | -0.57817300 |
| C | -5.12456400 | -0.35543400 | -0.75404200 |
| C | -3.98615900 | 0.32159400  | -1.53497400 |
| H | -3.05155000 | -1.98868100 | -0.22652500 |
| H | -3.58606900 | 1.68856000  | 0.07465700  |
| H | -4.77168400 | 0.00163900  | 1.32676000  |
| H | -2.87081400 | -1.72734500 | 1.49825700  |
| H | -2.01811700 | 0.43424800  | 1.23789300  |
| H | -5.28288500 | -1.64465500 | 0.97744500  |
| H | -2.29589200 | 1.62884700  | -1.11761200 |
| H | -5.49259300 | -1.21406100 | -1.32845000 |
| H | -4.41209200 | 1.02188600  | -2.25897600 |
| H | -3.44741900 | -0.43434400 | -2.11763500 |
| N | -1.02962500 | -0.54212300 | -0.30851100 |
| H | -1.24288700 | -1.08389100 | -1.14285400 |
| O | -6.21003300 | 0.54511000  | -0.52051700 |
| H | -6.58454400 | 0.79534800  | -1.37051200 |

**PR1**

|   |            |             |             |
|---|------------|-------------|-------------|
| C | 1.22598100 | 1.74084900  | -0.20951500 |
| O | 1.86803000 | 2.78785800  | -0.17667500 |
| C | 1.93372600 | 0.42093400  | -0.10063800 |
| C | 2.92373900 | 0.27535500  | 0.87052700  |
| C | 1.68162300 | -0.61857600 | -0.99644000 |
| C | 3.63634100 | -0.91509300 | 0.96482000  |
| H | 3.12708200 | 1.09601900  | 1.54865900  |
| C | 2.41008300 | -1.80043500 | -0.91470600 |
| H | 0.92923700 | -0.49636700 | -1.76778000 |
| C | 3.38171800 | -1.95265600 | 0.07133100  |
| H | 4.39455000 | -1.03153900 | 1.73005600  |
| H | 2.22048300 | -2.60019900 | -1.62045100 |
| H | 3.94352800 | -2.87676500 | 0.13922100  |

|   |             |             |             |
|---|-------------|-------------|-------------|
| C | -1.93202400 | 0.35170000  | -1.32755600 |
| C | -1.07192200 | 0.66681100  | -0.09083200 |
| C | -3.29303700 | -0.26684100 | -0.95543100 |
| C | -1.96687000 | 1.04621200  | 1.09107900  |
| C | -3.19978300 | -1.06902800 | 0.33293700  |
| C | -2.84223500 | -0.14810900 | 1.51102500  |
| H | -2.09811100 | 1.28073800  | -1.88086200 |
| H | -1.35256300 | 1.38340100  | 1.92854000  |
| H | -3.65509700 | -0.90116200 | -1.76668600 |
| H | -1.37793400 | -0.31821000 | -1.98844700 |
| H | -0.50093900 | -0.21664200 | 0.18916200  |
| H | -4.03828600 | 0.51928500  | -0.80398100 |
| H | -2.59779000 | 1.89170400  | 0.79273800  |
| H | -4.15567300 | -1.56312500 | 0.53530600  |
| H | -2.32922500 | -0.74215800 | 2.27355400  |
| H | -3.76541600 | 0.21836100  | 1.96661500  |
| N | -0.11541300 | 1.73431700  | -0.38460900 |
| H | -0.50883900 | 2.66334000  | -0.49186400 |
| O | -2.19783300 | -2.06786200 | 0.11569900  |
| H | -2.11273800 | -2.59361400 | 0.91668700  |

## COM2

|   |             |             |             |
|---|-------------|-------------|-------------|
| C | 2.85748600  | -0.62986100 | 1.25843300  |
| C | 2.72545000  | -1.35791800 | -0.08464700 |
| C | 3.85623700  | 0.52000400  | 1.12557600  |
| C | 2.71535300  | -0.36536900 | -1.26809600 |
| C | 3.33767200  | 1.60671800  | 0.17071400  |
| C | 2.31211300  | 1.03848900  | -0.81868000 |
| H | 1.87323900  | -0.24664400 | 1.55879400  |
| H | 3.71653000  | -0.31449700 | -1.71055900 |
| H | 4.79598900  | 0.14054500  | 0.70396400  |
| H | 3.17677400  | -1.33313600 | 2.03551100  |
| H | 3.59874500  | -2.01925600 | -0.19587500 |
| H | 4.09862600  | 0.95311900  | 2.09945600  |
| H | 2.03723200  | -0.73462800 | -2.04617600 |
| H | 2.86336400  | 2.41176700  | 0.75083300  |
| H | 2.22706600  | 1.71190700  | -1.68007100 |
| H | 1.32465000  | 1.00804200  | -0.34728100 |
| N | 1.48572200  | -2.15414900 | -0.08602200 |
| H | 1.43441500  | -2.73710500 | -0.91860300 |
| H | 1.45500000  | -2.77380500 | 0.72143300  |
| O | 4.48612100  | 2.12115100  | -0.49794400 |
| H | 4.22270100  | 2.87186900  | -1.04199000 |
| C | -4.22001400 | 1.17679500  | 0.86379100  |
| C | -4.33918900 | 1.06869300  | -0.65990700 |
| N | -2.36543400 | -0.00381700 | 0.03225900  |
| H | -5.02992900 | 0.67926100  | 1.40216200  |

|    |             |             |             |
|----|-------------|-------------|-------------|
| H  | -4.35236800 | 2.03507000  | -1.16890700 |
| C  | -3.09711000 | 0.30967700  | -1.10899800 |
| O  | -2.78971100 | 0.02087100  | -2.23849900 |
| C  | -2.91491400 | 0.47553700  | 1.21684000  |
| O  | -2.43219600 | 0.34601300  | 2.31436000  |
| Br | -0.72609700 | -0.92064600 | -0.02332900 |
| H  | -4.16547900 | 2.20508300  | 1.22802600  |
| H  | -5.21741900 | 0.50989600  | -0.99136200 |

### INT3

|    |             |             |             |
|----|-------------|-------------|-------------|
| C  | 2.40664000  | -0.63318200 | 1.10559600  |
| C  | 2.55264300  | -0.62382300 | -0.41093100 |
| C  | 3.73238500  | -0.21343200 | 1.76542000  |
| C  | 2.80098400  | 0.80479700  | -0.92704900 |
| C  | 4.51200800  | 0.81923200  | 0.93852700  |
| C  | 3.56204600  | 1.66895700  | 0.09648000  |
| H  | 1.60579400  | 0.06049900  | 1.39054600  |
| H  | 3.35945200  | 0.75126800  | -1.86814700 |
| H  | 4.38784500  | -1.08043100 | 1.89643300  |
| H  | 2.10261400  | -1.63017800 | 1.43820300  |
| H  | 3.42661900  | -1.24130600 | -0.66185800 |
| H  | 3.53347400  | 0.19578400  | 2.76085800  |
| H  | 1.83803300  | 1.27802400  | -1.14815800 |
| H  | 5.09324400  | 1.46162300  | 1.61423600  |
| H  | 4.10933300  | 2.47207600  | -0.41119900 |
| H  | 2.85549700  | 2.15981500  | 0.77724600  |
| N  | 1.45319700  | -1.34539100 | -1.06922200 |
| H  | 1.59187000  | -1.29237000 | -2.07911300 |
| H  | -2.00373300 | -1.83582500 | 0.24615700  |
| O  | 5.41128200  | 0.08880900  | 0.10124300  |
| H  | 5.92933100  | 0.71218600  | -0.42090100 |
| C  | -4.92218500 | -0.58309000 | 0.95085900  |
| C  | -5.20754600 | 0.87663100  | 0.59897700  |
| N  | -2.94166900 | 0.30987100  | -0.05816400 |
| H  | -5.56208000 | -1.30562100 | 0.43711200  |
| H  | -5.45376000 | 1.49899200  | 1.46152300  |
| C  | -3.88563800 | 1.36612200  | -0.01373600 |
| O  | -3.67559400 | 2.48342600  | -0.40663700 |
| C  | -3.50343900 | -0.72337000 | 0.46418900  |
| O  | -2.91367000 | -1.89541700 | 0.59883800  |
| Br | -0.23677200 | -0.48913800 | -0.83372500 |
| H  | -4.96788900 | -0.80441400 | 2.02078700  |
| H  | -6.00284600 | 1.00074000  | -0.13918100 |

### TS4

|   |            |             |             |
|---|------------|-------------|-------------|
| C | 2.47473200 | -0.54959000 | 1.21803500  |
| C | 2.58862100 | -0.73739300 | -0.28965700 |

|    |             |             |             |
|----|-------------|-------------|-------------|
| C  | 3.74725500  | 0.12188400  | 1.76408600  |
| C  | 2.64758200  | 0.62058400  | -1.01215400 |
| C  | 4.36622600  | 1.12354100  | 0.77762800  |
| C  | 3.29799000  | 1.71194000  | -0.14194600 |
| H  | 1.59693100  | 0.07168600  | 1.43420900  |
| H  | 3.20246900  | 0.50134100  | -1.94941300 |
| H  | 4.51449400  | -0.62807300 | 1.98236000  |
| H  | 2.30769300  | -1.51978500 | 1.69491100  |
| H  | 3.52677200  | -1.27691500 | -0.48434900 |
| H  | 3.51765300  | 0.63337500  | 2.70418600  |
| H  | 1.62975700  | 0.92991000  | -1.27363700 |
| H  | 4.86449400  | 1.92636600  | 1.33842200  |
| H  | 3.72456900  | 2.50184500  | -0.77198900 |
| H  | 2.54007700  | 2.19547700  | 0.48680700  |
| N  | 1.57545700  | -1.67369500 | -0.79720800 |
| H  | 1.68467400  | -1.75106900 | -1.80913900 |
| H  | -2.87241900 | -1.29027900 | 0.54685000  |
| O  | 5.34491900  | 0.40787800  | 0.01982600  |
| H  | 5.75329500  | 1.01015000  | -0.61286100 |
| C  | -5.29667300 | 0.55713400  | 0.68921800  |
| C  | -4.60514500 | 1.74473700  | -0.01551300 |
| N  | -3.07035300 | -0.05306900 | 0.11398400  |
| H  | -6.16149800 | 0.16321500  | 0.14950600  |
| H  | -4.53411900 | 2.63489100  | 0.61352600  |
| C  | -3.17452100 | 1.26493300  | -0.34796100 |
| O  | -2.32376000 | 1.91062300  | -0.89966200 |
| C  | -4.19284400 | -0.45250600 | 0.68938000  |
| O  | -4.05099700 | -1.63485900 | 1.11459000  |
| Br | -0.20008200 | -0.99208500 | -0.62569100 |
| H  | -5.61225800 | 0.76921200  | 1.71361700  |
| H  | -5.09610500 | 2.03823400  | -0.94599200 |

#### INT4

|   |            |             |             |
|---|------------|-------------|-------------|
| C | 1.60591400 | -0.22862800 | -1.24006900 |
| C | 2.20477700 | 0.68686400  | -0.18099200 |
| C | 2.30124200 | -1.60145700 | -1.22840800 |
| C | 1.98456300 | 0.13097500  | 1.23665800  |
| C | 2.80291800 | -2.00735900 | 0.16296800  |
| C | 1.91908100 | -1.40773100 | 1.25399300  |
| H | 0.53768000 | -0.37553900 | -1.03679400 |
| H | 2.79317700 | 0.48691700  | 1.88492000  |
| H | 3.16757200 | -1.60286900 | -1.89780300 |
| H | 1.68302300 | 0.24862700  | -2.22113000 |
| H | 3.28694600 | 0.73945500  | -0.36862900 |
| H | 1.59859000 | -2.35868700 | -1.58740000 |
| H | 1.05076100 | 0.53859700  | 1.64160200  |
| H | 2.80145900 | -3.10281400 | 0.24006500  |

|    |             |             |             |
|----|-------------|-------------|-------------|
| H  | 2.21247100  | -1.78961300 | 2.23952000  |
| H  | 0.89466100  | -1.75324600 | 1.07053700  |
| N  | 1.79494200  | 2.08600000  | -0.37582400 |
| H  | 2.21299900  | 2.64679700  | 0.36854100  |
| O  | 4.14749800  | -1.53055100 | 0.27963000  |
| H  | 4.49944700  | -1.79551600 | 1.13720600  |
| C  | -4.29650500 | -1.04670400 | 0.08854300  |
| C  | -3.44395700 | -2.30000600 | -0.14738200 |
| N  | -2.02589800 | -0.44515200 | 0.07736700  |
| H  | -4.88378200 | -1.08446500 | 1.00888800  |
| H  | -3.63219800 | -2.78199100 | -1.10958800 |
| C  | -2.00129500 | -1.81056600 | -0.13406100 |
| O  | -1.00003900 | -2.47413900 | -0.28244400 |
| C  | -3.29781800 | 0.09812200  | 0.20452000  |
| O  | -3.53118700 | 1.26902400  | 0.37661700  |
| Br | -0.07068400 | 2.37282200  | -0.06786100 |
| H  | -4.98417700 | -0.82346900 | -0.73013100 |
| H  | -3.55809700 | -3.06097600 | 0.62785700  |
| H  | -1.19361300 | 0.13837500  | 0.11164700  |

**COM2'**

|   |             |             |             |
|---|-------------|-------------|-------------|
| C | -3.45675700 | 0.84304300  | 1.30230600  |
| C | -4.71499100 | 0.02629200  | 0.95556500  |
| C | -2.18985200 | 0.16152800  | 0.78662100  |
| C | -4.52330300 | -0.74413200 | -0.36506500 |
| C | -2.19096600 | 0.09755000  | -0.74664100 |
| C | -3.61886800 | 0.04755200  | -1.30474900 |
| H | -3.55482100 | 1.83465200  | 0.84096500  |
| H | -4.06921100 | -1.72210200 | -0.16675600 |
| H | -2.14024800 | -0.86960400 | 1.15931300  |
| H | -3.39475300 | 1.00083600  | 2.38419200  |
| H | -4.88052100 | -0.70864100 | 1.76043900  |
| H | -1.29193000 | 0.67081500  | 1.14542400  |
| H | -5.50200500 | -0.92961300 | -0.82084600 |
| H | -1.66327200 | 0.97093300  | -1.15749900 |
| H | -3.60215300 | -0.38563200 | -2.31242100 |
| H | -4.01290800 | 1.06550700  | -1.40585500 |
| N | -5.84241000 | 0.95131700  | 0.80897000  |
| H | -6.71891000 | 0.44427000  | 0.72544300  |
| H | -5.92168900 | 1.55554300  | 1.62260000  |
| O | -1.46156900 | -1.08724100 | -1.09714800 |
| H | -1.46043900 | -1.18010500 | -2.05803600 |
| C | 4.70516400  | 1.31714900  | 0.17222300  |
| C | 4.90014000  | 0.02342500  | 0.97022900  |
| N | 2.76740000  | 0.00505900  | -0.00837800 |
| H | 5.38038900  | 1.40126400  | -0.68293300 |
| H | 5.02342200  | 0.19334100  | 2.04265700  |

|    |            |             |             |
|----|------------|-------------|-------------|
| C  | 3.62224300 | -0.77870500 | 0.77055200  |
| O  | 3.36830200 | -1.87471500 | 1.19553800  |
| C  | 3.28344600 | 1.25207400  | -0.36342400 |
| O  | 2.69698300 | 2.09449100  | -0.99232300 |
| Br | 1.05862400 | -0.52044500 | -0.45704100 |
| H  | 4.81061000 | 2.22641700  | 0.76734200  |
| H  | 5.74439800 | -0.58187500 | 0.63400100  |

### INT3'

|    |             |             |             |
|----|-------------|-------------|-------------|
| C  | 3.58464200  | 0.90409700  | 1.35372600  |
| C  | 4.74287400  | 0.83798200  | 0.34092400  |
| C  | 2.23049400  | 0.75469500  | 0.65873900  |
| C  | 4.36938300  | -0.04835400 | -0.86082600 |
| C  | 2.10236200  | -0.65061100 | 0.05233000  |
| C  | 3.46213900  | -1.19040400 | -0.41383300 |
| H  | 3.71558500  | 0.08749000  | 2.07680400  |
| H  | 3.85616300  | 0.54700000  | -1.62446100 |
| H  | 2.14832900  | 1.48435800  | -0.15758300 |
| H  | 3.62779900  | 1.84055000  | 1.91964800  |
| H  | 4.93375200  | 1.85862800  | -0.02957000 |
| H  | 1.40796100  | 0.95573200  | 1.35037000  |
| H  | 5.28425400  | -0.43685100 | -1.32166500 |
| H  | 1.66124000  | -1.34091400 | 0.78709000  |
| H  | 3.29155300  | -1.91669600 | -1.21366100 |
| H  | 3.94311400  | -1.72068600 | 0.41626200  |
| N  | 5.91365800  | 0.26473700  | 1.01157800  |
| H  | 6.73973900  | 0.33923900  | 0.42468000  |
| H  | 6.11421000  | 0.76046700  | 1.87611800  |
| O  | 1.28501000  | -0.65321800 | -1.12324300 |
| C  | -4.88915300 | -0.72369800 | 1.09689800  |
| C  | -5.31118900 | 0.64379300  | 0.55771600  |
| N  | -3.01805000 | 0.19032500  | -0.07979700 |
| H  | -5.46647400 | -1.56347300 | 0.70075000  |
| H  | -5.60059900 | 1.35435400  | 1.33447800  |
| C  | -4.05117900 | 1.16230200  | -0.15169500 |
| O  | -3.94192100 | 2.22745000  | -0.69588000 |
| C  | -3.47217100 | -0.80573400 | 0.59795900  |
| O  | -2.77431400 | -1.89038000 | 0.86714800  |
| Br | -0.46206600 | -0.17728300 | -0.78079300 |
| H  | -4.90174800 | -0.79960000 | 2.18763800  |
| H  | -6.12566300 | 0.59324700  | -0.16811100 |
| H  | -1.88558500 | -1.79861600 | 0.47065600  |

### TS4'

|   |            |            |             |
|---|------------|------------|-------------|
| C | 2.82503600 | 1.38302900 | -0.44723900 |
| C | 4.13753900 | 0.58377900 | -0.33823000 |

|    |             |             |             |
|----|-------------|-------------|-------------|
| C  | 1.63669000  | 0.46465400  | -0.73650200 |
| C  | 3.87078700  | -0.84534200 | 0.17032600  |
| C  | 1.39739900  | -0.45407600 | 0.46566100  |
| C  | 2.70860200  | -0.84810000 | 1.15843700  |
| H  | 2.65966300  | 1.89917200  | 0.50893500  |
| H  | 3.63816400  | -1.50712300 | -0.67170300 |
| H  | 1.84936200  | -0.16512100 | -1.60981100 |
| H  | 2.91150400  | 2.15661800  | -1.21647200 |
| H  | 4.58183500  | 0.51286000  | -1.34436500 |
| H  | 0.73832500  | 1.04078900  | -0.98075500 |
| H  | 4.77840800  | -1.23862700 | 0.64064700  |
| H  | 0.73116900  | 0.03235600  | 1.19475200  |
| H  | 2.57334800  | -1.82475200 | 1.63231800  |
| H  | 2.91990100  | -0.12353300 | 1.95339700  |
| N  | 5.01952700  | 1.26804900  | 0.61148800  |
| H  | 5.94726000  | 0.85355300  | 0.60644800  |
| H  | 5.12838400  | 2.24757900  | 0.36235900  |
| O  | 0.79869000  | -1.69922600 | 0.08118700  |
| C  | -2.51347600 | 0.91097900  | 1.71446000  |
| C  | -1.76352700 | 1.84294600  | 0.73949200  |
| N  | -3.40360100 | 0.64691900  | -0.47739800 |
| H  | -3.01558200 | 1.42528800  | 2.53695500  |
| H  | -0.68534300 | 1.66852000  | 0.71038900  |
| C  | -2.34658800 | 1.54991800  | -0.65899800 |
| O  | -1.95881500 | 2.01728600  | -1.69692100 |
| C  | -3.50992200 | 0.28637700  | 0.79226000  |
| O  | -4.45729500 | -0.54510100 | 0.91073000  |
| Br | -0.90235100 | -1.44617200 | -0.55675300 |
| H  | -1.87985500 | 0.12609800  | 2.13933900  |
| H  | -1.92294600 | 2.90185700  | 0.95906000  |
| H  | -4.39867200 | -0.22294300 | -0.39175600 |

#### INT4'

|   |             |             |             |
|---|-------------|-------------|-------------|
| C | -1.99611500 | -1.72896300 | -0.72804500 |
| C | -3.51559700 | -1.50476800 | -0.84642500 |
| C | -1.23513000 | -0.40166500 | -0.72738800 |
| C | -3.92448400 | -0.16142200 | -0.21371900 |
| C | -1.58339000 | 0.39416500  | 0.53415600  |
| C | -3.03051700 | 0.15268500  | 0.98136900  |
| H | -1.79687500 | -2.25376100 | 0.21574000  |
| H | -3.84176800 | 0.64285000  | -0.95393100 |
| H | -1.51478800 | 0.19510900  | -1.60536900 |
| H | -1.64461400 | -2.37740800 | -1.53753700 |
| H | -3.77695200 | -1.47496500 | -1.91707300 |
| H | -0.15612300 | -0.57491300 | -0.78022200 |
| H | -4.97629000 | -0.20809400 | 0.08874800  |
| H | -0.88408200 | 0.15389800  | 1.34166800  |

|    |             |             |             |
|----|-------------|-------------|-------------|
| H  | -3.37677600 | 1.02986300  | 1.53578100  |
| H  | -3.04628400 | -0.69792800 | 1.67247100  |
| N  | -4.19971100 | -2.59126600 | -0.13908800 |
| H  | -5.19964700 | -2.56620900 | -0.31747700 |
| H  | -3.86117800 | -3.49704500 | -0.45257000 |
| O  | -1.53379800 | 1.81389600  | 0.28704600  |
| C  | 3.34169400  | -2.07934500 | 1.06016400  |
| C  | 4.34695000  | -1.73031600 | -0.04317500 |
| N  | 2.53462100  | -0.23896700 | -0.15509400 |
| H  | 3.74940700  | -1.98185600 | 2.06900600  |
| H  | 4.48809100  | -2.52896800 | -0.77499900 |
| C  | 3.75236200  | -0.52481600 | -0.76127200 |
| O  | 4.22666200  | 0.08528400  | -1.68675300 |
| C  | 2.21088600  | -1.07204200 | 0.90300000  |
| O  | 1.19889800  | -0.99963500 | 1.56023200  |
| Br | 0.17037900  | 2.41984700  | 0.01050200  |
| H  | 2.92215000  | -3.08393300 | 0.97192200  |
| H  | 5.33398300  | -1.45307000 | 0.33339900  |
| H  | 1.94005100  | 0.53596400  | -0.43403700 |

#### COM2<sub>a</sub>

|   |             |             |             |
|---|-------------|-------------|-------------|
| C | -0.43185800 | 2.27247900  | 1.16953700  |
| C | -0.66816300 | 2.90781300  | -0.19881500 |
| C | -0.05227400 | 3.36013100  | 2.18579200  |
| C | -1.92008400 | 3.79767900  | -0.15949700 |
| C | -0.76685800 | 4.69394500  | 1.91991900  |
| C | -2.10584800 | 4.46392400  | 1.21916400  |
| H | -1.34889300 | 1.75847000  | 1.48177200  |
| H | -1.84535700 | 4.55894600  | -0.94415600 |
| H | 1.02450000  | 3.56090700  | 2.15796400  |
| H | 0.34317800  | 1.50067400  | 1.11001200  |
| H | 0.19896500  | 3.53732400  | -0.43787500 |
| H | -0.28906700 | 3.01569200  | 3.19724400  |
| H | -2.79929300 | 3.18410900  | -0.38564800 |
| H | -0.93005700 | 5.21547800  | 2.87317500  |
| H | -2.65074000 | 5.40985700  | 1.11707300  |
| H | -2.71807700 | 3.82448400  | 1.86662400  |
| N | -0.80881400 | 1.86850600  | -1.23401200 |
| H | -1.01823000 | 2.28405000  | -2.13965500 |
| H | 0.06235000  | 1.32641600  | -1.30795500 |
| O | 0.10555600  | 5.47879700  | 1.10327000  |
| H | -0.31149200 | 6.32966400  | 0.92503500  |
| C | -5.88389700 | -2.14111000 | -0.39153400 |
| C | -4.82388100 | -3.02012100 | 0.27764100  |
| N | -3.79478500 | -1.04630400 | -0.49284600 |
| H | -6.69452800 | -1.84242900 | 0.27681200  |
| H | -4.67306500 | -3.98371500 | -0.21476600 |



|    |             |             |             |
|----|-------------|-------------|-------------|
| C  | -3.53486700 | -2.21745700 | 0.16688000  |
| O  | -2.44553000 | -2.55927000 | 0.59552800  |
| C  | -5.13353700 | -0.88698700 | -0.83234900 |
| O  | -5.60596800 | 0.07862100  | -1.38096200 |
| Br | -2.42059900 | 0.30700600  | -0.83795000 |
| H  | -6.33648300 | -2.59699100 | -1.27521100 |
| H  | -5.01751100 | -3.21756600 | 1.33458000  |
| C  | 4.33259400  | 2.50484300  | -0.37909700 |
| C  | 5.19828500  | 1.75758800  | -1.40947000 |
| C  | 2.86077000  | 2.11747700  | -0.51446700 |
| C  | 4.59897200  | 0.37435300  | -1.72507500 |
| C  | 2.64667300  | 0.63801900  | -0.16042300 |
| C  | 3.89934300  | -0.19270200 | -0.49301700 |
| H  | 4.68785700  | 2.23679300  | 0.62488000  |
| H  | 3.87145400  | 0.45683600  | -2.54153400 |
| H  | 2.53358000  | 2.26454500  | -1.55345200 |
| H  | 4.46254100  | 3.58708700  | -0.48603300 |
| H  | 5.21142300  | 2.34927100  | -2.34008400 |
| H  | 2.22865300  | 2.75539500  | 0.11181600  |
| H  | 5.39463400  | -0.29439900 | -2.07214800 |
| H  | 2.43292300  | 0.54867500  | 0.91657100  |
| H  | 3.59946000  | -1.23354100 | -0.65104400 |
| H  | 4.59858600  | -0.17802700 | 0.35270500  |
| N  | 6.54125700  | 1.58201100  | -0.84825100 |
| H  | 7.18240100  | 1.22428700  | -1.55070100 |
| H  | 6.91578400  | 2.47023100  | -0.52507000 |
| O  | 1.51587000  | 0.17840300  | -0.89295700 |
| H  | 1.07079600  | -0.53198100 | -0.38125700 |
| C  | 2.79469200  | -3.82244800 | 1.81885800  |
| C  | 3.06594600  | -4.19643000 | 0.35073500  |
| C  | 1.97050000  | -2.53870100 | 1.90509500  |
| C  | 1.88552900  | -3.78505500 | -0.55183200 |
| C  | 0.56939300  | -2.74786600 | 1.31572800  |
| C  | 0.57538100  | -3.83196500 | 0.22799200  |
| H  | 2.24628000  | -4.64897700 | 2.28948600  |
| H  | 2.03698600  | -2.76762500 | -0.93532100 |
| H  | 2.47067800  | -1.75441500 | 1.32162000  |
| H  | 3.74090600  | -3.71548700 | 2.36067700  |
| H  | 3.96319200  | -3.64461400 | 0.02134600  |
| H  | 1.90085200  | -2.16851000 | 2.93209300  |
| H  | 1.85194900  | -4.44619800 | -1.42504900 |
| H  | -0.13395400 | -3.03725400 | 2.10747300  |
| H  | -0.29522900 | -3.68250600 | -0.41777300 |
| H  | 0.46774100  | -4.82089700 | 0.68946400  |
| N  | 3.25110700  | -5.64844800 | 0.26699200  |
| H  | 3.56733500  | -5.91796300 | -0.66028700 |
| H  | 3.95911300  | -5.95952600 | 0.92703500  |

|   |             |             |            |
|---|-------------|-------------|------------|
| O | 0.15176800  | -1.48650200 | 0.78842700 |
| H | -0.79694900 | -1.55696900 | 0.57756500 |

**TS3<sub>a</sub>**

|    |             |             |             |
|----|-------------|-------------|-------------|
| C  | 1.49303500  | -2.54552600 | -0.79713700 |
| C  | 1.67780400  | -1.97953700 | 0.60898400  |
| C  | 2.63473800  | -3.52721700 | -1.10486300 |
| C  | 1.47026500  | -3.08826100 | 1.65367200  |
| C  | 3.08421200  | -4.32017400 | 0.13248400  |
| C  | 1.93771800  | -4.46239300 | 1.13309100  |
| H  | 0.52551700  | -3.05802900 | -0.84494400 |
| H  | 2.00980000  | -2.82333300 | 2.56986900  |
| H  | 3.51389900  | -2.99208400 | -1.48123800 |
| H  | 1.45357600  | -1.74119000 | -1.53910500 |
| H  | 2.71321700  | -1.61457200 | 0.68919700  |
| H  | 2.31845100  | -4.22251700 | -1.88849600 |
| H  | 0.40461000  | -3.13915500 | 1.90414500  |
| H  | 3.43505600  | -5.31318500 | -0.17999600 |
| H  | 2.23704800  | -5.10623400 | 1.96852300  |
| H  | 1.11050500  | -4.97667400 | 0.62966900  |
| N  | 0.81803300  | -0.80496000 | 0.83972700  |
| H  | 0.88482500  | -0.50614600 | 1.81289400  |
| H  | 0.95139500  | 0.17926400  | -0.09903300 |
| O  | 4.17675500  | -3.60271900 | 0.71413100  |
| H  | 4.49388700  | -4.08782200 | 1.48464200  |
| C  | -5.47052500 | -2.31124400 | -0.52635800 |
| C  | -5.14332700 | -1.37084600 | -1.68343500 |
| N  | -3.33088600 | -1.30566200 | -0.14277300 |
| H  | -5.61525400 | -3.35231400 | -0.82408500 |
| H  | -5.84451400 | -0.54081600 | -1.80137500 |
| C  | -3.77751700 | -0.81337100 | -1.30098700 |
| O  | -3.19014400 | 0.01768800  | -2.02882100 |
| C  | -4.23352900 | -2.22238700 | 0.37822800  |
| O  | -4.07214200 | -2.85937600 | 1.39665100  |
| Br | -1.11267700 | -1.10646000 | 0.49544500  |
| H  | -6.34720300 | -2.00922300 | 0.05191700  |
| H  | -5.05944600 | -1.86856200 | -2.65328500 |
| C  | 4.47964800  | 1.40528100  | -1.63198300 |
| C  | 4.84953600  | 1.50478700  | -0.13947000 |
| C  | 3.10593000  | 0.75903700  | -1.80513800 |
| C  | 3.58629500  | 1.65508800  | 0.72967100  |
| C  | 2.01310200  | 1.68426600  | -1.25077900 |
| C  | 2.52022700  | 2.45578700  | -0.01518500 |
| H  | 4.46192500  | 2.42038200  | -2.05142300 |
| H  | 3.19432200  | 0.66309900  | 0.98952000  |
| H  | 3.08013000  | -0.18584400 | -1.24486200 |
| H  | 5.24858600  | 0.84664900  | -2.17519300 |

|   |             |            |             |
|---|-------------|------------|-------------|
| H | 5.35677200  | 0.56991200 | 0.15047500  |
| H | 2.89352600  | 0.51246900 | -2.84945000 |
| H | 3.85218600  | 2.14438100 | 1.67330900  |
| H | 1.71341300  | 2.39873200 | -2.02882600 |
| H | 1.66766900  | 2.68911900 | 0.63221900  |
| H | 2.96202200  | 3.40990900 | -0.32715200 |
| N | 5.69943800  | 2.68280100 | 0.05344500  |
| H | 6.09974200  | 2.69252700 | 0.98731300  |
| H | 6.47455000  | 2.68063800 | -0.60412800 |
| O | 0.85476000  | 0.91370500 | -0.94838500 |
| H | -0.26072600 | 1.27753800 | -1.28150100 |
| C | -1.29091400 | 4.71453300 | 0.36899500  |
| C | -1.08742800 | 3.92745600 | 1.67932000  |
| C | -0.97544300 | 3.84535700 | -0.84976400 |
| C | -1.38933900 | 2.43047900 | 1.47479200  |
| C | -1.97589400 | 2.68702600 | -0.95145100 |
| C | -2.48519400 | 2.25511300 | 0.42830300  |
| H | -2.33747800 | 5.04324800 | 0.32620300  |
| H | -0.48242100 | 1.90648200 | 1.14251600  |
| H | 0.03287600  | 3.42996100 | -0.73376300 |
| H | -0.67127500 | 5.61743300 | 0.36916600  |
| H | -0.03012400 | 4.03193000 | 1.97926000  |
| H | -0.97297300 | 4.42906400 | -1.77448900 |
| H | -1.68256300 | 1.97633900 | 2.42793100  |
| H | -2.82464000 | 2.97497500 | -1.58149800 |
| H | -2.84691300 | 1.22423000 | 0.37917100  |
| H | -3.33901500 | 2.88426400 | 0.70688300  |
| N | -2.00344600 | 4.46567300 | 2.68766700  |
| H | -1.82242300 | 4.05476600 | 3.59910100  |
| H | -1.88917700 | 5.47141400 | 2.78211600  |
| O | -1.33302600 | 1.59898100 | -1.64722700 |
| H | -2.03166300 | 0.82435100 | -1.77597100 |

**COM2c**

|   |             |            |             |
|---|-------------|------------|-------------|
| C | -0.58189600 | 2.32861100 | 0.79915300  |
| C | -0.89891800 | 2.56506200 | -0.67483600 |
| C | -0.63958600 | 3.66148500 | 1.56311900  |
| C | -2.36146100 | 3.00640600 | -0.83827600 |
| C | -1.72078600 | 4.60978500 | 1.02196000  |
| C | -2.85744800 | 3.82152500 | 0.37229700  |
| H | -1.31011500 | 1.61724400 | 1.20738400  |
| H | -2.46251600 | 3.59176900 | -1.75897000 |
| H | 0.31701500  | 4.18953700 | 1.49104600  |
| H | 0.40151700  | 1.85650100 | 0.90240200  |
| H | -0.24489200 | 3.37247800 | -1.03271900 |
| H | -0.82376400 | 3.46833600 | 2.62455500  |
| H | -2.98572100 | 2.11229400 | -0.95195200 |

|    |             |             |             |
|----|-------------|-------------|-------------|
| H  | -2.11337600 | 5.22181400  | 1.84576400  |
| H  | -3.66916400 | 4.49531300  | 0.07343300  |
| H  | -3.27807800 | 3.15038500  | 1.13104900  |
| N  | -0.65477700 | 1.34220300  | -1.45528600 |
| H  | -0.82458200 | 1.49659100  | -2.44656300 |
| H  | 0.30680200  | 1.01544700  | -1.32768700 |
| O  | -1.08735700 | 5.46465900  | 0.06773900  |
| H  | -1.73943000 | 6.08515500  | -0.27786900 |
| C  | -3.26019700 | -4.30363600 | 0.71312200  |
| C  | -1.77095400 | -4.46018900 | 1.03832800  |
| N  | -2.10808800 | -2.38597400 | -0.02029300 |
| H  | -3.90382100 | -4.31319000 | 1.59564400  |
| H  | -1.29360600 | -5.29523500 | 0.52004100  |
| C  | -1.13139300 | -3.16786600 | 0.55206300  |
| O  | 0.04427100  | -2.86601000 | 0.64306400  |
| C  | -3.38266300 | -2.93625400 | 0.04524000  |
| O  | -4.39279200 | -2.41631000 | -0.35960100 |
| Br | -1.62695800 | -0.65813300 | -0.71961100 |
| H  | -3.63962500 | -5.05769200 | 0.01992700  |
| H  | -1.56106000 | -4.57136800 | 2.10459400  |
| C  | 4.88892100  | 0.82560000  | 0.34683300  |
| C  | 5.48256300  | -0.28940200 | -0.53413300 |
| C  | 3.38874600  | 0.97665900  | 0.09849200  |
| C  | 4.44326500  | -1.39703200 | -0.79500700 |
| C  | 2.63278100  | -0.28377700 | 0.54009000  |
| C  | 3.50947400  | -1.53873300 | 0.40311500  |
| H  | 5.06224700  | 0.56010400  | 1.39814000  |
| H  | 3.84992600  | -1.15215200 | -1.68409900 |
| H  | 3.20550800  | 1.11127300  | -0.97598500 |
| H  | 5.41278700  | 1.77044100  | 0.16553800  |
| H  | 5.76399200  | 0.15488500  | -1.50387100 |
| H  | 2.98707600  | 1.86138400  | 0.60345400  |
| H  | 4.96352300  | -2.33778500 | -1.00709000 |
| H  | 2.32072700  | -0.17727900 | 1.59068300  |
| H  | 2.85715700  | -2.41417500 | 0.31538000  |
| H  | 4.11189900  | -1.67377300 | 1.30960200  |
| N  | 6.63576500  | -0.86712000 | 0.16263600  |
| H  | 7.13578700  | -1.51334600 | -0.44120700 |
| H  | 7.29333700  | -0.14211400 | 0.43716400  |
| O  | 1.47540000  | -0.36410900 | -0.28223800 |
| H  | 0.93481800  | -1.12727500 | -0.01189300 |

**TS3c**

|   |            |             |             |
|---|------------|-------------|-------------|
| C | 0.57396200 | -2.35146500 | 0.73767200  |
| C | 0.79543100 | -2.41749000 | -0.77868700 |
| C | 1.30950000 | -3.51055100 | 1.41026300  |
| C | 2.24157000 | -2.83835300 | -1.12830600 |

|    |             |             |             |
|----|-------------|-------------|-------------|
| C  | 2.83179100  | -3.37402600 | 1.26495200  |
| C  | 3.20677100  | -2.55328400 | 0.02303000  |
| H  | 0.93922500  | -1.39281500 | 1.12738800  |
| H  | 2.26296300  | -3.91303000 | -1.34249000 |
| H  | 1.02209900  | -4.45553900 | 0.93128100  |
| H  | -0.49804100 | -2.39593600 | 0.95749500  |
| H  | 0.10531800  | -3.17203100 | -1.18457400 |
| H  | 1.03489900  | -3.59586500 | 2.46478100  |
| H  | 2.56060100  | -2.32199600 | -2.04087600 |
| H  | 3.24346600  | -2.87682800 | 2.15515600  |
| H  | 4.23580600  | -2.79165100 | -0.27015700 |
| H  | 3.19229600  | -1.48580300 | 0.26591800  |
| N  | 0.37876700  | -1.15258900 | -1.41311700 |
| H  | 0.38756100  | -1.25003200 | -2.42777300 |
| H  | -0.71014600 | -0.48303700 | -0.91027600 |
| O  | 3.33384400  | -4.70489800 | 1.19067700  |
| H  | 4.29712500  | -4.68000900 | 1.20955200  |
| C  | 0.73825300  | 4.35339500  | 1.14785300  |
| C  | 2.19471000  | 4.74348300  | 0.91275500  |
| N  | 1.78090100  | 2.59525500  | -0.07219300 |
| H  | 0.01156000  | 5.02933100  | 0.68949600  |
| H  | 2.76988400  | 4.89219800  | 1.82949000  |
| C  | 2.77330900  | 3.54204100  | 0.15151200  |
| O  | 3.92641400  | 3.44070800  | -0.20441900 |
| C  | 0.63256100  | 2.99006900  | 0.47507300  |
| O  | -0.46517400 | 2.36896600  | 0.47990400  |
| Br | 1.45208200  | 0.44515100  | -0.99268900 |
| H  | 0.46803100  | 4.24862100  | 2.20217400  |
| H  | 2.31775200  | 5.63750100  | 0.29666900  |
| O  | -1.41552200 | 0.31129200  | -0.47549800 |
| H  | -0.90561800 | 1.18733100  | -0.08180700 |
| C  | -4.54930600 | -1.55170300 | 0.11072400  |
| C  | -5.39624200 | -0.34701700 | -0.34321600 |
| C  | -3.09407800 | -1.39437000 | -0.32947900 |
| C  | -4.54274900 | 0.93404000  | -0.40799200 |
| C  | -2.44972900 | -0.19938200 | 0.38609700  |
| C  | -3.46625800 | 0.91014100  | 0.67296500  |
| H  | -4.59613500 | -1.61067300 | 1.20601400  |
| H  | -4.06927700 | 1.02321600  | -1.39292300 |
| H  | -3.05605800 | -1.20327300 | -1.41004900 |
| H  | -4.97233700 | -2.48356100 | -0.27823400 |
| H  | -5.77844100 | -0.55865700 | -1.35573900 |
| H  | -2.52228600 | -2.31115600 | -0.14731200 |
| H  | -5.19318300 | 1.80743300  | -0.29067000 |
| H  | -1.98125500 | -0.52362900 | 1.32542400  |
| H  | -2.93571100 | 1.86368700  | 0.75217400  |
| H  | -3.94120400 | 0.72009400  | 1.64209100  |

|   |             |             |            |
|---|-------------|-------------|------------|
| N | -6.47570800 | -0.15206200 | 0.62769600 |
| H | -7.13266200 | 0.55158300  | 0.30270800 |
| H | -7.00029500 | -1.01168000 | 0.76586300 |

**COM2a**

|    |             |             |             |
|----|-------------|-------------|-------------|
| C  | 2.31548100  | -2.05553600 | 0.84361000  |
| C  | 2.03392500  | -2.14874900 | -0.66200000 |
| C  | 3.80952100  | -2.24283700 | 1.10170400  |
| C  | 3.13191600  | -1.44651500 | -1.49174700 |
| C  | 4.63185000  | -1.09075200 | 0.50634600  |
| C  | 3.89301600  | -0.41662300 | -0.65720400 |
| H  | 1.97842400  | -1.07984100 | 1.21759300  |
| H  | 3.84384700  | -2.19170100 | -1.86416700 |
| H  | 4.15101900  | -3.16625300 | 0.61634900  |
| H  | 1.73038700  | -2.81467900 | 1.37367300  |
| H  | 2.02505700  | -3.21532900 | -0.93379500 |
| H  | 4.02211500  | -2.35004900 | 2.16865200  |
| H  | 2.67447000  | -0.97040900 | -2.36684300 |
| H  | 4.82974600  | -0.33865500 | 1.28437000  |
| H  | 4.61474500  | 0.12863500  | -1.27732700 |
| H  | 3.19362200  | 0.32940100  | -0.26541100 |
| N  | 0.71466300  | -1.55846500 | -0.93710600 |
| H  | 0.39608800  | -1.77560600 | -1.87818800 |
| H  | 0.01800800  | -1.87471900 | -0.25016300 |
| O  | 5.86445600  | -1.66906200 | 0.08568600  |
| H  | 6.45629800  | -0.96795900 | -0.20927000 |
| C  | -0.71629700 | 4.33919400  | 1.42344400  |
| C  | -0.34830000 | 4.89803400  | 0.04480000  |
| N  | -0.04866700 | 2.56578400  | 0.02848100  |
| H  | -1.75606500 | 4.51677300  | 1.70749700  |
| H  | 0.48276100  | 5.60669200  | 0.06646200  |
| C  | 0.07741100  | 3.68774000  | -0.78231500 |
| O  | 0.45352100  | 3.68763500  | -1.92823900 |
| C  | -0.49906300 | 2.83653000  | 1.30654400  |
| O  | -0.68447600 | 2.00760300  | 2.17179400  |
| Br | 0.36129000  | 0.76858700  | -0.49150400 |
| H  | -0.08471200 | 4.71523600  | 2.23173500  |
| H  | -1.18180300 | 5.38552600  | -0.46613900 |
| C  | -3.02602100 | -2.90229500 | 0.91955700  |
| C  | -2.53955300 | -1.55087300 | 1.48032400  |
| C  | -4.31978000 | -2.73618000 | 0.12091200  |
| C  | -2.97141100 | -0.39260100 | 0.56449100  |
| C  | -4.08435800 | -1.87709600 | -1.12853800 |
| C  | -2.96719000 | -0.84667100 | -0.89126600 |
| H  | -2.24083700 | -3.30516300 | 0.26424400  |
| H  | -3.98554000 | -0.07322500 | 0.83149800  |
| H  | -5.07454700 | -2.22704800 | 0.73253400  |

|   |             |             |             |
|---|-------------|-------------|-------------|
| H | -3.15999600 | -3.62724100 | 1.72941400  |
| H | -3.00124700 | -1.39438600 | 2.46733000  |
| H | -4.74396700 | -3.70346400 | -0.16252300 |
| H | -2.31299200 | 0.46536200  | 0.73016900  |
| H | -3.80348500 | -2.52708900 | -1.97166900 |
| H | -3.08987700 | -0.00216600 | -1.57984300 |
| H | -1.99536800 | -1.29879900 | -1.12767100 |
| N | -1.07006600 | -1.57786100 | 1.57682700  |
| H | -0.72952000 | -0.67711900 | 1.91745300  |
| H | -0.78361900 | -2.27833700 | 2.25801200  |
| O | -5.32958400 | -1.24806200 | -1.41383900 |
| H | -5.24786900 | -0.74867500 | -2.23395200 |

### TS3a

|    |             |             |             |
|----|-------------|-------------|-------------|
| C  | 2.11933900  | -1.97424900 | 1.09409700  |
| C  | 1.64113500  | -2.19262300 | -0.34904300 |
| C  | 3.58289300  | -2.39272500 | 1.22790400  |
| C  | 2.74368500  | -1.81212600 | -1.36850800 |
| C  | 4.50667200  | -1.48109300 | 0.40801200  |
| C  | 3.76246900  | -0.84045600 | -0.77095400 |
| H  | 2.00260200  | -0.91590800 | 1.36504800  |
| H  | 3.27337500  | -2.71882100 | -1.68415300 |
| H  | 3.70740000  | -3.41158800 | 0.83895100  |
| H  | 1.49275400  | -2.55693600 | 1.78008300  |
| H  | 1.43167200  | -3.26712300 | -0.46413500 |
| H  | 3.90000700  | -2.41285100 | 2.27399000  |
| H  | 2.27847100  | -1.38283700 | -2.26284900 |
| H  | 4.90355200  | -0.68356500 | 1.05323100  |
| H  | 4.49018900  | -0.53003900 | -1.53022300 |
| H  | 3.25514400  | 0.07093300  | -0.43853600 |
| N  | 0.35971500  | -1.49911400 | -0.55935900 |
| H  | -0.03797300 | -1.78661200 | -1.45265700 |
| H  | -0.49585800 | -1.37045600 | 0.58675700  |
| O  | 5.57890400  | -2.31112100 | -0.03020500 |
| H  | 6.23640100  | -1.76466900 | -0.47508100 |
| C  | -0.40116400 | 4.36652100  | 1.40975300  |
| C  | 0.25790100  | 5.02510500  | 0.19812500  |
| N  | 0.21930000  | 2.66884500  | -0.12980500 |
| H  | -1.44286600 | 4.65923600  | 1.56498600  |
| H  | 1.16593400  | 5.58374900  | 0.43689200  |
| C  | 0.63233600  | 3.84910100  | -0.71514100 |
| O  | 1.20008500  | 3.95060600  | -1.78200500 |
| C  | -0.35573800 | 2.87527400  | 1.07999000  |
| O  | -0.79803700 | 1.99746100  | 1.82987900  |
| Br | 0.43797000  | 0.55158400  | -0.60551200 |
| H  | 0.12921600  | 4.53369500  | 2.35084400  |
| H  | -0.40463200 | 5.69545100  | -0.35486200 |

|   |             |             |             |
|---|-------------|-------------|-------------|
| C | -2.97783700 | -2.49287500 | 1.04713100  |
| C | -2.58203500 | -1.04478100 | 1.37790200  |
| C | -4.31814100 | -2.51412200 | 0.31099400  |
| C | -3.04188600 | -0.06442300 | 0.28453000  |
| C | -4.20623100 | -1.84025700 | -1.06424000 |
| C | -3.11009200 | -0.76218800 | -1.07025000 |
| H | -2.20285200 | -2.94081600 | 0.40894100  |
| H | -4.04472800 | 0.29374600  | 0.54212400  |
| H | -5.06575700 | -1.95666100 | 0.88860700  |
| H | -3.02227100 | -3.09574600 | 1.96022400  |
| H | -3.03425600 | -0.74536200 | 2.32990600  |
| H | -4.69739000 | -3.53353100 | 0.20468200  |
| H | -2.38397100 | 0.80875100  | 0.26933000  |
| H | -3.97118500 | -2.59895900 | -1.82596100 |
| H | -3.30443900 | -0.04094500 | -1.87158900 |
| H | -2.14347100 | -1.22388200 | -1.30277600 |
| N | -1.10112400 | -0.97244400 | 1.54991100  |
| H | -0.82259900 | 0.01551100  | 1.70011400  |
| H | -0.81628700 | -1.51446000 | 2.36573100  |
| O | -5.48939300 | -1.28660400 | -1.32673200 |
| H | -5.50267800 | -0.92298700 | -2.21922700 |

**COM2e**

|   |             |             |             |
|---|-------------|-------------|-------------|
| C | 0.48604800  | 1.64327000  | 0.98374400  |
| C | 0.48086500  | 1.95451300  | -0.51053200 |
| C | 1.17649300  | 2.78500700  | 1.74576200  |
| C | -0.42563500 | 3.16129400  | -0.79679700 |
| C | 0.90751900  | 4.16148400  | 1.11726500  |
| C | -0.42663700 | 4.16698500  | 0.37173000  |
| H | -0.54995800 | 1.52606700  | 1.32335800  |
| H | -0.09450900 | 3.65008000  | -1.71981700 |
| H | 2.26276800  | 2.64289800  | 1.75784000  |
| H | 0.98052200  | 0.68505300  | 1.17564900  |
| H | 1.50738700  | 2.20899700  | -0.80812300 |
| H | 0.84011100  | 2.78708700  | 2.78715700  |
| H | -1.44797100 | 2.80449200  | -0.96622800 |
| H | 0.89817700  | 4.92639600  | 1.90613300  |
| H | -0.65813700 | 5.17529600  | 0.00875800  |
| H | -1.21481400 | 3.90949000  | 1.08971700  |
| N | 0.03261700  | 0.78310000  | -1.28365000 |
| H | -0.03296700 | 1.00556700  | -2.27503900 |
| H | 0.69135100  | 0.00307800  | -1.15463200 |
| O | 1.98856300  | 4.43006000  | 0.22095200  |
| H | 1.85713800  | 5.29839200  | -0.17718900 |
| C | -6.02269100 | -1.24378500 | 0.01675000  |
| C | -5.29175400 | -2.23293100 | 0.92774600  |
| N | -3.69414200 | -0.88132200 | -0.15287700 |



|    |             |             |             |
|----|-------------|-------------|-------------|
| H  | -6.69598400 | -0.56921400 | 0.55058700  |
| H  | -5.44289300 | -3.27993100 | 0.65415400  |
| C  | -3.81672600 | -1.89893400 | 0.75133800  |
| O  | -2.89619000 | -2.45616400 | 1.32771800  |
| C  | -4.91521400 | -0.41208700 | -0.62487800 |
| O  | -5.05911300 | 0.49544400  | -1.40744400 |
| H  | -6.59770600 | -1.72226200 | -0.77931500 |
| H  | -5.54411000 | -2.12972500 | 1.98574500  |
| C  | 5.10641600  | -0.24494100 | -0.05722700 |
| C  | 5.62155800  | -1.50568200 | -0.77589500 |
| C  | 3.60235300  | -0.07074900 | -0.26463600 |
| C  | 4.53595800  | -2.59833200 | -0.81544800 |
| C  | 2.81933800  | -1.22055700 | 0.38664600  |
| C  | 3.65412300  | -2.51086700 | 0.42628300  |
| H  | 5.31733000  | -0.35280700 | 1.01494800  |
| H  | 3.90889800  | -2.47340600 | -1.70644500 |
| H  | 3.37559900  | -0.08154500 | -1.33986600 |
| H  | 5.65275600  | 0.63920100  | -0.40286800 |
| H  | 5.87150600  | -1.22999600 | -1.81410200 |
| H  | 3.25803500  | 0.89428200  | 0.12349100  |
| H  | 5.01495000  | -3.58049000 | -0.89700800 |
| H  | 2.53915500  | -0.94479900 | 1.41488800  |
| H  | 2.97156900  | -3.36431600 | 0.49834400  |
| H  | 4.29074700  | -2.52295800 | 1.31916200  |
| N  | 6.78626200  | -2.01303100 | -0.04430600 |
| H  | 7.23909000  | -2.76181800 | -0.56072700 |
| H  | 7.47729100  | -1.27924500 | 0.08840600  |
| O  | 1.63420400  | -1.40616700 | -0.37991900 |
| H  | 0.97298700  | -1.85708500 | 0.18512100  |
| O  | -0.11481700 | -2.31074800 | 1.50617700  |
| H  | -1.06954600 | -2.19319800 | 1.33473000  |
| H  | -0.04636100 | -3.14359600 | 1.98302900  |
| Br | -1.96511000 | -0.10036400 | -0.67614400 |

### TS3<sub>e</sub>

|   |             |            |             |
|---|-------------|------------|-------------|
| C | 0.49996100  | 1.89862500 | 1.03149000  |
| C | 0.58513400  | 2.05651800 | -0.48403000 |
| C | 1.21689200  | 3.07350900 | 1.71552600  |
| C | -0.24419300 | 3.27329400 | -0.92980300 |
| C | 1.05946900  | 4.39029300 | 0.93902300  |
| C | -0.23763900 | 4.39241100 | 0.13091200  |
| H | -0.55520900 | 1.87139800 | 1.32554400  |
| H | 0.15292900  | 3.64723100 | -1.88002700 |
| H | 2.29140300  | 2.87752100 | 1.80289500  |
| H | 0.93119500  | 0.94126100 | 1.34579900  |
| H | 1.63664800  | 2.23899400 | -0.74661200 |
| H | 0.82723300  | 3.19961400 | 2.73028600  |

|    |             |             |             |
|----|-------------|-------------|-------------|
| H  | -1.27617600 | 2.95157600  | -1.10922200 |
| H  | 1.06285100  | 5.23144100  | 1.64559100  |
| H  | -0.39102900 | 5.36924500  | -0.34247700 |
| H  | -1.07167200 | 4.25569600  | 0.82989000  |
| N  | 0.21937200  | 0.81185100  | -1.18166000 |
| H  | 0.20930800  | 0.97899600  | -2.18788700 |
| H  | 0.92287100  | -0.39267600 | -0.80975300 |
| O  | 2.19483800  | 4.50172900  | 0.07668300  |
| H  | 2.13382600  | 5.32873200  | -0.41520500 |
| C  | -5.91226900 | -1.17702000 | 0.51295700  |
| C  | -5.10438900 | -2.38898800 | 0.96971200  |
| N  | -3.60504100 | -0.85897300 | -0.06413300 |
| H  | -6.41329500 | -0.64480000 | 1.32471500  |
| H  | -5.39360000 | -3.32868100 | 0.49182100  |
| C  | -3.68694500 | -2.03425700 | 0.54163800  |
| O  | -2.73649900 | -2.82762300 | 0.77252100  |
| C  | -4.85581300 | -0.25401500 | -0.11045500 |
| O  | -5.08132700 | 0.84126400  | -0.57692100 |
| H  | -6.66493900 | -1.40737200 | -0.24486200 |
| H  | -5.11671800 | -2.55428300 | 2.05026500  |
| C  | 4.78092400  | -0.51146900 | 0.34301300  |
| C  | 5.29962900  | -1.74258600 | -0.42366000 |
| C  | 3.33817500  | -0.18700700 | -0.04471000 |
| C  | 4.14910800  | -2.71793800 | -0.73586000 |
| C  | 2.39486300  | -1.32126500 | 0.38987600  |
| C  | 3.11077800  | -2.67700200 | 0.38147500  |
| H  | 4.82912900  | -0.73070100 | 1.41774900  |
| H  | 3.67183800  | -2.44730500 | -1.68543000 |
| H  | 3.26650800  | -0.08080500 | -1.13581300 |
| H  | 5.43092800  | 0.35090600  | 0.16297300  |
| H  | 5.72794000  | -1.39666700 | -1.37895200 |
| H  | 3.02204500  | 0.76705600  | 0.38921000  |
| H  | 4.55532300  | -3.72765400 | -0.85927400 |
| H  | 2.00527600  | -1.12168900 | 1.39860800  |
| H  | 2.36471400  | -3.47157800 | 0.28132800  |
| H  | 3.61556000  | -2.83260500 | 1.34158000  |
| N  | 6.28916400  | -2.42496000 | 0.41360500  |
| H  | 6.76280300  | -3.15734800 | -0.10748400 |
| H  | 7.00225100  | -1.77558300 | 0.73473700  |
| O  | 1.28507100  | -1.37717200 | -0.51930200 |
| H  | 0.38544000  | -2.11399300 | -0.14006400 |
| O  | -0.38753600 | -2.91040800 | 0.25244800  |
| H  | -1.46205700 | -2.72675800 | 0.45271500  |
| H  | -0.31250900 | -3.74376900 | -0.22489700 |
| Br | -1.57239300 | 0.13395000  | -0.74395600 |

|    |             |             |             |
|----|-------------|-------------|-------------|
| C  | 2.42392900  | 0.93106600  | 0.06176700  |
| C  | 3.09874300  | -0.28652100 | 0.68503700  |
| C  | 3.46078200  | 1.76832500  | -0.70244100 |
| C  | 3.60053600  | -1.24328100 | -0.40903400 |
| C  | 4.53358400  | 0.90439600  | -1.38514700 |
| C  | 3.99309300  | -0.49047800 | -1.69516700 |
| H  | 1.63661600  | 0.58554800  | -0.62048200 |
| H  | 4.45346100  | -1.81497700 | -0.02673700 |
| H  | 3.98125800  | 2.45255500  | -0.02436800 |
| H  | 1.93521000  | 1.52399600  | 0.84241600  |
| H  | 3.95957300  | 0.06931400  | 1.26755900  |
| H  | 2.95281900  | 2.38070300  | -1.45436000 |
| H  | 2.80572400  | -1.95999200 | -0.64401800 |
| H  | 4.85998800  | 1.39418000  | -2.31298600 |
| H  | 4.72962300  | -1.06852600 | -2.26569600 |
| H  | 3.11784300  | -0.37892000 | -2.34670800 |
| N  | 2.16203100  | -0.98752000 | 1.58188200  |
| H  | 2.60126700  | -1.80547100 | 1.99881300  |
| H  | 1.83618400  | -0.36495900 | 2.32916000  |
| O  | 5.64133500  | 0.82734600  | -0.48453900 |
| H  | 6.33752500  | 0.29714500  | -0.88935800 |
| C  | -2.95339100 | -3.49157000 | -1.60016200 |
| C  | -3.75579900 | -2.77141500 | -0.51341000 |
| N  | -1.46599200 | -2.34995800 | -0.16274700 |
| H  | -3.19114300 | -3.16347300 | -2.61438200 |
| H  | -4.34244500 | -3.43856500 | 0.12240000  |
| C  | -2.70752100 | -2.08082800 | 0.34787400  |
| O  | -2.94285500 | -1.38769100 | 1.32350000  |
| C  | -1.49718700 | -3.14341300 | -1.30502500 |
| O  | -0.52995400 | -3.49171300 | -1.93769200 |
| Br | 0.20844400  | -1.71907200 | 0.63619900  |
| H  | -3.05614800 | -4.57890300 | -1.57169800 |
| H  | -4.43339000 | -2.00670400 | -0.90185400 |
| C  | -0.97697900 | 3.80002900  | -0.47553300 |
| C  | -2.46027100 | 4.03613700  | -0.81828200 |
| C  | -0.83598900 | 3.01683100  | 0.82932800  |
| C  | -3.33834300 | 2.90006400  | -0.26197400 |
| C  | -1.36839900 | 1.59491700  | 0.63652700  |
| C  | -2.58376100 | 1.57379100  | -0.30834900 |
| H  | -0.52444400 | 3.22188000  | -1.29373900 |
| H  | -3.62444400 | 3.12001400  | 0.77319300  |
| H  | -1.42110000 | 3.49833800  | 1.62369200  |
| H  | -0.44270000 | 4.75467600  | -0.42368200 |
| H  | -2.77625600 | 4.97960200  | -0.34275500 |
| H  | 0.20195200  | 2.98555000  | 1.17421300  |
| H  | -4.26646900 | 2.84458100  | -0.84221100 |
| H  | -0.57386400 | 0.97119400  | 0.20246800  |

|   |             |            |             |
|---|-------------|------------|-------------|
| H | -3.23416200 | 0.73704800 | -0.03365100 |
| H | -2.24204400 | 1.40085900 | -1.33642400 |
| N | -2.60192700 | 4.07977800 | -2.27728200 |
| H | -3.53496900 | 4.38460500 | -2.53990800 |
| H | -1.94556700 | 4.74144100 | -2.68341300 |
| O | -1.68815300 | 1.08896700 | 1.93449300  |
| H | -2.05922100 | 0.19083400 | 1.84332400  |
| O | 0.76034700  | 1.01639600 | 3.10114700  |
| H | -0.16873200 | 1.01145000 | 2.77205500  |
| H | 0.74980900  | 1.47167900 | 3.94784900  |

**TS3<sub>f</sub>**

|    |             |             |             |
|----|-------------|-------------|-------------|
| C  | -2.62209500 | -1.33626700 | -0.27403700 |
| C  | -3.16514200 | -0.30209900 | 0.70577000  |
| C  | -3.78330400 | -2.10952100 | -0.92295400 |
| C  | -3.97478800 | 0.77774500  | -0.03292800 |
| C  | -5.03761900 | -1.24677000 | -1.12318500 |
| C  | -4.66083000 | 0.22299400  | -1.29625600 |
| H  | -2.02775100 | -0.82192300 | -1.04016100 |
| H  | -4.72033200 | 1.19613800  | 0.65212800  |
| H  | -4.07402900 | -2.96240800 | -0.30122300 |
| H  | -1.94846500 | -2.02240400 | 0.25015300  |
| H  | -3.83172900 | -0.82551700 | 1.40502700  |
| H  | -3.45978700 | -2.50844600 | -1.88936800 |
| H  | -3.30111300 | 1.59179300  | -0.32055600 |
| H  | -5.58592600 | -1.60198300 | -2.00639500 |
| H  | -5.54592100 | 0.82080300  | -1.54306400 |
| H  | -3.98586300 | 0.30195600  | -2.15707600 |
| N  | -2.08329400 | 0.26329100  | 1.53469400  |
| H  | -2.47467200 | 0.93469700  | 2.19481000  |
| H  | -1.24175200 | -0.60347200 | 2.09149800  |
| O  | -5.85354600 | -1.42646700 | 0.03699600  |
| H  | -6.66534100 | -0.91726700 | -0.06878300 |
| C  | 2.41681300  | 4.15576300  | -1.28771600 |
| C  | 3.19099300  | 3.59834900  | -0.09538700 |
| N  | 1.16650500  | 2.36618100  | -0.30316000 |
| H  | 2.92998800  | 4.02497800  | -2.24356700 |
| H  | 3.33459600  | 4.31719700  | 0.71599200  |
| C  | 2.29572700  | 2.47114500  | 0.40388600  |
| O  | 2.62858400  | 1.74399300  | 1.36685000  |
| C  | 1.12721500  | 3.32488500  | -1.30616900 |
| O  | 0.21019100  | 3.48348600  | -2.08268200 |
| Br | -0.66837100 | 1.27333200  | 0.56772100  |
| H  | 2.15365300  | 5.21193800  | -1.19631900 |
| H  | 4.17235400  | 3.18734400  | -0.34577900 |
| C  | 1.95294200  | -3.11334700 | -1.13075100 |
| C  | 3.28648100  | -3.67330100 | -0.59964200 |

|   |             |             |             |
|---|-------------|-------------|-------------|
| C | 1.25483200  | -2.26487700 | -0.06822700 |
| C | 3.92059400  | -2.70747900 | 0.42040400  |
| C | 2.08477100  | -1.01123300 | 0.21820800  |
| C | 3.58705200  | -1.26407200 | 0.05586600  |
| H | 2.16660700  | -2.49612300 | -2.01335000 |
| H | 3.54392300  | -2.92319200 | 1.42765300  |
| H | 1.15108800  | -2.84623300 | 0.85657500  |
| H | 1.30360700  | -3.93087900 | -1.46130400 |
| H | 3.07774900  | -4.62770200 | -0.08782400 |
| H | 0.24454700  | -1.97888000 | -0.37416300 |
| H | 5.00398100  | -2.86733600 | 0.44543000  |
| H | 1.76481500  | -0.19256000 | -0.43864600 |
| H | 4.13291200  | -0.54362000 | 0.67268300  |
| H | 3.87458400  | -1.08584300 | -0.98693300 |
| N | 4.20271900  | -3.84069900 | -1.73081400 |
| H | 5.04044400  | -4.34099700 | -1.44757700 |
| H | 3.76696500  | -4.37972500 | -2.47434700 |
| O | 1.82985600  | -0.58382600 | 1.58140800  |
| H | 2.06503300  | 0.44200700  | 1.60439200  |
| O | -0.33463800 | -1.26337000 | 2.39695300  |
| H | 0.78870700  | -0.87241500 | 1.98556300  |
| H | -0.34681400 | -1.52998100 | 3.32176500  |

### COM2g

|   |             |             |             |
|---|-------------|-------------|-------------|
| C | -2.63499800 | 1.12996700  | 0.69121100  |
| C | -2.62682000 | 0.95583000  | -0.83316800 |
| C | -3.74281400 | 0.27183100  | 1.30011500  |
| C | -2.90819500 | -0.50526800 | -1.24247100 |
| C | -3.45623800 | -1.22457000 | 1.11217300  |
| C | -2.56619100 | -1.47665500 | -0.11327700 |
| H | -1.65740400 | 0.83619300  | 1.09451400  |
| H | -3.96932700 | -0.61802100 | -1.49205800 |
| H | -4.69446800 | 0.48509900  | 0.79606000  |
| H | -2.76656200 | 2.18689700  | 0.94328800  |
| H | -3.42102000 | 1.59264500  | -1.25159400 |
| H | -3.88982500 | 0.49934500  | 2.35915800  |
| H | -2.33684900 | -0.74599200 | -2.14664900 |
| H | -2.94854200 | -1.61672600 | 2.00593000  |
| H | -2.68996000 | -2.51474700 | -0.44384200 |
| H | -1.51307600 | -1.36396000 | 0.16485300  |
| N | -1.32246700 | 1.39393000  | -1.35754400 |
| H | -1.33762300 | 1.47006000  | -2.37169600 |
| H | -1.05009400 | 2.29903500  | -0.96465400 |
| O | -4.72816300 | -1.85353100 | 0.97929800  |
| H | -4.60486800 | -2.80899700 | 0.95370300  |
| C | 4.38222900  | -0.25147300 | 1.11276800  |
| C | 4.24256700  | -1.63370800 | 0.46479900  |

|    |            |             |             |
|----|------------|-------------|-------------|
| N  | 2.35142000 | -0.33963700 | -0.06877800 |
| H  | 5.24420700 | 0.31757300  | 0.75676400  |
| H  | 4.23550800 | -2.45690400 | 1.18252100  |
| C  | 2.89455100 | -1.60608400 | -0.25074800 |
| O  | 2.38107500 | -2.50602000 | -0.86764000 |
| C  | 3.11611700 | 0.49294700  | 0.71565200  |
| O  | 2.81623700 | 1.62989200  | 1.02806600  |
| Br | 0.65746400 | 0.28426900  | -0.71762400 |
| H  | 4.43611200 | -0.28193100 | 2.20359200  |
| H  | 5.01684100 | -1.84797300 | -0.27556000 |
| O  | 0.28120500 | 3.18668800  | 0.41502800  |
| H  | 0.46039300 | 4.03056600  | 0.83989200  |
| H  | 1.06855000 | 2.63522000  | 0.56651800  |

### TS3<sub>g</sub>

|    |             |             |             |
|----|-------------|-------------|-------------|
| C  | -2.38411000 | 0.93238500  | 0.98094400  |
| C  | -2.44449400 | 1.03515200  | -0.54725500 |
| C  | -3.61686700 | 0.18580100  | 1.48974100  |
| C  | -2.98417500 | -0.26118400 | -1.19110200 |
| C  | -3.62320300 | -1.27877900 | 1.02647600  |
| C  | -2.81285000 | -1.46483700 | -0.26431400 |
| H  | -1.47048100 | 0.40411600  | 1.28114200  |
| H  | -4.05167200 | -0.13690100 | -1.40550600 |
| H  | -4.52403600 | 0.65508300  | 1.08760800  |
| H  | -2.32886900 | 1.93577500  | 1.41603000  |
| H  | -3.12385600 | 1.86047200  | -0.80381400 |
| H  | -3.69150900 | 0.24019200  | 2.57871200  |
| H  | -2.48264600 | -0.43204100 | -2.15044900 |
| H  | -3.18982900 | -1.91577200 | 1.81091600  |
| H  | -3.13840500 | -2.38371900 | -0.76531600 |
| H  | -1.75393100 | -1.60223500 | -0.02196000 |
| N  | -1.13243600 | 1.45841400  | -1.07699900 |
| H  | -1.20870600 | 1.69777100  | -2.06493600 |
| H  | -0.42137000 | 2.32718300  | -0.36305300 |
| O  | -4.99390900 | -1.61828400 | 0.84249600  |
| H  | -5.06573400 | -2.56309700 | 0.66613100  |
| C  | 4.34517200  | 0.16587600  | 1.21724700  |
| C  | 4.61677600  | -1.24793800 | 0.71173200  |
| N  | 2.49480600  | -0.49538700 | -0.12638800 |
| H  | 5.07084600  | 0.91162900  | 0.88232200  |
| H  | 4.73539000  | -1.99067400 | 1.50360600  |
| C  | 3.36176500  | -1.58569800 | -0.10533300 |
| O  | 3.15745800  | -2.64424800 | -0.65475800 |
| C  | 2.98957500  | 0.49265900  | 0.60724500  |
| O  | 2.46858900  | 1.62465500  | 0.83633500  |
| Br | 0.34827000  | 0.17874200  | -0.92548100 |
| H  | 4.27170900  | 0.24631700  | 2.30521500  |

|   |            |             |            |
|---|------------|-------------|------------|
| H | 5.48788500 | -1.32086700 | 0.05629200 |
| O | 0.47253100 | 2.83698900  | 0.20992200 |
| H | 0.25204700 | 3.45158900  | 0.91644200 |
| H | 1.38426800 | 2.18448300  | 0.46191800 |

**COM2<sub>h</sub>**

|    |             |             |             |
|----|-------------|-------------|-------------|
| C  | -2.82427300 | 0.87439000  | 0.12772800  |
| C  | -2.56208400 | 0.17148800  | -1.20944200 |
| C  | -3.84156500 | 0.06686000  | 0.93333000  |
| C  | -2.49960300 | -1.36266400 | -1.05090200 |
| C  | -3.27906700 | -1.30129600 | 1.34489100  |
| C  | -2.17176000 | -1.76291900 | 0.38767100  |
| H  | -1.88459800 | 0.97650800  | 0.68679800  |
| H  | -3.47104000 | -1.79447900 | -1.31738300 |
| H  | -4.73286100 | -0.12188900 | 0.32060500  |
| H  | -3.18303600 | 1.89193600  | -0.05563400 |
| H  | -3.39099700 | 0.41710300  | -1.88971600 |
| H  | -4.17745300 | 0.61905800  | 1.81491400  |
| H  | -1.76351000 | -1.77409900 | -1.75135900 |
| H  | -2.86525800 | -1.23877400 | 2.36206700  |
| H  | -2.05025400 | -2.84993400 | 0.46964000  |
| H  | -1.21825200 | -1.31670800 | 0.68817200  |
| N  | -1.31040500 | 0.68870300  | -1.79563200 |
| H  | -1.20906700 | 0.38299300  | -2.76095100 |
| H  | -1.29545000 | 1.71457300  | -1.76206700 |
| O  | -4.38622600 | -2.19973800 | 1.34086900  |
| H  | -4.10270000 | -3.05010000 | 1.69474000  |
| C  | 4.25084900  | -0.26402100 | 1.46575200  |
| C  | 4.51786600  | -1.30062900 | 0.37129400  |
| N  | 2.42755600  | -0.27370600 | -0.02408100 |
| H  | 4.97283800  | 0.55605300  | 1.48124600  |
| H  | 4.60312700  | -2.32242700 | 0.74818600  |
| C  | 3.29826800  | -1.22828000 | -0.54411400 |
| O  | 3.10495500  | -1.87742700 | -1.54184800 |
| C  | 2.88380300  | 0.31018000  | 1.12365800  |
| O  | 2.29778300  | 1.16328000  | 1.77231100  |
| Br | 0.68782100  | 0.15484600  | -0.82219300 |
| H  | 4.20772800  | -0.68394700 | 2.47338800  |
| H  | 5.40995600  | -1.09298400 | -0.22372500 |
| O  | -0.13322500 | 2.49671100  | 1.55228000  |
| H  | -0.13137900 | 2.97650700  | 2.38579800  |
| H  | 0.69432000  | 1.97510900  | 1.53473400  |
| O  | -1.09179400 | 3.40738300  | -0.86390600 |
| H  | -0.74280400 | 3.14850400  | 0.01476800  |
| H  | -0.52964800 | 4.12208000  | -1.17633900 |

**TS3<sub>h</sub>**

|    |             |             |             |
|----|-------------|-------------|-------------|
| C  | -2.64008600 | 0.91938900  | 0.54489600  |
| C  | -2.54178000 | 0.50060100  | -0.92719800 |
| C  | -3.73169900 | 0.09983200  | 1.23266900  |
| C  | -2.69001900 | -1.02889200 | -1.10288100 |
| C  | -3.37098900 | -1.39171900 | 1.29826700  |
| C  | -2.38067400 | -1.78007400 | 0.19269700  |
| H  | -1.67350300 | 0.76185200  | 1.04130700  |
| H  | -3.72103000 | -1.25716700 | -1.39687100 |
| H  | -4.66517000 | 0.17988300  | 0.66060500  |
| H  | -2.85397100 | 1.99070000  | 0.60815700  |
| H  | -3.36310800 | 0.99252200  | -1.46793900 |
| H  | -3.94355700 | 0.48389400  | 2.23395800  |
| H  | -2.04087100 | -1.37133900 | -1.91656200 |
| H  | -2.91893100 | -1.61919400 | 2.27484500  |
| H  | -2.42527600 | -2.86338900 | 0.02923900  |
| H  | -1.35911200 | -1.55620000 | 0.51596300  |
| N  | -1.31299100 | 1.05968600  | -1.52735100 |
| H  | -1.33105200 | 0.92170600  | -2.53684600 |
| H  | -1.04302300 | 2.32346600  | -1.09044100 |
| O  | -4.60350200 | -2.09656600 | 1.17361600  |
| H  | -4.44105800 | -3.03771900 | 1.30304500  |
| C  | 4.43560700  | -0.35834300 | 1.19332800  |
| C  | 4.45330200  | -1.66063500 | 0.39596800  |
| N  | 2.41932600  | -0.47460900 | -0.05956400 |
| H  | 5.22940800  | 0.34256300  | 0.92126100  |
| H  | 4.47577900  | -2.55788000 | 1.01887800  |
| C  | 3.12718300  | -1.63178000 | -0.37611700 |
| O  | 2.74952500  | -2.48664600 | -1.14438300 |
| C  | 3.09479200  | 0.25217400  | 0.81751700  |
| O  | 2.73102500  | 1.34893400  | 1.32244600  |
| Br | 0.37981800  | 0.23556600  | -0.91694800 |
| H  | 4.47493300  | -0.49299900 | 2.27728100  |
| H  | 5.27564600  | -1.73417000 | -0.31913800 |
| O  | 0.65164200  | 2.55753900  | 1.31238700  |
| H  | 0.75287700  | 3.22009200  | 2.00362400  |
| H  | 1.58209600  | 1.94044400  | 1.21777100  |
| O  | -0.70046500 | 3.26320500  | -0.54459800 |
| H  | 0.03537900  | 2.92364600  | 0.40687800  |
| H  | -0.24405200 | 3.85387300  | -1.15407700 |

**COM2i**

|   |             |             |             |
|---|-------------|-------------|-------------|
| C | -2.39625600 | 1.93137200  | -0.09426600 |
| C | -1.65106900 | 0.96713400  | -1.02891900 |
| C | -3.90493800 | 1.70653600  | -0.19132300 |
| C | -2.35243000 | -0.40545500 | -1.09239200 |
| C | -4.28973300 | 0.32069400  | 0.34332700  |
| C | -3.13143800 | -0.67501800 | 0.19166800  |



|    |             |             |             |
|----|-------------|-------------|-------------|
| H  | -2.05609900 | 1.75751800  | 0.93670900  |
| H  | -3.04867700 | -0.43032600 | -1.93888400 |
| H  | -4.21418500 | 1.74815100  | -1.24347200 |
| H  | -2.13388800 | 2.96639600  | -0.33694800 |
| H  | -1.66653700 | 1.40822300  | -2.03884900 |
| H  | -4.46455800 | 2.48572300  | 0.33338600  |
| H  | -1.60480200 | -1.18943800 | -1.25865900 |
| H  | -4.55772000 | 0.39963000  | 1.40835100  |
| H  | -3.51758100 | -1.70100900 | 0.21359300  |
| H  | -2.45630200 | -0.59410900 | 1.05074700  |
| N  | -0.27187600 | 0.80014400  | -0.54574000 |
| H  | 0.27745200  | 0.33982500  | -1.27107300 |
| H  | 0.15246000  | 1.71952100  | -0.41614300 |
| O  | -5.43648000 | -0.08449700 | -0.39932700 |
| H  | -5.73728300 | -0.93794500 | -0.06759200 |
| C  | 1.50791100  | 0.48236200  | 2.14972100  |
| C  | 0.28129400  | -0.39944300 | 2.40608600  |
| N  | 1.48827500  | -1.26669100 | 0.59124300  |
| H  | 2.22954800  | 0.48018600  | 2.97070400  |
| H  | -0.65830700 | 0.14976300  | 2.31741000  |
| C  | 0.29382900  | -1.44651100 | 1.31101700  |
| O  | -0.51850800 | -2.30153700 | 1.08334700  |
| C  | 2.17510200  | -0.10032100 | 0.92146000  |
| O  | 3.12745600  | 0.32927100  | 0.31572000  |
| Br | 1.76447100  | -2.11097100 | -0.99574100 |
| H  | 1.25485300  | 1.52040000  | 1.91864500  |
| H  | 0.29873200  | -0.90723900 | 3.37365500  |
| C  | 2.69851700  | 3.21505400  | -0.30572500 |
| N  | 1.62584800  | 3.33562600  | 0.10896400  |
| C  | 4.05385100  | 3.06435200  | -0.82938000 |
| H  | 4.08493600  | 3.39077100  | -1.87025700 |
| H  | 4.74342800  | 3.67158400  | -0.24052800 |
| H  | 4.33472200  | 2.01236700  | -0.75668400 |

**TS3<sub>i</sub>**

|   |             |             |             |
|---|-------------|-------------|-------------|
| C | -2.66809500 | 0.95567000  | 0.74889000  |
| C | -2.61391500 | 0.73288300  | -0.76607400 |
| C | -3.84534700 | 0.17112600  | 1.32825400  |
| C | -2.91426000 | -0.73290200 | -1.15116500 |
| C | -3.64834800 | -1.34562000 | 1.18124300  |
| C | -2.69558700 | -1.68313400 | 0.02614600  |
| H | -1.72903700 | 0.62125000  | 1.20734300  |
| H | -3.96024100 | -0.80863900 | -1.46898200 |
| H | -4.76315400 | 0.43131100  | 0.78538000  |
| H | -2.75980000 | 2.02464200  | 0.96218200  |
| H | -3.37075700 | 1.38166600  | -1.22864500 |
| H | -4.01597900 | 0.43304000  | 2.37538900  |

|    |             |             |             |
|----|-------------|-------------|-------------|
| H  | -2.29716400 | -1.02631600 | -2.00788600 |
| H  | -3.23396000 | -1.75605300 | 2.11326900  |
| H  | -2.85751000 | -2.72129000 | -0.28601100 |
| H  | -1.65716600 | -1.62232900 | 0.36818500  |
| N  | -1.33623800 | 1.24602500  | -1.31010200 |
| H  | -1.36050400 | 1.23937100  | -2.32975900 |
| H  | -0.95738500 | 2.40794700  | -0.79920400 |
| O  | -4.94866500 | -1.88530600 | 0.96304600  |
| H  | -4.89656800 | -2.84766900 | 0.97299100  |
| C  | 4.61356500  | -1.03485700 | 0.78690300  |
| C  | 4.10982200  | -2.38492400 | 0.28210900  |
| N  | 2.40002400  | -0.71180200 | -0.03387100 |
| H  | 5.48157800  | -0.64743800 | 0.24689500  |
| H  | 4.05854100  | -3.15483600 | 1.05507200  |
| C  | 2.68971900  | -2.07686400 | -0.20679800 |
| O  | 1.91783400  | -2.87893400 | -0.67288300 |
| C  | 3.42551100  | -0.13316400 | 0.52460200  |
| O  | 3.52947200  | 1.10679800  | 0.86065600  |
| Br | 0.24905500  | 0.25349000  | -0.81627600 |
| H  | 4.85420100  | -1.01335100 | 1.85298400  |
| H  | 4.68899100  | -2.78922000 | -0.55111400 |
| C  | 0.66687400  | 3.31284400  | 0.31107000  |
| N  | -0.39701200 | 3.33729200  | -0.20855700 |
| C  | 1.90381800  | 3.25176800  | 0.90287700  |
| H  | 2.66232000  | 3.87000100  | 0.42839700  |
| H  | 1.88692400  | 3.29642700  | 1.98926300  |
| H  | 2.71064300  | 1.77132700  | 0.73673100  |

**COM2'a**

|   |             |             |             |
|---|-------------|-------------|-------------|
| C | -3.46266500 | -4.06334900 | 0.72660800  |
| C | -4.29371700 | -3.10444200 | -0.12010600 |
| C | -2.02085900 | -3.55013000 | 0.86518000  |
| C | -4.44118600 | -1.75847200 | 0.61194700  |
| C | -1.94493200 | -2.01792900 | 0.96980900  |
| C | -3.24492200 | -1.44862900 | 1.53018400  |
| H | -3.94540700 | -4.15975600 | 1.70759000  |
| H | -4.56760000 | -0.96002500 | -0.12798800 |
| H | -1.42440600 | -3.85198900 | -0.00225000 |
| H | -3.46270400 | -5.06407100 | 0.27866500  |
| H | -3.74249700 | -2.92360000 | -1.05627000 |
| H | -1.55054400 | -3.99755700 | 1.74711400  |
| H | -5.35863100 | -1.79972200 | 1.21098100  |
| H | -1.10635800 | -1.73230700 | 1.62338400  |
| H | -3.13949900 | -0.36912300 | 1.68740300  |
| H | -3.40283500 | -1.89454100 | 2.52008000  |
| N | -5.62463400 | -3.67238900 | -0.35474700 |
| H | -6.20967100 | -3.00751300 | -0.85456300 |

|    |             |             |             |
|----|-------------|-------------|-------------|
| H  | -5.55691900 | -4.50162700 | -0.93890900 |
| O  | -1.69623300 | -1.49110100 | -0.33875200 |
| H  | -1.61169200 | -0.51973900 | -0.23340700 |
| C  | 4.78566100  | -2.92765800 | -1.21532400 |
| C  | 4.77898700  | -2.54401000 | 0.26882300  |
| N  | 2.62379500  | -2.23397900 | -0.60752900 |
| H  | 5.05566800  | -3.97034500 | -1.39659900 |
| H  | 5.42514200  | -1.69465100 | 0.50398300  |
| C  | 3.34761100  | -2.13756100 | 0.56588900  |
| O  | 2.90244100  | -1.76742900 | 1.63139400  |
| C  | 3.35747400  | -2.71775200 | -1.69956800 |
| O  | 2.91364600  | -2.91809400 | -2.79754900 |
| Br | 0.79342200  | -1.90316700 | -0.65049000 |
| H  | 5.44624800  | -2.30512800 | -1.82284500 |
| H  | 5.05174600  | -3.36353100 | 0.93751400  |
| C  | -3.89893400 | 3.21572100  | -0.67913000 |
| C  | -2.92582900 | 3.99838800  | -1.57954300 |
| C  | -3.28169700 | 1.90201000  | -0.19918800 |
| C  | -1.46566000 | 3.75906900  | -1.14656000 |
| C  | -2.03725400 | 2.14267600  | 0.67535600  |
| C  | -1.40378600 | 3.50296400  | 0.35555000  |
| H  | -4.14898600 | 3.84523300  | 0.18456400  |
| H  | -1.05311200 | 2.89059100  | -1.67510300 |
| H  | -2.96636100 | 1.30856600  | -1.06797000 |
| H  | -4.83567400 | 3.02412800  | -1.21363300 |
| H  | -3.04496800 | 3.63276100  | -2.61278700 |
| H  | -4.01996000 | 1.30171700  | 0.34104100  |
| H  | -0.85739300 | 4.62637100  | -1.42839300 |
| H  | -2.31088700 | 2.10691700  | 1.74003700  |
| H  | -0.37499600 | 3.51894600  | 0.72659400  |
| H  | -1.94397600 | 4.30015400  | 0.88013600  |
| N  | -3.23243000 | 5.42695900  | -1.45905600 |
| H  | -2.70704100 | 5.96694700  | -2.14095100 |
| H  | -4.21834000 | 5.59970200  | -1.63731200 |
| O  | -1.13622100 | 1.07428400  | 0.38921700  |
| H  | -0.37593200 | 1.03564100  | 1.00512400  |
| C  | 2.88712100  | 3.76327400  | 1.47817000  |
| C  | 2.51319000  | 3.78020400  | -0.01584100 |
| C  | 2.08063000  | 2.71803700  | 2.24871600  |
| C  | 2.12015400  | 2.37474300  | -0.50722900 |
| C  | 2.38180000  | 1.29780400  | 1.75062600  |
| C  | 2.86040200  | 1.30660900  | 0.29046300  |
| H  | 3.95788500  | 3.53307200  | 1.55779400  |
| H  | 1.04066300  | 2.21334200  | -0.40108400 |
| H  | 1.00819800  | 2.90092100  | 2.10889700  |
| H  | 2.74349900  | 4.75807300  | 1.91388400  |
| H  | 1.64460600  | 4.44871300  | -0.14556300 |

|   |            |             |             |
|---|------------|-------------|-------------|
| H | 2.26449900 | 2.78835200  | 3.32451000  |
| H | 2.34197100 | 2.29053400  | -1.57712100 |
| H | 3.15324700 | 0.83460400  | 2.37963600  |
| H | 2.70202200 | 0.31652900  | -0.14656200 |
| H | 3.93815200 | 1.51316600  | 0.25640900  |
| N | 3.67957000 | 4.24272700  | -0.77595100 |
| H | 3.43536400 | 4.39455100  | -1.75072600 |
| H | 4.01749500 | 5.12981900  | -0.41140800 |
| O | 1.17430700 | 0.54586400  | 1.90204800  |
| H | 1.40305600 | -0.39413300 | 1.81437900  |

**TS3'<sub>a</sub>**

|    |             |             |             |
|----|-------------|-------------|-------------|
| C  | -1.87236900 | 4.40527200  | 1.54658200  |
| C  | -3.16673400 | 3.65037600  | 1.89958700  |
| C  | -0.76007900 | 3.44018800  | 1.13573700  |
| C  | -3.29388700 | 2.35886200  | 1.06693100  |
| C  | -1.13091000 | 2.69565000  | -0.16048400 |
| C  | -2.65333500 | 2.55786500  | -0.30364100 |
| H  | -2.09116800 | 5.08822600  | 0.71474100  |
| H  | -2.79119700 | 1.53291800  | 1.58518700  |
| H  | -0.61219300 | 2.68321200  | 1.91709600  |
| H  | -1.55661300 | 5.02566900  | 2.39228700  |
| H  | -3.12148700 | 3.36991500  | 2.96487200  |
| H  | 0.19414700  | 3.96152500  | 1.01901400  |
| H  | -4.35240600 | 2.08727700  | 0.97694100  |
| H  | -0.72687600 | 3.23229200  | -1.03282700 |
| H  | -2.86724100 | 1.72564800  | -0.98427800 |
| H  | -3.06980700 | 3.46320300  | -0.76100300 |
| N  | -4.30956600 | 4.52156600  | 1.60648000  |
| H  | -5.16983100 | 4.12695900  | 1.97630400  |
| H  | -4.18699100 | 5.43283100  | 2.04022400  |
| O  | -0.59745600 | 1.37935000  | -0.13988000 |
| H  | -0.81127900 | 0.04982000  | -1.17730400 |
| C  | 5.81858200  | 1.61392100  | -0.94730300 |
| C  | 5.51377700  | 0.30231800  | -1.66762600 |
| N  | 3.51955300  | 1.02352800  | -0.60372500 |
| H  | 6.16817100  | 2.41414400  | -1.60265200 |
| H  | 6.11248700  | -0.54941300 | -1.33616600 |
| C  | 4.05814000  | 0.05325000  | -1.32215300 |
| O  | 3.48714700  | -1.00504500 | -1.71831700 |
| C  | 4.47139000  | 2.02018200  | -0.34303300 |
| O  | 4.24914000  | 3.03608900  | 0.26733800  |
| Br | 1.32979100  | 1.30934500  | -0.27977200 |
| H  | 6.54469400  | 1.50665200  | -0.13790800 |
| H  | 5.60556100  | 0.36382600  | -2.75566600 |
| C  | -4.11229800 | -1.80763600 | -2.92657100 |
| C  | -4.74545400 | -2.16724700 | -1.56631500 |

|   |             |             |             |
|---|-------------|-------------|-------------|
| C | -2.78058900 | -1.05103500 | -2.78616200 |
| C | -4.29575400 | -1.16566600 | -0.50097500 |
| C | -1.99369600 | -1.51448300 | -1.56562100 |
| C | -2.77762600 | -1.24534700 | -0.26636500 |
| H | -3.95668300 | -2.73325000 | -3.49418000 |
| H | -4.57985800 | -0.15811100 | -0.83136500 |
| H | -2.96765000 | 0.02662600  | -2.68045400 |
| H | -4.81315400 | -1.19846500 | -3.50667800 |
| H | -5.84104400 | -2.11458900 | -1.66287100 |
| H | -2.16443800 | -1.17503400 | -3.68132600 |
| H | -4.83043000 | -1.34134300 | 0.44032800  |
| H | -1.78584500 | -2.58565900 | -1.65703200 |
| H | -2.42641700 | -0.29976900 | 0.16366200  |
| H | -2.54953800 | -2.03160500 | 0.45847500  |
| N | -4.29396000 | -3.50671700 | -1.16525900 |
| H | -4.69198100 | -3.76433300 | -0.26563900 |
| H | -4.60396500 | -4.20307800 | -1.83708800 |
| O | -0.71848400 | -0.86433400 | -1.54376500 |
| H | 0.56504600  | -1.48697900 | -1.07589500 |
| C | 2.11933200  | -3.74841300 | 2.33458600  |
| C | 0.62021500  | -3.97727100 | 2.60415300  |
| C | 2.35371300  | -3.35814300 | 0.87567900  |
| C | -0.24794800 | -3.07677200 | 1.70217600  |
| C | 1.72964500  | -1.98681100 | 0.59398000  |
| C | 0.46543500  | -1.75535100 | 1.42864000  |
| H | 2.46792700  | -2.94194400 | 2.99337600  |
| H | -0.46526100 | -3.58639500 | 0.75407400  |
| H | 1.87819800  | -4.09247700 | 0.21414100  |
| H | 2.69222800  | -4.64448700 | 2.59494500  |
| H | 0.38609600  | -5.02885900 | 2.36973700  |
| H | 3.41849800  | -3.34765600 | 0.62378000  |
| H | -1.21099800 | -2.90228500 | 2.19478400  |
| H | 2.45235300  | -1.19023500 | 0.81451500  |
| H | -0.18167300 | -1.02147800 | 0.93868900  |
| H | 0.76268200  | -1.31182200 | 2.38569600  |
| N | 0.34606900  | -3.64711500 | 4.00531600  |
| H | -0.59582600 | -3.92518000 | 4.26568700  |
| H | 0.98622800  | -4.13691700 | 4.62467300  |
| O | 1.46572000  | -1.91687500 | -0.82992400 |
| H | 2.40433300  | -1.38106000 | -1.32497400 |

**COM2'c**

|   |             |             |             |
|---|-------------|-------------|-------------|
| C | -2.81714700 | -3.71832900 | -0.30487800 |
| C | -3.62873500 | -2.44287700 | -0.55604100 |
| C | -1.38630300 | -3.39793900 | 0.17777600  |
| C | -3.80568500 | -1.65679600 | 0.76252700  |
| C | -1.30220500 | -2.11609300 | 1.02737900  |

|    |             |             |             |
|----|-------------|-------------|-------------|
| C  | -2.62472800 | -1.83656300 | 1.74522600  |
| H  | -3.35300400 | -4.32196100 | 0.43834300  |
| H  | -3.94849600 | -0.59446100 | 0.53347500  |
| H  | -0.70560700 | -3.26682500 | -0.67028200 |
| H  | -2.77353100 | -4.32565700 | -1.21738100 |
| H  | -3.04689300 | -1.81321700 | -1.24875200 |
| H  | -0.99943800 | -4.24111400 | 0.76045200  |
| H  | -4.72866600 | -2.00697300 | 1.23863900  |
| H  | -0.49389700 | -2.21765000 | 1.76509500  |
| H  | -2.52028300 | -0.95680900 | 2.39032900  |
| H  | -2.81934700 | -2.68523900 | 2.41313300  |
| N  | -4.95495100 | -2.79529200 | -1.08867100 |
| H  | -5.49713900 | -1.94454400 | -1.23255400 |
| H  | -4.84727200 | -3.21092300 | -2.01276200 |
| O  | -0.97234900 | -1.02476100 | 0.14085500  |
| H  | -0.84619000 | -0.20809600 | 0.68118000  |
| C  | 5.67777400  | -0.26635000 | -0.42271900 |
| C  | 5.21892000  | 0.84739300  | 0.53564900  |
| N  | 3.34649400  | -0.38700300 | -0.15757100 |
| H  | 6.37300200  | -0.97562500 | 0.03445000  |
| H  | 5.43932200  | 1.85528200  | 0.17299000  |
| C  | 3.70580500  | 0.68838500  | 0.64123600  |
| O  | 2.93885800  | 1.36974000  | 1.29743200  |
| C  | 4.40691100  | -1.02032200 | -0.81995100 |
| O  | 4.30899200  | -1.97247700 | -1.55481600 |
| Br | 1.51624700  | -0.88751000 | -0.26290200 |
| H  | 6.15406300  | 0.11125200  | -1.33163400 |
| H  | 5.64866200  | 0.76572800  | 1.53800300  |
| C  | -2.61763400 | 3.84886100  | 0.47456400  |
| C  | -2.71224200 | 3.31187000  | -0.97357700 |
| C  | -1.97687800 | 2.82720800  | 1.42092400  |
| C  | -1.57818300 | 2.30182700  | -1.26827500 |
| C  | -0.51473300 | 2.55801800  | 1.03262100  |
| C  | -0.30332400 | 2.65671600  | -0.49677800 |
| H  | -2.00897200 | 4.76226500  | 0.45728600  |
| H  | -1.90054700 | 1.28977800  | -0.99757700 |
| H  | -2.52457600 | 1.87759100  | 1.36455100  |
| H  | -3.61019300 | 4.14018800  | 0.83712500  |
| H  | -3.67358700 | 2.77658800  | -1.07561700 |
| H  | -2.03557500 | 3.15595500  | 2.46324200  |
| H  | -1.38123100 | 2.28160700  | -2.34664300 |
| H  | 0.13487000  | 3.29286500  | 1.52755900  |
| H  | 0.52384600  | 1.99996100  | -0.78319800 |
| H  | -0.00919600 | 3.68006700  | -0.75686900 |
| N  | -2.60418600 | 4.44952600  | -1.90140600 |
| H  | -2.81086600 | 4.13956200  | -2.84925100 |
| H  | -3.31107400 | 5.14678100  | -1.67367900 |

|   |             |            |            |
|---|-------------|------------|------------|
| O | -0.18110600 | 1.25510400 | 1.54977200 |
| H | 0.78682300  | 1.15495200 | 1.49540300 |

**TS3'e**

|    |             |             |             |
|----|-------------|-------------|-------------|
| C  | -2.82403500 | -3.52032100 | -0.30089200 |
| C  | -3.50852900 | -2.18224800 | -0.59700400 |
| C  | -1.40092500 | -3.31854700 | 0.26219100  |
| C  | -3.69840600 | -1.38465300 | 0.71186700  |
| C  | -1.24999800 | -2.03284100 | 1.10937700  |
| C  | -2.58831200 | -1.65387600 | 1.75430800  |
| H  | -3.45120900 | -4.07365000 | 0.40959200  |
| H  | -3.74926800 | -0.31447400 | 0.47855500  |
| H  | -0.66673700 | -3.26344700 | -0.54847200 |
| H  | -2.78162500 | -4.13222200 | -1.21064500 |
| H  | -2.83257400 | -1.60473200 | -1.24869900 |
| H  | -1.12357500 | -4.18688100 | 0.87133000  |
| H  | -4.67005600 | -1.66436800 | 1.13532000  |
| H  | -0.50240900 | -2.20817400 | 1.89824900  |
| H  | -2.45492700 | -0.78756800 | 2.41192800  |
| H  | -2.88300200 | -2.48923700 | 2.40217700  |
| N  | -4.82440200 | -2.42058300 | -1.21289200 |
| H  | -5.27553400 | -1.52651800 | -1.40185600 |
| H  | -4.69454400 | -2.85929300 | -2.12340300 |
| O  | -0.82497400 | -0.92470700 | 0.30742600  |
| H  | -0.23251300 | 0.44626200  | 1.11035800  |
| C  | 5.61560000  | -0.12771700 | -0.40568500 |
| C  | 4.99381500  | 0.95617500  | 0.48414400  |
| N  | 3.25786700  | -0.47440700 | -0.25374400 |
| H  | 6.34862300  | -0.75235400 | 0.11192000  |
| H  | 5.12044500  | 1.97374300  | 0.10209500  |
| C  | 3.51384500  | 0.60516100  | 0.48783700  |
| O  | 2.68522100  | 1.30597700  | 1.14024000  |
| C  | 4.42515600  | -1.00439500 | -0.82985000 |
| O  | 4.46888200  | -1.98317000 | -1.53697700 |
| Br | 1.15386600  | -1.03254500 | -0.20174200 |
| H  | 6.10217900  | 0.26658600  | -1.30189400 |
| H  | 5.36398200  | 0.95415400  | 1.51391100  |
| C  | -2.45988300 | 3.64851600  | 0.54133500  |
| C  | -2.61789500 | 3.11590200  | -0.90489500 |
| C  | -1.69620600 | 2.66393400  | 1.43642100  |
| C  | -1.47085900 | 2.14640700  | -1.27279200 |
| C  | -0.25526500 | 2.50038100  | 0.93507300  |
| C  | -0.15824000 | 2.56396900  | -0.60331200 |
| H  | -1.91193200 | 4.59843100  | 0.49392700  |
| H  | -1.72403400 | 1.12373600  | -0.97307500 |
| H  | -2.19199000 | 1.68578900  | 1.40656400  |
| H  | -3.44006100 | 3.87262000  | 0.97611500  |

|   |             |            |             |
|---|-------------|------------|-------------|
| H | -3.56509200 | 2.55018500 | -0.95840900 |
| H | -1.69782900 | 2.98594800 | 2.48208800  |
| H | -1.34701200 | 2.12679600 | -2.36156600 |
| H | 0.39230900  | 3.26085300 | 1.37994800  |
| H | 0.67252700  | 1.93871500 | -0.94081900 |
| H | 0.07223800  | 3.59506100 | -0.89309900 |
| N | -2.59602100 | 4.26430400 | -1.82450400 |
| H | -2.83153900 | 3.95507500 | -2.76572000 |
| H | -3.31745400 | 4.93285300 | -1.55967000 |
| O | 0.27991400  | 1.24495800 | 1.47602200  |
| H | 1.43366500  | 1.15041900 | 1.25980000  |

**COM2'd**

|    |             |             |             |
|----|-------------|-------------|-------------|
| C  | -2.22379100 | -3.31066800 | 1.32699600  |
| C  | -3.67352900 | -2.85606000 | 1.01554800  |
| C  | -1.22105900 | -3.00659800 | 0.19049300  |
| C  | -3.92036000 | -2.87554400 | -0.49964100 |
| C  | -1.61468200 | -1.73442600 | -0.55286700 |
| C  | -2.96541600 | -1.93185200 | -1.27053900 |
| H  | -1.89732100 | -2.82004700 | 2.25226400  |
| H  | -3.78490500 | -3.90805400 | -0.84296000 |
| H  | -1.19092200 | -3.83544000 | -0.52833600 |
| H  | -2.22097100 | -4.38658800 | 1.53320900  |
| H  | -4.36649900 | -3.57617700 | 1.48408000  |
| H  | -0.20814200 | -2.90157700 | 0.59003300  |
| H  | -4.96587900 | -2.62158100 | -0.71579200 |
| H  | -1.71113400 | -0.92493300 | 0.17998100  |
| H  | -2.75146400 | -2.35227500 | -2.25951200 |
| H  | -3.43698800 | -0.95775100 | -1.43529600 |
| N  | -3.88609600 | -1.48600200 | 1.52444000  |
| H  | -4.84886000 | -1.20407200 | 1.34745000  |
| H  | -3.77163400 | -1.47898900 | 2.53599900  |
| O  | -0.59447800 | -1.39614900 | -1.50478500 |
| H  | -0.67057600 | -0.41929000 | -1.70698400 |
| C  | 5.45443300  | -0.10233100 | 1.04890200  |
| C  | 5.08074700  | 1.24429800  | 0.40681500  |
| N  | 3.34130800  | -0.29266600 | 0.03474300  |
| H  | 5.59815200  | -0.04436300 | 2.13140900  |
| H  | 5.76945100  | 1.55793400  | -0.38280200 |
| C  | 3.69955200  | 1.02799900  | -0.21013500 |
| O  | 3.02811400  | 1.84704700  | -0.80559800 |
| C  | 4.27304300  | -1.03388700 | 0.76625200  |
| O  | 4.15131700  | -2.18831000 | 1.10326100  |
| Br | 1.65366000  | -0.96185000 | -0.56792200 |
| H  | 6.35850000  | -0.55117600 | 0.62818600  |
| H  | 5.01689800  | 2.06836100  | 1.12291900  |
| C  | -0.59249900 | 2.08708000  | 0.49297400  |



|   |             |            |             |
|---|-------------|------------|-------------|
| C | -1.07977500 | 2.33465600 | -0.95525100 |
| C | -1.67889300 | 2.38692000 | 1.54933000  |
| C | -2.60203100 | 2.18709800 | -1.05149400 |
| C | -2.56396200 | 3.55971700 | 1.13094600  |
| C | -3.33089200 | 3.22457800 | -0.17228300 |
| H | -0.26615600 | 1.04615100 | 0.58707200  |
| H | -2.92960300 | 2.28029100 | -2.09466500 |
| H | -1.21416600 | 2.60385400 | 2.51641200  |
| H | 0.28967500  | 2.70633600 | 0.67688100  |
| H | -0.82702600 | 3.37165400 | -1.21992200 |
| H | -2.32187800 | 1.50953600 | 1.69181800  |
| H | -2.87306100 | 1.17465700 | -0.73006900 |
| H | -3.29008900 | 3.77701300 | 1.93022900  |
| H | -3.48603700 | 4.15774500 | -0.73010300 |
| H | -4.32964100 | 2.84808000 | 0.07827700  |
| N | -0.41612000 | 1.38277600 | -1.87657000 |
| H | -0.58399900 | 1.67108900 | -2.83969100 |
| H | 0.59460700  | 1.43422600 | -1.73521200 |
| O | -1.69092500 | 4.68367000 | 0.96377700  |
| H | -2.22962200 | 5.43543000 | 0.68459300  |

### TS3'a

|   |             |             |             |
|---|-------------|-------------|-------------|
| C | -3.26971000 | -2.54028300 | 1.41465800  |
| C | -4.49118600 | -1.65490900 | 1.05408200  |
| C | -2.22518300 | -2.63887600 | 0.27988700  |
| C | -4.70930900 | -1.64520800 | -0.46568100 |
| C | -2.16156800 | -1.33589800 | -0.51685400 |
| C | -3.49794600 | -1.06987400 | -1.23688900 |
| H | -2.80137200 | -2.13520300 | 2.32040300  |
| H | -4.90122300 | -2.67734300 | -0.78206900 |
| H | -2.48172100 | -3.45202200 | -0.41084800 |
| H | -3.61791500 | -3.54610500 | 1.67408000  |
| H | -5.38683100 | -2.09585500 | 1.52499300  |
| H | -1.23740700 | -2.87411100 | 0.68823400  |
| H | -5.61675900 | -1.08038600 | -0.71488600 |
| H | -1.95744100 | -0.51165100 | 0.17767400  |
| H | -3.44196600 | -1.53204500 | -2.22896200 |
| H | -3.61230200 | 0.00672300  | -1.39263700 |
| N | -4.25810400 | -0.27173700 | 1.51641000  |
| H | -5.08227900 | 0.29427800  | 1.32064300  |
| H | -4.14796200 | -0.26810400 | 2.52851700  |
| O | -1.17379100 | -1.35552400 | -1.55111100 |
| H | 1.21755100  | 0.91990900  | -1.64387500 |
| C | 4.88042500  | -1.85043000 | 1.16121600  |
| C | 5.15502500  | -0.38824200 | 0.80576400  |
| N | 2.96145200  | -0.92333900 | 0.02346800  |
| H | 4.90925600  | -2.05851900 | 2.23424000  |

|    |             |             |             |
|----|-------------|-------------|-------------|
| H  | 6.00055200  | -0.24028700 | 0.12668000  |
| C  | 3.86920200  | 0.03343400  | 0.10830700  |
| O  | 3.76354400  | 1.23530000  | -0.32332500 |
| C  | 3.45205500  | -2.09010100 | 0.63726800  |
| O  | 2.83574000  | -3.12865400 | 0.73912400  |
| Br | 0.60823500  | -1.25130800 | -0.84123900 |
| H  | 5.56095800  | -2.55654100 | 0.67720100  |
| H  | 5.32535700  | 0.25988500  | 1.67128200  |
| C  | 0.68553500  | 2.22137700  | 0.80807500  |
| C  | 0.64576300  | 2.65217500  | -0.66315900 |
| C  | -0.20897200 | 3.13308800  | 1.68091200  |
| C  | -0.78317700 | 2.52418000  | -1.23809700 |
| C  | -1.37150800 | 3.78025700  | 0.90979200  |
| C  | -1.88282900 | 2.85267900  | -0.19547700 |
| H  | 0.36569500  | 1.17489500  | 0.86909200  |
| H  | -0.87694400 | 3.17750500  | -2.11303400 |
| H  | 0.37894700  | 3.94691200  | 2.11704400  |
| H  | 1.71698100  | 2.25109700  | 1.17179100  |
| H  | 0.97012900  | 3.69436200  | -0.72571200 |
| H  | -0.61450800 | 2.55012200  | 2.51424000  |
| H  | -0.93111400 | 1.49687300  | -1.59171500 |
| H  | -2.18926000 | 3.99969400  | 1.61330200  |
| H  | -2.75078100 | 3.30352800  | -0.69371200 |
| H  | -2.25249000 | 1.93333300  | 0.27497300  |
| N  | 1.61927600  | 1.84830900  | -1.46549300 |
| H  | 1.78669700  | 2.28734300  | -2.37000200 |
| H  | 2.74620300  | 1.53576700  | -0.85699200 |
| O  | -0.87069300 | 5.01190700  | 0.36418800  |
| H  | -1.58274300 | 5.41466400  | -0.15112000 |

**COM2'e**

|   |             |             |             |
|---|-------------|-------------|-------------|
| C | -4.35322300 | -0.13750200 | -1.63783100 |
| C | -5.08497100 | -0.21065300 | -0.30083900 |
| C | -2.84198300 | 0.04545500  | -1.42442800 |
| C | -4.64921000 | -1.47370900 | 0.46323600  |
| C | -2.32828000 | -0.69061900 | -0.17823800 |
| C | -3.20321800 | -1.89781700 | 0.14237700  |
| H | -4.56542000 | -1.06240100 | -2.18982600 |
| H | -4.75973600 | -1.30266000 | 1.53989400  |
| H | -2.59371000 | 1.10625300  | -1.31103400 |
| H | -4.74918000 | 0.68585900  | -2.24363900 |
| H | -4.78662200 | 0.66788200  | 0.29197800  |
| H | -2.29816200 | -0.31288800 | -2.30503700 |
| H | -5.33504900 | -2.28404600 | 0.18923700  |
| H | -1.29045300 | -1.01789100 | -0.34701700 |
| H | -2.76527600 | -2.45918200 | 0.97439500  |
| H | -3.18803100 | -2.55819000 | -0.73416500 |

|    |             |             |             |
|----|-------------|-------------|-------------|
| N  | -6.53239700 | -0.26371800 | -0.52991400 |
| H  | -7.02430600 | -0.38456200 | 0.35190300  |
| H  | -6.85851500 | 0.61192500  | -0.93055700 |
| O  | -2.33232300 | 0.23177300  | 0.91834800  |
| H  | -1.99291700 | -0.25772500 | 1.69548800  |
| C  | 2.71269200  | 4.09466900  | -1.07191500 |
| C  | 3.50103400  | 3.31536700  | -0.01350200 |
| N  | 1.26869200  | 2.59681200  | 0.02931400  |
| H  | 3.08409700  | 3.95016400  | -2.08865600 |
| H  | 3.92369100  | 3.94552400  | 0.77250200  |
| C  | 2.49333400  | 2.37360700  | 0.62180500  |
| O  | 2.71878600  | 1.55749900  | 1.49174300  |
| C  | 1.29356000  | 3.55225600  | -0.99775100 |
| O  | 0.34805300  | 3.86521000  | -1.66930000 |
| Br | -0.28028800 | 1.66703700  | 0.48405900  |
| H  | 2.67469600  | 5.16983400  | -0.88310400 |
| H  | 4.31379300  | 2.71303400  | -0.42654700 |
| C  | 1.67934500  | -3.58050900 | -0.95027300 |
| C  | 3.18010300  | -3.86674200 | -0.75027800 |
| C  | 1.09936800  | -2.84123200 | 0.25463200  |
| C  | 3.83223700  | -2.78369100 | 0.12993400  |
| C  | 1.71457500  | -1.44234300 | 0.35942100  |
| C  | 3.17348000  | -1.43192100 | -0.12796200 |
| H  | 1.56544600  | -2.95888300 | -1.84899400 |
| H  | 3.72335300  | -3.04290100 | 1.18963900  |
| H  | 1.33859200  | -3.38548000 | 1.17745600  |
| H  | 1.13667000  | -4.51325800 | -1.13599000 |
| H  | 3.27868900  | -4.83608700 | -0.23420300 |
| H  | 0.00769000  | -2.77589300 | 0.20564900  |
| H  | 4.90692600  | -2.74590500 | -0.08053700 |
| H  | 1.12658500  | -0.73641100 | -0.24625300 |
| H  | 3.70789800  | -0.61741400 | 0.37275100  |
| H  | 3.19896700  | -1.22924900 | -1.20584400 |
| N  | 3.83254900  | -3.87161100 | -2.06326500 |
| H  | 4.78792600  | -4.20996000 | -1.99114500 |
| H  | 3.34398400  | -4.48855400 | -2.70678300 |
| O  | 1.62238100  | -1.05343700 | 1.73268400  |
| H  | 1.93374600  | -0.13511300 | 1.81981600  |
| O  | -0.91057600 | -1.39221000 | 2.57528500  |
| H  | 0.03770200  | -1.25887000 | 2.33860400  |
| H  | -0.93851700 | -1.67199900 | 3.49457600  |

**TS3'e**

|   |             |             |             |
|---|-------------|-------------|-------------|
| C | -2.95347700 | -3.34022900 | -0.63369400 |
| C | -3.63438200 | -1.98186300 | -0.82503600 |
| C | -1.58582400 | -3.19523500 | 0.06692700  |
| C | -3.95886300 | -1.36172500 | 0.54957400  |

|   |             |             |             |
|---|-------------|-------------|-------------|
| C | -1.52669800 | -2.01347100 | 1.06454600  |
| C | -2.91666500 | -1.71267400 | 1.63881500  |
| H | -3.62803700 | -3.97864500 | -0.04894400 |
| H | -4.04972700 | -0.27425600 | 0.44598800  |
| H | -0.78868500 | -3.04395300 | -0.66766000 |
| H | -2.82380600 | -3.83865500 | -1.60234800 |
| H | -2.91342900 | -1.31939600 | -1.33163600 |
| H | -1.34662100 | -4.12573900 | 0.59523400  |
| H | -4.94372800 | -1.73223700 | 0.85728500  |
| H | -0.84748600 | -2.27923000 | 1.89100000  |
| H | -2.84465600 | -0.90868800 | 2.37926100  |
| H | -3.23911400 | -2.60938000 | 2.18315200  |
| N | -4.88340800 | -2.15163100 | -1.58501900 |
| H | -5.33658800 | -1.24575900 | -1.69693800 |
| H | -4.66260200 | -2.46625700 | -2.52868600 |
| O | -1.04501800 | -0.81938300 | 0.43659200  |
| H | -0.89420400 | 0.48718700  | 1.35595700  |
| C | 5.24646100  | -0.85059000 | -1.30837000 |
| C | 5.27663700  | 0.21971500  | -0.21117500 |
| N | 3.10560900  | -0.72664200 | -0.25119900 |
| H | 5.92876300  | -1.68472700 | -1.12162600 |
| H | 5.46709000  | 1.23097400  | -0.58400700 |
| C | 3.87275900  | 0.16906700  | 0.37457700  |
| O | 3.54397000  | 0.91396800  | 1.33746900  |
| C | 3.80265100  | -1.37546900 | -1.28572100 |
| O | 3.32941900  | -2.20711300 | -2.02452000 |
| H | 5.47054000  | -0.46804600 | -2.30752500 |
| H | 6.00486800  | 0.03081800  | 0.58297400  |
| C | -2.53459800 | 3.62886200  | -0.26425000 |
| C | -1.78213200 | 3.21929200  | -1.55364400 |
| C | -2.34620000 | 2.59781100  | 0.85550000  |
| C | -0.53284900 | 2.36927800  | -1.22462500 |
| C | -0.87282000 | 2.53355000  | 1.29660700  |
| C | 0.08428700  | 2.79601500  | 0.11117800  |
| H | -2.14476400 | 4.60152000  | 0.06279700  |
| H | -0.79567500 | 1.30712100  | -1.18693900 |
| H | -2.63698100 | 1.60676000  | 0.48593700  |
| H | -3.60029900 | 3.77332800  | -0.47541300 |
| H | -2.46191700 | 2.59484400  | -2.16019300 |
| H | -2.98798800 | 2.81476900  | 1.71511900  |
| H | 0.20072900  | 2.47449900  | -2.03236700 |
| H | -0.68695800 | 3.27921600  | 2.07733500  |
| H | 1.03666100  | 2.28791900  | 0.28816800  |
| H | 0.30158500  | 3.86941300  | 0.06596300  |
| N | -1.36645300 | 4.44317400  | -2.25796600 |
| H | -0.99668000 | 4.20060500  | -3.17537200 |
| H | -2.17877700 | 5.03329100  | -2.43021100 |

|    |             |             |            |
|----|-------------|-------------|------------|
| O  | -0.62932200 | 1.26376300  | 1.95281900 |
| H  | 0.65345400  | 1.01052100  | 2.40546400 |
| O  | 1.61880500  | 0.69527100  | 2.79211100 |
| H  | 2.46496500  | 0.79036700  | 2.04181500 |
| H  | 1.52266200  | -0.25627700 | 2.94627100 |
| Br | 0.95413200  | -0.88863600 | 0.05046900 |

**COM2'f**

|    |             |             |             |
|----|-------------|-------------|-------------|
| C  | 4.40155000  | -0.63245800 | -1.54363100 |
| C  | 5.57425100  | -0.41226600 | -0.55892100 |
| C  | 3.11964800  | -1.05850900 | -0.81966800 |
| C  | 5.05898400  | 0.05558800  | 0.82361100  |
| C  | 2.62201600  | 0.04784300  | 0.12819300  |
| C  | 3.78793500  | 0.89520200  | 0.67840800  |
| H  | 4.22822800  | 0.31007000  | -2.07887200 |
| H  | 4.84512000  | -0.81685400 | 1.45205600  |
| H  | 3.31546600  | -1.95057000 | -0.21270800 |
| H  | 4.67809400  | -1.37559100 | -2.30041400 |
| H  | 6.08631500  | -1.38067100 | -0.41691100 |
| H  | 2.33364300  | -1.33376600 | -1.52884700 |
| H  | 5.84643700  | 0.62421300  | 1.33213300  |
| H  | 1.92184300  | 0.70744800  | -0.40494600 |
| H  | 3.48340400  | 1.34740700  | 1.62802000  |
| H  | 3.98760000  | 1.72161900  | -0.01369400 |
| N  | 6.46708400  | 0.61668700  | -1.11751700 |
| H  | 7.32168300  | 0.66461300  | -0.56550500 |
| H  | 6.75521500  | 0.34628000  | -2.05648500 |
| O  | 1.91819100  | -0.60537800 | 1.20275900  |
| H  | 1.54116400  | 0.09079100  | 1.80964600  |
| C  | -3.45025300 | -3.70312900 | -1.05618000 |
| C  | -4.16592500 | -2.70483000 | -0.13345600 |
| N  | -1.85059200 | -2.30756100 | -0.02466700 |
| H  | -3.72840400 | -3.59852300 | -2.10862000 |
| H  | -4.70855200 | -3.18065200 | 0.68861300  |
| C  | -3.05431300 | -1.84224000 | 0.45792600  |
| O  | -3.21418800 | -0.90488500 | 1.22504000  |
| C  | -1.96025300 | -3.38630200 | -0.91472000 |
| O  | -1.03698000 | -3.94374700 | -1.45813700 |
| Br | -0.14664100 | -1.55627200 | 0.49522500  |
| H  | -3.61229100 | -4.74911900 | -0.78248200 |
| H  | -4.87545100 | -2.05395000 | -0.65170200 |
| C  | -0.85283800 | 4.11489900  | -0.69917000 |
| C  | -2.07569800 | 3.89666300  | -1.62762500 |
| C  | -0.98029700 | 3.40795600  | 0.66797200  |
| C  | -3.33508500 | 3.63447200  | -0.78915900 |
| C  | -1.75469100 | 2.09968800  | 0.54305400  |
| C  | -3.20581300 | 2.37172200  | 0.09577600  |

|   |             |            |             |
|---|-------------|------------|-------------|
| H | 0.04581300  | 3.76076900 | -1.21916600 |
| H | -3.50890300 | 4.51752800 | -0.16236600 |
| H | -1.51101000 | 4.05148600 | 1.38183000  |
| H | -0.70939400 | 5.18874700 | -0.53567200 |
| H | -2.23617800 | 4.82202300 | -2.20821000 |
| H | 0.00895600  | 3.22035900 | 1.09617200  |
| H | -4.21320500 | 3.55235400 | -1.44229800 |
| H | -1.26001600 | 1.45932600 | -0.19709500 |
| H | -3.81155400 | 2.49658900 | 1.00024900  |
| H | -3.59370300 | 1.49330500 | -0.42768800 |
| N | -1.82950400 | 2.73305100 | -2.49760300 |
| H | -2.61769900 | 2.60445600 | -3.12976500 |
| H | -1.01877600 | 2.91064400 | -3.08685600 |
| O | -1.73355200 | 1.43741200 | 1.82369100  |
| H | -2.15123900 | 0.56073500 | 1.70259700  |
| O | 0.79080900  | 1.27147500 | 2.70589000  |
| H | -0.16216700 | 1.30752900 | 2.41922900  |
| H | 0.77351800  | 1.11087300 | 3.65699800  |

### TS3'<sub>f</sub>

|   |             |             |             |
|---|-------------|-------------|-------------|
| C | -4.71547300 | -0.06623600 | -1.49439300 |
| C | -5.70873300 | -0.55364300 | -0.41285500 |
| C | -3.47726200 | 0.59355800  | -0.87647400 |
| C | -4.96838400 | -0.92362200 | 0.89460500  |
| C | -2.66122400 | -0.41841600 | -0.04348900 |
| C | -3.57721500 | -1.48709300 | 0.59642600  |
| H | -4.40935100 | -0.93642300 | -2.08985700 |
| H | -4.86992200 | -0.03359900 | 1.52669500  |
| H | -3.78270300 | 1.40369900  | -0.20343400 |
| H | -5.21635500 | 0.62338300  | -2.18385500 |
| H | -6.39923100 | 0.27761000  | -0.18405700 |
| H | -2.84600500 | 1.05011500  | -1.64458000 |
| H | -5.56819100 | -1.64673200 | 1.46022800  |
| H | -1.93244500 | -0.92471400 | -0.69760700 |
| H | -3.09320800 | -1.87238000 | 1.50017500  |
| H | -3.68241000 | -2.33190100 | -0.09423400 |
| N | -6.41392400 | -1.74157700 | -0.92319600 |
| H | -7.18286800 | -1.97820300 | -0.29854500 |
| H | -6.84019000 | -1.52553400 | -1.82282400 |
| O | -1.96779100 | 0.24852200  | 1.01414300  |
| H | -1.01775700 | -0.63355900 | 1.96333600  |
| C | 2.61936400  | 4.50977500  | -0.86714900 |
| C | 3.47399800  | 3.59821500  | 0.02012600  |
| N | 1.32324800  | 2.61745900  | -0.17129200 |
| H | 2.99964800  | 4.60493600  | -1.88809300 |
| H | 3.80776400  | 4.06951700  | 0.94997200  |
| C | 2.52954800  | 2.45452400  | 0.35683400  |

|    |             |             |             |
|----|-------------|-------------|-------------|
| O  | 2.93142100  | 1.48436200  | 1.06896900  |
| C  | 1.24841800  | 3.81503300  | -0.90804200 |
| O  | 0.26031700  | 4.21639800  | -1.47682200 |
| Br | -0.45965900 | 1.39692800  | 0.35757800  |
| H  | 2.49450000  | 5.52176900  | -0.47312400 |
| H  | 4.36531700  | 3.19793300  | -0.47204800 |
| C  | 1.91553400  | -3.81798500 | -0.69362300 |
| C  | 3.44173600  | -4.02132200 | -0.53942000 |
| C  | 1.36350900  | -2.82290600 | 0.33473500  |
| C  | 4.11278600  | -2.75228300 | 0.03722900  |
| C  | 1.95580100  | -1.42285700 | 0.09929700  |
| C  | 3.39442400  | -1.48775100 | -0.44024600 |
| H  | 1.72346900  | -3.44223300 | -1.70672700 |
| H  | 4.09748600  | -2.78948500 | 1.13275100  |
| H  | 1.63311400  | -3.14839300 | 1.34632000  |
| H  | 1.39304300  | -4.77731400 | -0.61051000 |
| H  | 3.60636600  | -4.84492400 | 0.17778500  |
| H  | 0.27108800  | -2.78613000 | 0.30383400  |
| H  | 5.16757800  | -2.73078100 | -0.25944800 |
| H  | 1.31907700  | -0.84750900 | -0.58245800 |
| H  | 3.93265400  | -0.58200800 | -0.14599300 |
| H  | 3.35778600  | -1.49622300 | -1.53502400 |
| N  | 4.01073000  | -4.30711600 | -1.86565100 |
| H  | 4.98106300  | -4.60037100 | -1.76834100 |
| H  | 3.52067700  | -5.09293600 | -2.28952900 |
| O  | 1.97198100  | -0.69830000 | 1.37321600  |
| H  | 2.32353800  | 0.42921700  | 1.22171700  |
| O  | -0.30518400 | -1.09007000 | 2.51452700  |
| H  | 1.06641400  | -0.79577300 | 1.84306900  |
| H  | -0.37918800 | -0.70412000 | 3.39650300  |

**COM2'g**

|   |             |             |             |
|---|-------------|-------------|-------------|
| C | -3.61849600 | 0.14596600  | 1.46347000  |
| C | -3.52326200 | -1.30795300 | 0.94288300  |
| C | -2.50904300 | 1.03036800  | 0.88221900  |
| C | -2.90321600 | -1.35437300 | -0.47459400 |
| C | -2.65702000 | 1.16948400  | -0.64961100 |
| C | -3.25980100 | -0.10003700 | -1.27804700 |
| H | -4.59725600 | 0.54643500  | 1.16957100  |
| H | -1.81391700 | -1.44397200 | -0.39939900 |
| H | -1.52982300 | 0.58333000  | 1.09015400  |
| H | -3.59004100 | 0.15956900  | 2.55939400  |
| H | -2.85460500 | -1.86872200 | 1.62028300  |
| H | -2.51127100 | 2.01960800  | 1.35514100  |
| H | -3.25227400 | -2.25485100 | -0.99312700 |
| H | -3.31757500 | 2.02047700  | -0.87375700 |
| H | -2.90696700 | -0.16821800 | -2.31177700 |

|    |             |             |             |
|----|-------------|-------------|-------------|
| H  | -4.35045400 | -0.00490600 | -1.31337900 |
| N  | -4.88053700 | -1.87556500 | 0.89823000  |
| H  | -4.82838500 | -2.87184400 | 0.69372500  |
| H  | -0.95002900 | 2.17673400  | -0.83060400 |
| O  | -1.39144500 | 1.42132900  | -1.28191800 |
| C  | 4.48820300  | -0.06699700 | 1.04925200  |
| C  | 4.41687600  | -1.49855800 | 0.48861100  |
| N  | 2.43274600  | -0.35804900 | -0.04687100 |
| H  | 5.30883300  | 0.52535800  | 0.63512100  |
| H  | 4.48538800  | -2.27259900 | 1.25768500  |
| C  | 3.05086300  | -1.60845900 | -0.19164700 |
| O  | 2.57528000  | -2.56720500 | -0.74877500 |
| C  | 3.16843800  | 0.58607500  | 0.65271600  |
| O  | 2.81069500  | 1.72432200  | 0.89814400  |
| Br | 0.70639000  | 0.10055300  | -0.69177300 |
| H  | 4.58239200  | -0.02870800 | 2.13822300  |
| H  | 5.19039500  | -1.71281300 | -0.25396200 |
| O  | 0.22399400  | 3.22588500  | 0.16376000  |
| H  | -0.05263400 | 3.39476500  | 1.07294600  |
| H  | 1.04523300  | 2.70876300  | 0.25879300  |
| H  | -5.31556400 | -1.80020800 | 1.81630300  |

### TS3'<sub>g</sub>

|   |             |             |             |
|---|-------------|-------------|-------------|
| C | -3.64189700 | 0.28109800  | 1.42029000  |
| C | -3.66950100 | -1.20008300 | 0.97038300  |
| C | -2.38689700 | 1.00703400  | 0.92055700  |
| C | -2.87216900 | -1.40190700 | -0.33874400 |
| C | -2.38629300 | 1.09674500  | -0.61998500 |
| C | -2.97818300 | -0.18217200 | -1.26085600 |
| H | -4.53162900 | 0.77424000  | 1.00712000  |
| H | -1.81994400 | -1.59167400 | -0.10324000 |
| H | -1.48882300 | 0.46545800  | 1.24112500  |
| H | -3.72229900 | 0.34945500  | 2.51151900  |
| H | -3.17993700 | -1.80372500 | 1.75546400  |
| H | -2.32461500 | 2.01354100  | 1.35426900  |
| H | -3.23997300 | -2.29873900 | -0.85141400 |
| H | -3.01674500 | 1.94930900  | -0.91801500 |
| H | -2.46299400 | -0.35383200 | -2.21108200 |
| H | -4.03587800 | -0.01505100 | -1.49294600 |
| N | -5.07158500 | -1.59416500 | 0.75502400  |
| H | -5.12328600 | -2.59806600 | 0.59167900  |
| H | -0.22607300 | 2.36289700  | -0.40845800 |
| O | -1.09883100 | 1.41595200  | -1.15057300 |
| C | 4.38853300  | 0.13619200  | 1.07347200  |
| C | 4.51510200  | -1.33499500 | 0.65588400  |
| N | 2.41080600  | -0.47599800 | -0.07051900 |
| H | 5.14315600  | 0.79164900  | 0.62830300  |



|    |             |             |             |
|----|-------------|-------------|-------------|
| H  | 4.62602300  | -2.02193100 | 1.49918000  |
| C  | 3.19466400  | -1.64460300 | -0.06783600 |
| O  | 2.86792700  | -2.70078100 | -0.55340600 |
| C  | 3.01671900  | 0.53607700  | 0.55488300  |
| O  | 2.57474000  | 1.70876600  | 0.73792000  |
| Br | 0.45831400  | 0.09773700  | -0.78325600 |
| H  | 4.42432600  | 0.29702400  | 2.15522400  |
| H  | 5.34604400  | -1.52568100 | -0.02853200 |
| O  | 0.54134900  | 2.88583700  | 0.11048900  |
| H  | 0.16882500  | 3.25497600  | 0.92209700  |
| H  | 1.49802400  | 2.20208400  | 0.36527900  |
| H  | -5.61168900 | -1.42011300 | 1.60111300  |

**COM2'h**

|    |             |             |             |
|----|-------------|-------------|-------------|
| C  | -3.37417500 | -1.39285600 | 1.27317900  |
| C  | -4.60818900 | -1.32877900 | 0.35553200  |
| C  | -2.08896000 | -1.11584400 | 0.49383800  |
| C  | -4.39805400 | -0.30488000 | -0.77607900 |
| C  | -2.07961800 | 0.31687000  | -0.05883500 |
| C  | -3.50384300 | 0.83531000  | -0.29834200 |
| H  | -3.49664800 | -0.63927600 | 2.06218700  |
| H  | -3.92469700 | -0.79142000 | -1.63719500 |
| H  | -2.01877000 | -1.80013400 | -0.36201900 |
| H  | -3.32237600 | -2.36853200 | 1.76901100  |
| H  | -4.74821700 | -2.32311600 | -0.10028300 |
| H  | -1.20667100 | -1.29482500 | 1.11456200  |
| H  | -5.37207900 | 0.06753900  | -1.11256600 |
| H  | -1.55088700 | 0.98843000  | 0.63385000  |
| H  | -3.46298900 | 1.65970500  | -1.01770900 |
| H  | -3.91019400 | 1.24520900  | 0.63409300  |
| N  | -5.76497400 | -0.92466500 | 1.16151800  |
| H  | -6.62364000 | -1.00153600 | 0.62372500  |
| H  | -5.86501700 | -1.52650600 | 1.97473400  |
| O  | -1.34878900 | 0.28207200  | -1.29313100 |
| H  | -1.27203000 | 1.21115100  | -1.58944400 |
| C  | 4.71614000  | -0.03515800 | 1.22144800  |
| C  | 4.89197700  | -1.27397900 | 0.33734700  |
| N  | 2.76143700  | -0.34733200 | -0.03931000 |
| H  | 5.39997500  | 0.77895300  | 0.96869400  |
| H  | 5.01175500  | -2.19852100 | 0.90728400  |
| C  | 3.60343100  | -1.38451700 | -0.46594000 |
| O  | 3.32682100  | -2.19787400 | -1.30504800 |
| C  | 3.30118900  | 0.44242300  | 0.94955200  |
| O  | 2.74262100  | 1.37619700  | 1.49156800  |
| Br | 1.01578300  | -0.11163400 | -0.66089600 |
| H  | 4.81877900  | -0.23274500 | 2.29048700  |
| H  | 5.73007200  | -1.20513600 | -0.35907000 |

|   |             |            |             |
|---|-------------|------------|-------------|
| O | 0.28829400  | 2.74249600 | 1.11378700  |
| H | 1.09010700  | 2.19277300 | 1.18396800  |
| H | 0.31120400  | 3.35814500 | 1.85221900  |
| O | -0.99134300 | 2.99318500 | -1.30446700 |
| H | -0.50977600 | 3.55492600 | -1.91801500 |
| H | -0.50578300 | 3.01593300 | -0.45447400 |

**TS3'h**

|    |             |             |             |
|----|-------------|-------------|-------------|
| C  | -3.74475900 | -1.67943800 | 0.58170200  |
| C  | -4.80157600 | -0.97386000 | -0.28737300 |
| C  | -2.33096800 | -1.25565700 | 0.18499900  |
| C  | -4.31434900 | 0.42282900  | -0.71871000 |
| C  | -2.10994200 | 0.23993600  | 0.47145100  |
| C  | -3.42611400 | 1.02605900  | 0.36507100  |
| H  | -3.92952900 | -1.41048300 | 1.63050300  |
| H  | -3.74326200 | 0.34993700  | -1.65158200 |
| H  | -2.18230300 | -1.41143700 | -0.89140900 |
| H  | -3.85960600 | -2.76625900 | 0.50738100  |
| H  | -4.95918700 | -1.57920500 | -1.19546800 |
| H  | -1.57633900 | -1.86017700 | 0.69562600  |
| H  | -5.18163800 | 1.06147700  | -0.92100900 |
| H  | -1.68811700 | 0.36990800  | 1.48118200  |
| H  | -3.19706600 | 2.07913500  | 0.17079300  |
| H  | -3.95771800 | 0.98499500  | 1.32324800  |
| N  | -6.03069400 | -0.82980600 | 0.49957600  |
| H  | -6.79854800 | -0.50915900 | -0.08353200 |
| H  | -6.30923500 | -1.72224100 | 0.89882800  |
| O  | -1.19697100 | 0.78132800  | -0.47828600 |
| H  | -0.85270300 | 2.15661100  | -0.29005000 |
| C  | 4.98866700  | -0.56397100 | 0.29262800  |
| C  | 4.56672400  | -2.01850600 | 0.08957700  |
| N  | 2.65166500  | -0.59479900 | -0.06658900 |
| H  | 5.68416200  | -0.18871500 | -0.46226500 |
| H  | 4.77285800  | -2.66174900 | 0.94770300  |
| C  | 3.05306200  | -1.94109300 | -0.11518800 |
| O  | 2.30741700  | -2.86908200 | -0.29138400 |
| C  | 3.68353900  | 0.19572000  | 0.17254200  |
| O  | 3.66376300  | 1.45118900  | 0.29689100  |
| Br | 0.63679800  | 0.05598800  | -0.28192800 |
| H  | 5.42649000  | -0.35890400 | 1.27296200  |
| H  | 5.01307700  | -2.48654200 | -0.79063100 |
| O  | 1.96255800  | 3.11415800  | 0.30005600  |
| H  | 2.70190700  | 2.18209000  | 0.25880900  |
| H  | 2.08867100  | 3.61900800  | 1.11097500  |
| O  | -0.44773300 | 3.11376200  | -0.14909700 |
| H  | -0.70306000 | 3.66087800  | -0.89928900 |
| H  | 0.91844900  | 3.06054900  | 0.07817200  |

**COM2'i**

|    |             |             |             |
|----|-------------|-------------|-------------|
| C  | -3.38651200 | -1.46141000 | 1.29229800  |
| C  | -4.65827900 | -1.36992400 | 0.42901700  |
| C  | -2.12834000 | -1.25898800 | 0.44929200  |
| C  | -4.45226200 | -0.40033700 | -0.75041000 |
| C  | -2.08875800 | 0.15759300  | -0.14068000 |
| C  | -3.50042500 | 0.72211800  | -0.34773100 |
| H  | -3.44311500 | -0.68283300 | 2.06478900  |
| H  | -4.02985700 | -0.93720700 | -1.60797200 |
| H  | -2.12298700 | -1.96493900 | -0.39088600 |
| H  | -3.35095700 | -2.42432600 | 1.81314100  |
| H  | -4.86792100 | -2.37168700 | 0.01886200  |
| H  | -1.22393100 | -1.45602100 | 1.03139600  |
| H  | -5.42278100 | -0.00270500 | -1.06689900 |
| H  | -1.52186300 | 0.82130000  | 0.53264200  |
| H  | -3.46149100 | 1.51884100  | -1.09867100 |
| H  | -3.85904300 | 1.17747800  | 0.58340500  |
| N  | -5.75377400 | -0.87623300 | 1.26919300  |
| H  | -6.63996300 | -0.92900800 | 0.77489900  |
| H  | -5.84556000 | -1.44063300 | 2.10978300  |
| O  | -1.38788500 | 0.06180100  | -1.38318200 |
| H  | -1.36125800 | 0.94705800  | -1.78143300 |
| C  | 4.75765300  | -0.00599600 | 1.22718100  |
| C  | 4.93275900  | -1.29564300 | 0.41865100  |
| N  | 2.79751400  | -0.40696800 | -0.00047200 |
| H  | 5.44019500  | 0.79167600  | 0.92400600  |
| H  | 5.06983100  | -2.18249000 | 1.04207100  |
| C  | 3.63760900  | -1.46840100 | -0.36111900 |
| O  | 3.35689000  | -2.34201200 | -1.13647200 |
| C  | 3.33987600  | 0.45770600  | 0.93639600  |
| O  | 2.77807800  | 1.41624100  | 1.41382400  |
| Br | 1.07340700  | -0.22466400 | -0.65610000 |
| H  | 4.86466800  | -0.14062600 | 2.30550200  |
| H  | 5.76099700  | -1.26163800 | -0.29218500 |
| C  | -0.46014000 | 3.14188800  | -0.38578700 |
| N  | -0.95583500 | 2.97380900  | -1.41724900 |
| C  | 0.15891800  | 3.33557700  | 0.92260900  |
| H  | 0.92596700  | 2.57156200  | 1.08103300  |
| H  | 0.61977500  | 4.32408300  | 0.96853300  |
| H  | -0.60453400 | 3.25775500  | 1.69950400  |

**TS3'i**

|   |             |             |             |
|---|-------------|-------------|-------------|
| C | -3.78209400 | -1.59746700 | 0.75674800  |
| C | -4.83656200 | -1.01346000 | -0.20086700 |
| C | -2.36661800 | -1.23618500 | 0.30661700  |
| C | -4.34390800 | 0.30951900  | -0.81825600 |

|    |             |             |             |
|----|-------------|-------------|-------------|
| C  | -2.14720600 | 0.28145800  | 0.40156900  |
| C  | -3.45469800 | 1.05378800  | 0.17335400  |
| H  | -3.96408300 | -1.18528800 | 1.75838100  |
| H  | -3.77621500 | 0.11006600  | -1.73462000 |
| H  | -2.22023200 | -1.53125000 | -0.74045600 |
| H  | -3.89884900 | -2.68371900 | 0.83274400  |
| H  | -4.99619500 | -1.73721500 | -1.01714500 |
| H  | -1.61506600 | -1.77194300 | 0.89251600  |
| H  | -5.20789000 | 0.91966900  | -1.10347600 |
| H  | -1.72886500 | 0.54431700  | 1.38624000  |
| H  | -3.22043100 | 2.06735700  | -0.16723400 |
| H  | -3.98873200 | 1.15051000  | 1.12605300  |
| N  | -6.06361700 | -0.75844500 | 0.55984200  |
| H  | -6.82899600 | -0.51106200 | -0.06090000 |
| H  | -6.34951800 | -1.58871000 | 1.07215300  |
| O  | -1.21968500 | 0.70451200  | -0.60513700 |
| H  | -0.86918400 | 2.04858200  | -0.39214500 |
| C  | 4.97834200  | -0.73345500 | 0.33322000  |
| C  | 4.51355200  | -2.17050700 | 0.10467100  |
| N  | 2.64179900  | -0.67189600 | -0.05416700 |
| H  | 5.69584200  | -0.36888800 | -0.40623200 |
| H  | 4.68911500  | -2.83199000 | 0.95548200  |
| C  | 3.00641400  | -2.03929900 | -0.11585300 |
| O  | 2.22853200  | -2.93268700 | -0.31178500 |
| C  | 3.69631100  | 0.05585200  | 0.20165000  |
| O  | 3.75232200  | 1.32950400  | 0.34568100  |
| Br | 0.57661600  | -0.01292800 | -0.33940700 |
| H  | 5.40556100  | -0.55264500 | 1.32300300  |
| H  | 4.95535500  | -2.63887000 | -0.77754600 |
| C  | 0.75247800  | 3.22762800  | 0.09588500  |
| N  | -0.39516000 | 3.04092000  | -0.13939200 |
| C  | 2.07300600  | 3.42220400  | 0.36809800  |
| H  | 2.88870900  | 1.94849200  | 0.28607700  |
| H  | 2.63541200  | 3.95922300  | -0.39047200 |
| H  | 2.30810600  | 3.66069200  | 1.40176200  |

### TS6a

|   |             |             |            |
|---|-------------|-------------|------------|
| C | 2.58497800  | -1.67694500 | 1.74370300 |
| C | 3.42965600  | -0.68478300 | 1.37497700 |
| C | 1.32409900  | 0.00503500  | 0.89178900 |
| N | 1.31195200  | -1.23122400 | 1.44875900 |
| H | 2.78821700  | -2.64983300 | 2.16175300 |
| H | 4.50636400  | -0.63355100 | 1.40976100 |
| N | 2.64045500  | 0.33180600  | 0.87182000 |
| C | 0.09523400  | -1.99896200 | 1.71728200 |
| C | -0.22309900 | -1.98437200 | 3.21080700 |
| C | 0.20032000  | -3.41386300 | 1.15613900 |

|   |             |             |             |
|---|-------------|-------------|-------------|
| H | -0.69075200 | -1.45724300 | 1.18989900  |
| H | -0.28365400 | -0.95675800 | 3.58111700  |
| H | -1.18044400 | -2.48087600 | 3.39388500  |
| H | 0.55305000  | -2.51053100 | 3.77707000  |
| H | 0.47433900  | -3.38909600 | 0.09781300  |
| H | 0.95244900  | -3.99703000 | 1.69828800  |
| H | -0.75928100 | -3.92583400 | 1.27819800  |
| C | 3.18099300  | 1.59712700  | 0.36154800  |
| C | 4.18226000  | 1.32628800  | -0.75848400 |
| C | 3.78266500  | 2.41063300  | 1.50443200  |
| H | 2.32061500  | 2.13108000  | -0.04515300 |
| H | 3.76153400  | 0.63712000  | -1.49473600 |
| H | 4.44801000  | 2.26475500  | -1.25314100 |
| H | 5.10323200  | 0.88393900  | -0.36257900 |
| H | 3.03419300  | 2.59746200  | 2.27959100  |
| H | 4.62889900  | 1.88427500  | 1.95905500  |
| H | 4.14586400  | 3.37117800  | 1.12783900  |
| C | 0.03271700  | 0.82896800  | -0.89607900 |
| O | 1.08591300  | 0.95256400  | -1.66543200 |
| C | -0.45804200 | 2.11550200  | -0.31161200 |
| C | -0.49746200 | 3.20776600  | -1.18177700 |
| C | -0.91949600 | 2.24735200  | 0.99818300  |
| C | -1.01309300 | 4.42661200  | -0.74469500 |
| H | -0.11959900 | 3.09407400  | -2.19300800 |
| C | -1.44666000 | 3.46277700  | 1.42492500  |
| H | -0.82520600 | 1.40814200  | 1.67909200  |
| C | -1.49829600 | 4.55298900  | 0.55488500  |
| H | -1.03714800 | 5.27504000  | -1.42109700 |
| H | -1.80037300 | 3.56567200  | 2.44608700  |
| H | -1.90106900 | 5.50150700  | 0.89629800  |
| H | 1.42764600  | 0.01663800  | -1.93949100 |
| C | -2.56695300 | -1.81714800 | -0.79682600 |
| C | -2.14346500 | -0.35832300 | -0.55277100 |
| C | -4.09516500 | -2.00058600 | -0.71515900 |
| C | -3.20356200 | 0.57809900  | -1.14079400 |
| C | -4.72119300 | -0.97763100 | 0.22170900  |
| C | -4.50438500 | 0.44576000  | -0.32797200 |
| H | -2.21975800 | -2.12165500 | -1.79202300 |
| H | -2.86338900 | 1.61634900  | -1.13781900 |
| H | -4.33651900 | -3.01210400 | -0.37833400 |
| H | -2.06982400 | -2.46995300 | -0.07520000 |
| H | -2.09214900 | -0.18007200 | 0.52678300  |
| H | -4.54935200 | -1.87066400 | -1.70408900 |
| H | -3.36798300 | 0.29659000  | -2.18895200 |
| H | -5.79709000 | -1.17440600 | 0.32232100  |
| H | -4.48812100 | 1.14708800  | 0.51638300  |
| H | -5.35883000 | 0.72592200  | -0.95322100 |

|    |             |             |             |
|----|-------------|-------------|-------------|
| N  | -0.81603300 | -0.17032000 | -1.13840400 |
| H  | -0.37607900 | -0.97884000 | -1.59282100 |
| O  | -4.09083700 | -1.16348500 | 1.49067200  |
| H  | -4.51820800 | -0.59634800 | 2.14186400  |
| Br | 1.86979700  | -1.90257900 | -1.92096700 |

**INT6a**

|    |             |             |             |
|----|-------------|-------------|-------------|
| C  | 0.13459000  | -1.35215300 | 0.26927500  |
| O  | -0.51725800 | -2.46871900 | 0.26393800  |
| C  | 1.60161700  | -1.46933200 | 0.12204500  |
| C  | 2.09955400  | -2.50769200 | -0.66994000 |
| C  | 2.47923500  | -0.61137400 | 0.79012800  |
| C  | 3.47173800  | -2.66170800 | -0.82112300 |
| H  | 1.40320600  | -3.18137400 | -1.15726500 |
| C  | 3.85116300  | -0.77946000 | 0.64522900  |
| H  | 2.09147300  | 0.16470100  | 1.44173400  |
| C  | 4.34659000  | -1.79770500 | -0.16587900 |
| H  | 3.85900600  | -3.45992200 | -1.44506300 |
| H  | 4.53222500  | -0.11948800 | 1.17140300  |
| H  | 5.41841500  | -1.92445200 | -0.27981700 |
| H  | -1.55215600 | -2.30218700 | 0.18681200  |
| C  | -0.08353500 | 2.02546300  | 1.35515400  |
| C  | -0.05069000 | 1.14371400  | 0.09299600  |
| C  | -0.30890500 | 3.51233000  | 1.01850500  |
| C  | -0.98336600 | 1.71509300  | -0.98057800 |
| C  | 0.27884800  | 3.84896700  | -0.34435600 |
| C  | -0.47805800 | 3.09052000  | -1.44896100 |
| H  | -0.88757900 | 1.67093500  | 2.00845300  |
| H  | -1.06266700 | 1.01588800  | -1.81739700 |
| H  | 0.14344700  | 4.14372300  | 1.78703700  |
| H  | 0.85465100  | 1.90778500  | 1.90464100  |
| H  | 0.96482900  | 1.09972200  | -0.30443800 |
| H  | -1.37958700 | 3.74166100  | 0.99606700  |
| H  | -1.99158900 | 1.79351100  | -0.55460700 |
| H  | 0.20614900  | 4.93032200  | -0.52648500 |
| H  | 0.19127300  | 2.97587100  | -2.31037000 |
| H  | -1.32579200 | 3.69318400  | -1.78928900 |
| N  | -0.49895100 | -0.21439500 | 0.40720000  |
| H  | -1.53888000 | -0.33426700 | 0.47247000  |
| O  | 1.64752800  | 3.46012500  | -0.28388200 |
| H  | 2.06148900  | 3.68676500  | -1.12401000 |
| Br | -3.30543100 | -1.45351000 | -0.01501900 |

**TS7a**

|   |             |             |             |
|---|-------------|-------------|-------------|
| C | -0.72279600 | -0.77471400 | 0.26557100  |
| O | 0.29355500  | -1.44324200 | 0.46428700  |
| C | -0.65067000 | 0.47437900  | -0.56075400 |

|    |             |             |             |
|----|-------------|-------------|-------------|
| C  | 0.10216300  | 0.45302500  | -1.73398800 |
| C  | -1.23440300 | 1.66706000  | -0.13165900 |
| C  | 0.25236200  | 1.61358100  | -2.48548800 |
| H  | 0.56855400  | -0.47383800 | -2.05089200 |
| C  | -1.06153300 | 2.83161700  | -0.86983200 |
| H  | -1.79774400 | 1.69090200  | 0.79448000  |
| C  | -0.32366000 | 2.80409300  | -2.05151600 |
| H  | 0.83293600  | 1.59258800  | -3.40022600 |
| H  | -1.49906600 | 3.75995000  | -0.52230000 |
| H  | -0.19385900 | 3.71173800  | -2.62912800 |
| H  | 2.23026700  | -1.35300500 | -0.22229400 |
| C  | -4.01681300 | -0.14445300 | 1.64467700  |
| C  | -3.25440800 | -0.70228400 | 0.43028100  |
| C  | -5.54355300 | -0.27576600 | 1.48657100  |
| C  | -4.02859500 | -1.86730500 | -0.18787900 |
| C  | -5.95775800 | -0.19913500 | 0.02089400  |
| C  | -5.36314300 | -1.37037400 | -0.76957800 |
| H  | -3.69887100 | -0.69144800 | 2.53694600  |
| H  | -3.42777400 | -2.34190300 | -0.96640900 |
| H  | -6.05227900 | 0.49906300  | 2.06613500  |
| H  | -3.73731400 | 0.90052000  | 1.79783400  |
| H  | -3.15556800 | 0.07284900  | -0.32758800 |
| H  | -5.88621100 | -1.23811200 | 1.87919400  |
| H  | -4.20641200 | -2.62108000 | 0.58815500  |
| H  | -7.04918300 | -0.22151300 | -0.06072300 |
| H  | -5.22620400 | -1.03767700 | -1.80143300 |
| H  | -6.08159600 | -2.19241700 | -0.78778200 |
| N  | -1.90535200 | -1.11725100 | 0.81821200  |
| H  | -1.84952600 | -1.94842500 | 1.39770100  |
| O  | -5.47366900 | 1.00979700  | -0.57764800 |
| H  | -5.81867600 | 1.75560600  | -0.07640700 |
| Br | 3.13865100  | -2.20750400 | -0.95354700 |
| N  | 3.18489200  | 0.86793200  | 0.95468300  |
| C  | 2.21782500  | 1.96307400  | 1.09231200  |
| C  | 1.17542300  | 1.73644700  | 2.18166200  |
| H  | 1.69686100  | 2.07301700  | 0.13808500  |
| H  | 2.74844900  | 2.91501900  | 1.28719700  |
| H  | 0.38073300  | 2.47750600  | 2.07646300  |
| H  | 0.73178100  | 0.74145700  | 2.08326700  |
| H  | 1.59132700  | 1.83705600  | 3.18515700  |
| C  | 3.81879500  | 0.57833400  | 2.24510900  |
| C  | 4.85952400  | -0.53470200 | 2.19810700  |
| H  | 3.03537200  | 0.27561400  | 2.94050600  |
| H  | 4.27866800  | 1.49725600  | 2.65688600  |
| H  | 4.45818600  | -1.41121400 | 1.68477700  |
| H  | 5.77847400  | -0.23095200 | 1.69496800  |
| H  | 5.12286800  | -0.82350000 | 3.21764500  |

|   |            |            |             |
|---|------------|------------|-------------|
| C | 4.20145800 | 1.19875600 | -0.04688800 |
| C | 3.63901700 | 1.54965200 | -1.41812500 |
| H | 4.84876000 | 0.32791700 | -0.16215900 |
| H | 4.83501200 | 2.03086700 | 0.31626600  |
| H | 4.45822300 | 1.61058700 | -2.13791900 |
| H | 2.94498500 | 0.77666000 | -1.75403800 |
| H | 3.11475000 | 2.50663100 | -1.42846800 |

**TS5'**

|   |             |             |             |
|---|-------------|-------------|-------------|
| C | 2.23299400  | -2.27690800 | 1.61160700  |
| C | 2.97716000  | -1.16916400 | 1.81412000  |
| C | 1.66962100  | -0.80128300 | 0.02307900  |
| N | 1.43146700  | -2.05788900 | 0.50780200  |
| H | 2.18723600  | -3.19785300 | 2.16962700  |
| H | 3.71968400  | -0.95480000 | 2.56503700  |
| N | 2.65069000  | -0.25655400 | 0.82039900  |
| C | 0.46741800  | -3.06913900 | 0.02315200  |
| C | -0.49424300 | -3.45536800 | 1.13985200  |
| C | 1.23342200  | -4.25492000 | -0.55499000 |
| H | -0.10399300 | -2.59418000 | -0.76509700 |
| H | -1.01014500 | -2.56487400 | 1.50604900  |
| H | -1.25025000 | -4.13498600 | 0.73882600  |
| H | 0.01706600  | -3.95742800 | 1.96898300  |
| H | 1.88173500  | -3.92789500 | -1.37216600 |
| H | 1.84622400  | -4.74833100 | 0.20812600  |
| H | 0.52405900  | -4.98903300 | -0.94595500 |
| C | 3.63911400  | 0.75406200  | 0.37996100  |
| C | 4.86244800  | 0.04873000  | -0.20368900 |
| C | 3.99282100  | 1.68924200  | 1.53020700  |
| H | 3.16342000  | 1.33042400  | -0.40990000 |
| H | 4.56475000  | -0.62505400 | -1.01210500 |
| H | 5.55735800  | 0.78936900  | -0.60889400 |
| H | 5.38664000  | -0.53237200 | 0.56196000  |
| H | 3.09725000  | 2.15096400  | 1.95350700  |
| H | 4.52560000  | 1.16290000  | 2.32901300  |
| H | 4.64988400  | 2.48137500  | 1.16245000  |
| C | 1.00240400  | -0.18314400 | -1.07216700 |
| O | 0.74060800  | -1.02510200 | -2.13610600 |
| C | 0.92812500  | 1.24477300  | -1.31445500 |
| C | 0.66987700  | 1.70769800  | -2.62276600 |
| C | 0.97914700  | 2.20910600  | -0.28135400 |
| C | 0.47268400  | 3.05868500  | -2.87972700 |
| H | 0.62930200  | 0.98837100  | -3.43309200 |
| C | 0.78818700  | 3.55913700  | -0.55057300 |
| H | 1.14961600  | 1.89865600  | 0.74591400  |
| C | 0.52928600  | 3.99892600  | -1.84891600 |
| H | 0.27548700  | 3.38219400  | -3.89764200 |



|    |             |             |             |
|----|-------------|-------------|-------------|
| H  | 0.83043200  | 4.27261000  | 0.26857500  |
| H  | 0.37446600  | 5.05319200  | -2.05368000 |
| H  | -0.22261400 | -1.01588400 | -2.26809100 |
| C  | -3.17949600 | 0.97113200  | 2.34239300  |
| C  | -2.70982400 | 2.40219200  | 2.07404300  |
| C  | -2.23561800 | -0.07616400 | 1.72255600  |
| C  | -2.71437900 | 2.68978900  | 0.55793700  |
| C  | -1.58197000 | 0.44242500  | 0.43411600  |
| C  | -2.47859900 | 1.43246600  | -0.29955200 |
| H  | -3.28423200 | 0.79917000  | 3.42061600  |
| H  | -3.67348400 | 3.14142800  | 0.28292700  |
| H  | -2.79841000 | -0.98615900 | 1.49367800  |
| H  | -4.18404900 | 0.86565400  | 1.91453900  |
| H  | -3.41283600 | 3.09561100  | 2.56182700  |
| H  | -1.44561800 | -0.34250300 | 2.43434800  |
| H  | -1.94049800 | 3.43625700  | 0.34095500  |
| H  | -0.68501800 | 0.99469400  | 0.73871000  |
| H  | -3.42983700 | 0.93896800  | -0.53199900 |
| H  | -2.00820100 | 1.70024500  | -1.25232300 |
| N  | -1.34483000 | 2.56462500  | 2.60422900  |
| H  | -1.02971900 | 3.52092200  | 2.46330400  |
| H  | -1.33572600 | 2.39546600  | 3.60734700  |
| O  | -1.07652200 | -0.58398300 | -0.39985500 |
| Br | -2.72408600 | -1.83541000 | -1.03639100 |

### INT5'

|   |             |             |             |
|---|-------------|-------------|-------------|
| C | 2.95932300  | -0.91849100 | 1.63285700  |
| C | 3.55020200  | -0.23909100 | 0.62184800  |
| C | 1.36473000  | 0.02716800  | 0.43532100  |
| N | 1.60022100  | -0.71461600 | 1.53335300  |
| H | 3.39205700  | -1.53000300 | 2.40533500  |
| H | 4.58799800  | -0.15409000 | 0.34675400  |
| N | 2.54951300  | 0.36905100  | -0.09386700 |
| C | 0.63935300  | -1.33253100 | 2.49068400  |
| C | 1.22273000  | -1.29939800 | 3.90072000  |
| C | 0.27377000  | -2.73980700 | 2.03686900  |
| H | -0.24487700 | -0.70124500 | 2.46325400  |
| H | 1.59089000  | -0.30305000 | 4.16340500  |
| H | 0.43051900  | -1.56901400 | 4.60362300  |
| H | 2.03094300  | -2.02467900 | 4.03423400  |
| H | -0.16363400 | -2.72334200 | 1.03744100  |
| H | 1.16305800  | -3.37784400 | 1.99917400  |
| H | -0.43690700 | -3.16677300 | 2.75198700  |
| C | 2.80179300  | 1.21372500  | -1.28713600 |
| C | 3.73008500  | 0.48008700  | -2.24934000 |
| C | 3.33304500  | 2.56980500  | -0.83386200 |
| H | 1.83448700  | 1.33532200  | -1.76929200 |

|   |             |             |             |
|---|-------------|-------------|-------------|
| H | 3.34750500  | -0.52509400 | -2.44769200 |
| H | 3.77679200  | 1.03878500  | -3.18770800 |
| H | 4.74927300  | 0.40964800  | -1.85443600 |
| H | 2.62497800  | 3.06167000  | -0.15923100 |
| H | 4.29613900  | 2.46304800  | -0.32291600 |
| H | 3.48098300  | 3.21092800  | -1.70731200 |
| C | 0.02040700  | 0.46056500  | -0.18113700 |
| O | 0.01260100  | 0.22325100  | -1.53666200 |
| C | -0.18156600 | 1.95951500  | 0.06449300  |
| C | -0.33838600 | 2.85423900  | -0.99138300 |
| C | -0.20451100 | 2.42868500  | 1.37997300  |
| C | -0.51114000 | 4.21458900  | -0.73073300 |
| H | -0.33000200 | 2.47651600  | -2.00851700 |
| C | -0.37399000 | 3.78490000  | 1.63965600  |
| H | -0.09440400 | 1.72371700  | 2.20187500  |
| C | -0.52460500 | 4.68237400  | 0.58092900  |
| H | -0.63770700 | 4.90842500  | -1.55607900 |
| H | -0.38894700 | 4.14306200  | 2.66430100  |
| H | -0.65623100 | 5.74126500  | 0.78064600  |
| H | 0.35319700  | -0.71506300 | -1.67825700 |
| C | -4.60873700 | -0.72745800 | 0.85275100  |
| C | -4.96591600 | -0.72651800 | -0.63523300 |
| C | -3.24556100 | -0.05602200 | 1.10978800  |
| C | -3.93024400 | -1.55257300 | -1.42701200 |
| C | -2.26588600 | -0.26813900 | -0.05087400 |

### TS6'

|   |             |             |             |
|---|-------------|-------------|-------------|
| C | 1.48337600  | -2.92786000 | -1.80402000 |
| C | 2.20391800  | -3.12069400 | -0.67723600 |
| C | 0.76586200  | -1.48083300 | -0.28451100 |
| N | 0.58886200  | -1.91781100 | -1.54375200 |
| H | 1.53925000  | -3.41801900 | -2.75982500 |
| H | 3.00206200  | -3.81085300 | -0.47501500 |
| N | 1.74850600  | -2.22138500 | 0.26233300  |
| C | -0.39996200 | -1.44532400 | -2.54688100 |
| C | -1.08250600 | -2.63854800 | -3.20530300 |
| C | 0.29439400  | -0.52984600 | -3.54596600 |
| H | -1.13493300 | -0.88462400 | -1.98130300 |
| H | -1.48455600 | -3.32378400 | -2.45671900 |
| H | -1.90980900 | -2.26870800 | -3.81357900 |
| H | -0.40820900 | -3.18925100 | -3.86447200 |
| H | 0.73989800  | 0.31834600  | -3.02437700 |
| H | 1.07436700  | -1.07011700 | -4.08989100 |
| H | -0.43474100 | -0.16066300 | -4.27052600 |
| C | 2.25165400  | -2.24295900 | 1.66410800  |
| C | 3.73426500  | -2.59188600 | 1.69322800  |
| C | 1.40086900  | -3.20927300 | 2.47907900  |

|    |             |             |             |
|----|-------------|-------------|-------------|
| H  | 2.14314900  | -1.23543100 | 2.04719700  |
| H  | 4.28940100  | -1.96666900 | 0.99123900  |
| H  | 4.10544800  | -2.40139300 | 2.70124700  |
| H  | 3.91601900  | -3.64532600 | 1.47131900  |
| H  | 0.34604700  | -2.93120000 | 2.43841200  |
| H  | 1.51158400  | -4.22724300 | 2.09643300  |
| H  | 1.72678800  | -3.19148400 | 3.52082900  |
| C  | -0.11576000 | -0.33917400 | 0.29632900  |
| O  | -0.19896000 | 0.63666100  | -0.62946600 |
| H  | -0.21428600 | 1.89603000  | -0.44995800 |
| C  | 0.40707200  | 0.20028300  | 1.63431800  |
| C  | -0.14981200 | -0.16804500 | 2.85602000  |
| C  | 1.47789000  | 1.09445400  | 1.61374600  |
| C  | 0.35081200  | 0.36018600  | 4.04453500  |
| H  | -0.96695800 | -0.87693800 | 2.88188400  |
| C  | 1.98723900  | 1.61283500  | 2.79919300  |
| H  | 1.94096200  | 1.34439300  | 0.66619900  |
| C  | 1.41956100  | 1.25131700  | 4.01949900  |
| H  | -0.09360300 | 0.07120900  | 4.98988700  |
| H  | 2.82886500  | 2.29602900  | 2.76988900  |
| H  | 1.81138500  | 1.65742400  | 4.94480400  |
| C  | -3.38159100 | -1.14012000 | 1.73905100  |
| C  | -2.52553700 | -0.29023700 | 0.77994100  |
| C  | -4.87577300 | -0.95455500 | 1.47711500  |
| C  | -3.30374000 | 0.01657100  | -0.50570200 |
| C  | -5.25788500 | -1.45573700 | 0.07543500  |
| C  | -4.11374700 | -1.20534700 | -0.92600700 |
| H  | -3.11455900 | -2.18996400 | 1.57703700  |
| H  | -3.98633200 | 0.85452900  | -0.32445100 |
| H  | -5.13560100 | 0.10695400  | 1.55314500  |
| H  | -3.14281700 | -0.90573800 | 2.77834200  |
| H  | -2.23069800 | 0.64725500  | 1.26274100  |
| H  | -5.46365900 | -1.47866300 | 2.23464900  |
| H  | -2.60394200 | 0.33779800  | -1.27363800 |
| H  | -5.43419500 | -2.53840900 | 0.13605700  |
| H  | -4.52998800 | -1.08369600 | -1.92964600 |
| H  | -3.45082700 | -2.07631300 | -0.95883600 |
| Br | 4.00141800  | 0.29833800  | -1.19980500 |
| N  | -0.39153100 | 3.10517300  | -0.57199200 |
| C  | -0.47480300 | 3.35219000  | -2.04061300 |
| C  | -1.59309600 | 2.59925500  | -2.74346200 |
| H  | 0.47844700  | 3.03707500  | -2.46436800 |
| H  | -0.57418600 | 4.43337600  | -2.19292000 |
| H  | -1.50130000 | 2.77699500  | -3.81635700 |
| H  | -1.49584900 | 1.52812800  | -2.56540700 |
| H  | -2.58568000 | 2.92907800  | -2.43494800 |
| C  | -1.69717900 | 3.37941200  | 0.08833600  |

|   |             |             |             |
|---|-------------|-------------|-------------|
| C | -1.63224600 | 3.34981400  | 1.61021800  |
| H | -2.38666300 | 2.61079300  | -0.26269600 |
| H | -2.06489100 | 4.35008700  | -0.26342700 |
| H | -1.08947700 | 2.47184600  | 1.97096000  |
| H | -1.15611600 | 4.24123500  | 2.01937800  |
| H | -2.64982800 | 3.30401900  | 2.00197800  |
| C | 0.69516800  | 3.92890400  | 0.02561800  |
| C | 2.03397500  | 3.78878700  | -0.68607100 |
| H | 0.79840600  | 3.61569900  | 1.06279500  |
| H | 0.36421900  | 4.97441800  | 0.02192100  |
| H | 2.81679000  | 4.18516300  | -0.03684800 |
| H | 2.27466300  | 2.74417700  | -0.90053700 |
| H | 2.06313300  | 4.34801400  | -1.62163500 |
| O | -1.34575000 | -1.06122700 | 0.49900200  |
| N | -6.46217100 | -0.73920000 | -0.36988500 |
| H | -6.82484400 | -1.16852100 | -1.21621100 |
| H | -7.19444700 | -0.83124200 | 0.32924100  |

### INT6'

|   |             |             |             |
|---|-------------|-------------|-------------|
| C | 3.10891000  | -2.14165100 | 0.36574000  |
| C | 3.73552600  | -1.11168300 | -0.24414300 |
| C | 1.55474800  | -0.67107500 | -0.23894400 |
| N | 1.75653600  | -1.85351400 | 0.37710500  |
| H | 3.50988000  | -3.04563500 | 0.78666200  |
| H | 4.78056300  | -0.94670800 | -0.43985500 |
| N | 2.76154900  | -0.21191900 | -0.61444900 |
| C | 0.74838500  | -2.78624300 | 0.95665200  |
| C | 1.34318500  | -3.54842000 | 2.13378500  |
| C | 0.23096600  | -3.71375400 | -0.13494000 |
| H | -0.06008400 | -2.15506300 | 1.30884600  |
| H | 1.81296600  | -2.87299800 | 2.85130600  |
| H | 0.53116800  | -4.07308700 | 2.63926400  |
| H | 2.07106000  | -4.29892200 | 1.81829300  |
| H | -0.22187800 | -3.13292600 | -0.93871300 |
| H | 1.04462400  | -4.32380500 | -0.53688800 |
| H | -0.52461400 | -4.38182400 | 0.28388700  |
| C | 3.05906900  | 1.10282000  | -1.23485200 |
| C | 3.96618300  | 0.91013000  | -2.44335000 |
| C | 3.65697300  | 2.03397800  | -0.18593200 |
| H | 2.09731000  | 1.47407200  | -1.57713000 |
| H | 3.52525900  | 0.20656100  | -3.15154100 |
| H | 4.09393000  | 1.87168300  | -2.94297100 |
| H | 4.95719200  | 0.55096600  | -2.15667000 |
| H | 2.98017200  | 2.14539400  | 0.66433800  |
| H | 4.61902700  | 1.65596400  | 0.17078200  |
| H | 3.81977300  | 3.01786400  | -0.63040900 |
| C | 0.24426900  | 0.13016200  | -0.58314700 |

|   |             |             |             |
|---|-------------|-------------|-------------|
| O | 0.17982400  | 0.39645200  | -1.85607100 |
| C | 0.25915200  | 1.37444300  | 0.35569600  |
| C | 0.16934100  | 2.65243900  | -0.18310200 |
| C | 0.38270700  | 1.22632400  | 1.73811600  |
| C | 0.20857800  | 3.77406800  | 0.64405600  |
| H | 0.07817100  | 2.74931300  | -1.25927800 |
| C | 0.43067500  | 2.34151600  | 2.56862200  |
| H | 0.44483200  | 0.22902400  | 2.16606900  |
| C | 0.34562200  | 3.62129000  | 2.02052200  |
| H | 0.13646600  | 4.76686300  | 0.21394000  |
| H | 0.53378500  | 2.21568700  | 3.64060900  |
| H | 0.38331000  | 4.49217200  | 2.66485800  |
| C | -4.42979300 | -0.77079200 | 0.68081700  |
| C | -4.91983500 | 0.02793800  | -0.52641800 |
| C | -2.93670400 | -0.52829000 | 0.96813200  |
| C | -4.14879300 | -0.39482600 | -1.79572200 |
| C | -2.12149600 | -0.27629800 | -0.30822100 |
| C | -2.76203200 | -0.98712300 | -1.49257400 |
| H | -5.03073500 | -0.52446400 | 1.56138000  |
| H | -4.74102600 | -1.12562000 | -2.35225900 |
| H | -2.51755500 | -1.41258000 | 1.45850400  |
| H | -4.60387700 | -1.83103100 | 0.47232400  |
| H | -5.98463200 | -0.19244900 | -0.67755400 |
| H | -2.80188300 | 0.31221000  | 1.65353500  |
| H | -4.04323700 | 0.48161100  | -2.44327100 |
| H | -2.09330700 | 0.79613400  | -0.52114700 |
| H | -2.84870700 | -2.05259200 | -1.24612000 |
| H | -2.10141300 | -0.90396100 | -2.35662500 |
| N | -4.70955500 | 1.46274500  | -0.26703600 |
| H | -5.08456000 | 2.00656300  | -1.03860000 |
| H | -5.23710400 | 1.74039500  | 0.55640800  |
| O | -0.79712600 | -0.74766600 | -0.07843700 |

### TS7'

|   |             |            |             |
|---|-------------|------------|-------------|
| C | -3.30318800 | 2.18449500 | 0.42732200  |
| C | -3.94928000 | 1.11187300 | -0.08600800 |
| C | -1.72626100 | 0.74428200 | -0.33027000 |
| N | -1.94936600 | 1.93788600 | 0.27034600  |
| H | -3.69004100 | 3.08507600 | 0.87439200  |
| H | -5.00275400 | 0.90015100 | -0.15913100 |
| N | -2.96834600 | 0.25034500 | -0.54716200 |
| C | -0.88942200 | 2.86012500 | 0.70812200  |
| C | -0.99513300 | 3.11624100 | 2.20786000  |
| C | -0.94331300 | 4.15013200 | -0.10325300 |
| H | 0.03574700  | 2.32921500 | 0.49107400  |
| H | -0.98348900 | 2.17724900 | 2.76485200  |
| H | -0.14997100 | 3.72502100 | 2.53469700  |

|   |             |             |             |
|---|-------------|-------------|-------------|
| H | -1.91317600 | 3.65540500  | 2.45561200  |
| H | -0.86361900 | 3.93766000  | -1.17093700 |
| H | -1.87812100 | 4.68791200  | 0.07714700  |
| H | -0.11670800 | 4.80235300  | 0.18498000  |
| C | -3.23469900 | -1.08669400 | -1.10121500 |
| C | -4.23683900 | -1.00451200 | -2.24690800 |
| C | -3.69698500 | -2.02295800 | 0.01160800  |
| H | -2.27563900 | -1.42515900 | -1.49226700 |
| H | -3.88984200 | -0.31240900 | -3.01624300 |
| H | -4.35731300 | -1.99210200 | -2.69563000 |
| H | -5.21806200 | -0.67528900 | -1.89617300 |
| H | -2.96517700 | -2.04632900 | 0.82292000  |
| H | -4.66097100 | -1.69655200 | 0.41226100  |
| H | -3.81358600 | -3.03585600 | -0.37980900 |
| C | 0.09250500  | -0.43275600 | -0.87939100 |
| O | -0.01569000 | -0.73178500 | -2.05888300 |
| C | -0.11898200 | -1.46545900 | 0.20926900  |
| C | -0.32029800 | -2.79424500 | -0.15107600 |
| C | -0.09121900 | -1.11232300 | 1.55884800  |
| C | -0.50836200 | -3.76661300 | 0.82987200  |
| H | -0.33226600 | -3.05654700 | -1.20292500 |
| C | -0.28223600 | -2.07885100 | 2.53790600  |
| H | 0.06679500  | -0.07282500 | 1.82604500  |
| C | -0.49372700 | -3.40995300 | 2.17390300  |
| H | -0.66806600 | -4.79967600 | 0.54346000  |
| H | -0.26823800 | -1.79916100 | 3.58510700  |
| H | -0.64417400 | -4.16346400 | 2.93837800  |
| C | 4.48864900  | 1.19357400  | 0.47794000  |
| C | 5.13043400  | 0.05460000  | -0.31392900 |
| C | 2.98517500  | 0.95579900  | 0.71331400  |
| C | 4.48541500  | -0.05195900 | -1.71130900 |
| C | 2.33065300  | 0.19095600  | -0.43995200 |
| C | 3.04142400  | 0.47991800  | -1.75326500 |
| H | 5.00292200  | 1.32394600  | 1.43428400  |
| H | 5.09125600  | 0.50155300  | -2.43264300 |
| H | 2.47596000  | 1.92021900  | 0.80429800  |
| H | 4.63780800  | 2.11990200  | -0.08501300 |
| H | 6.19721900  | 0.27893800  | -0.44078200 |
| H | 2.81666500  | 0.41226600  | 1.64570800  |
| H | 4.50408600  | -1.10084700 | -2.02351600 |
| H | 2.37762800  | -0.88350600 | -0.23641400 |
| H | 3.03811700  | 1.56481900  | -1.90838900 |
| H | 2.48764900  | 0.03152700  | -2.57979300 |
| N | 4.93645300  | -1.20611700 | 0.42224600  |
| H | 5.41202800  | -1.96131500 | -0.06291800 |
| H | 5.37558800  | -1.13758400 | 1.33646700  |
| O | 0.94752500  | 0.59885900  | -0.49154600 |

**PR2**

|   |             |             |             |
|---|-------------|-------------|-------------|
| C | 1.16495200  | 1.71493100  | -0.22987700 |
| O | 1.70998000  | 2.78336200  | -0.09153500 |
| C | 1.91294900  | 0.42588900  | -0.09299500 |
| C | 2.88480000  | 0.31702700  | 0.90069200  |
| C | 1.71282000  | -0.61976000 | -0.99524000 |
| C | 3.63530800  | -0.84815300 | 1.00908600  |
| H | 3.04178000  | 1.14246500  | 1.58494700  |
| C | 2.48057000  | -1.77380600 | -0.89849300 |
| H | 0.97423900  | -0.52182500 | -1.78258000 |
| C | 3.43528100  | -1.89183100 | 0.10885500  |
| H | 4.38004300  | -0.94024300 | 1.79037500  |
| H | 2.33442500  | -2.57872900 | -1.60831100 |
| H | 4.02704800  | -2.79604200 | 0.18842600  |
| C | -3.22551800 | -0.34883800 | -0.98055100 |
| C | -3.24094000 | -0.97853000 | 0.41233500  |
| C | -1.81443400 | 0.13083400  | -1.37175900 |
| C | -2.85446200 | 0.07633600  | 1.46933900  |
| C | -1.02298900 | 0.61648500  | -0.15655800 |
| C | -1.94881900 | 1.18555000  | 0.90525600  |
| H | -3.59476400 | -1.06181300 | -1.72228800 |
| H | -3.76017500 | 0.53127100  | 1.87607400  |
| H | -1.89309100 | 0.96178300  | -2.07765200 |
| H | -3.92319100 | 0.49347500  | -0.97989200 |
| H | -4.25832800 | -1.32879200 | 0.62583000  |
| H | -1.26845300 | -0.67169500 | -1.87122800 |
| H | -2.35255100 | -0.42796200 | 2.30035100  |
| H | -0.43911400 | -0.19631700 | 0.27235100  |
| H | -2.55111000 | 1.97609900  | 0.44574800  |
| H | -1.36304100 | 1.64580100  | 1.70392800  |
| N | -2.27275400 | -2.08678300 | 0.44452800  |
| H | -2.31138800 | -2.54890300 | 1.34809200  |
| H | -2.53108400 | -2.78836500 | -0.24396500 |
| O | -0.12486400 | 1.67669700  | -0.58877000 |

**TS6a'**

|   |             |             |            |
|---|-------------|-------------|------------|
| C | -0.96546200 | 1.90495300  | 2.61098500 |
| C | -1.43282000 | 2.70160200  | 1.61708300 |
| C | -1.22079500 | 0.61229600  | 0.75712300 |
| N | -0.84354800 | 0.63970500  | 2.06183800 |
| H | -0.69868000 | 2.14096700  | 3.62851200 |
| H | -1.63287500 | 3.76050600  | 1.61134500 |
| N | -1.59217700 | 1.89243600  | 0.51001100 |
| C | -0.51790300 | -0.58086000 | 2.80657400 |
| C | -1.80012600 | -1.21877500 | 3.33930200 |
| C | 0.48461500  | -0.30195000 | 3.92111100 |

|   |             |             |             |
|---|-------------|-------------|-------------|
| H | -0.06717700 | -1.25083400 | 2.06902000  |
| H | -2.48492300 | -1.43651300 | 2.51475700  |
| H | -1.57234000 | -2.15062500 | 3.86665800  |
| H | -2.30061600 | -0.53935500 | 4.03783400  |
| H | 1.34520700  | 0.26167000  | 3.55102800  |
| H | 0.02311800  | 0.26053500  | 4.73968300  |
| H | 0.84104500  | -1.24899800 | 4.33556000  |
| C | -2.15032100 | 2.31824500  | -0.78216600 |
| C | -1.87069700 | 3.79006800  | -1.05860800 |
| C | -3.64455200 | 2.00096900  | -0.81897500 |
| H | -1.62727900 | 1.71831200  | -1.53124800 |
| H | -0.80309700 | 4.00222600  | -0.96372900 |
| H | -2.18033700 | 4.02337300  | -2.08088500 |
| H | -2.44354500 | 4.43993500  | -0.38751000 |
| H | -3.81866200 | 0.94383800  | -0.59868100 |
| H | -4.18000000 | 2.60255600  | -0.07594700 |
| H | -4.05571900 | 2.23006200  | -1.80739900 |
| C | -0.40748000 | -1.03587100 | -0.96906100 |
| O | -0.17288200 | -0.15718000 | -1.85950400 |
| C | -1.69451500 | -1.76811400 | -1.02157000 |
| C | -2.68048700 | -1.33123900 | -1.90722600 |
| C | -1.91815300 | -2.87905800 | -0.20621600 |
| C | -3.89799200 | -2.00056300 | -1.96839100 |
| H | -2.48396000 | -0.46774400 | -2.53459800 |
| C | -3.14054100 | -3.54060900 | -0.26633500 |
| H | -1.14079600 | -3.21075800 | 0.47422700  |
| C | -4.13173800 | -3.10149200 | -1.14454400 |
| H | -4.66611600 | -1.66056700 | -2.65567200 |
| H | -3.32090500 | -4.40075500 | 0.37058100  |
| H | -5.08440600 | -3.62011700 | -1.18937600 |
| H | 0.49608000  | 0.66396200  | -1.59114900 |
| C | 4.19774400  | -2.30281800 | -0.17519500 |
| C | 4.62289200  | -0.82984600 | -0.22894900 |
| C | 2.72355100  | -2.47880600 | -0.60559200 |
| C | 3.80422100  | -0.02841400 | 0.80107900  |
| C | 1.92408400  | -1.20506000 | -0.34256800 |
| C | 2.35578800  | -0.53641800 | 0.94764100  |
| H | 4.84465600  | -2.91107500 | -0.81648300 |
| H | 4.30522500  | -0.08910600 | 1.77283300  |
| H | 2.26638200  | -3.30262700 | -0.04475800 |
| H | 4.34269800  | -2.66534100 | 0.85027000  |
| H | 5.68520200  | -0.75788300 | 0.05093000  |
| H | 2.65854800  | -2.72395900 | -1.66898300 |
| H | 3.78542800  | 1.02644500  | 0.50870000  |
| H | 2.03723900  | -0.51947300 | -1.17782300 |
| H | 2.28688900  | -1.27620300 | 1.75834100  |
| H | 1.68396400  | 0.29649400  | 1.17259200  |



|    |            |             |             |
|----|------------|-------------|-------------|
| N  | 4.37512300 | -0.32138500 | -1.58268200 |
| H  | 4.29716700 | 0.69186600  | -1.60355300 |
| H  | 5.10607400 | -0.60314000 | -2.22735900 |
| O  | 0.51611900 | -1.59240600 | -0.23754100 |
| Br | 1.43997000 | 2.14755100  | -1.03824400 |

**INT6a'**

|    |             |             |             |
|----|-------------|-------------|-------------|
| C  | 1.33050100  | 0.08693600  | -0.07936800 |
| O  | 0.86720400  | 1.26700100  | -0.07503900 |
| C  | 2.78863800  | -0.07502300 | -0.04214700 |
| C  | 3.60115300  | 1.06248700  | -0.01497200 |
| C  | 3.34978900  | -1.35573000 | -0.03262300 |
| C  | 4.97957600  | 0.91378300  | 0.01947500  |
| H  | 3.15182200  | 2.04709100  | -0.02250900 |
| C  | 4.72927400  | -1.49334900 | 0.00305300  |
| H  | 2.70872500  | -2.22770600 | -0.05262100 |
| C  | 5.54162900  | -0.36105200 | 0.02891600  |
| H  | 5.61553000  | 1.78970500  | 0.03884700  |
| H  | 5.17183400  | -2.48128100 | 0.01125300  |
| H  | 6.61894400  | -0.47359100 | 0.05640400  |
| H  | -0.15072700 | 1.51151800  | -0.08566800 |
| C  | -2.89889600 | -0.83946400 | 1.27107700  |
| C  | -3.49633400 | -1.76377100 | 0.19303000  |
| C  | -1.35916200 | -0.82989400 | 1.27641700  |
| C  | -2.52845700 | -2.90708000 | -0.10674000 |
| C  | -0.84353100 | -1.01313900 | -0.13847800 |
| C  | -1.20944700 | -2.38410400 | -0.70573400 |
| H  | -3.26338100 | 0.17766200  | 1.10989800  |
| H  | -2.33337300 | -3.44602100 | 0.82463700  |
| H  | -0.97085000 | -1.65285100 | 1.88460300  |
| H  | -3.24490400 | -1.16051500 | 2.25552700  |
| H  | -4.43129000 | -2.18697500 | 0.57974600  |
| H  | -0.99599800 | 0.10548800  | 1.70844700  |
| H  | -2.98307400 | -3.62229800 | -0.79657200 |
| H  | -1.17857600 | -0.20782800 | -0.79203700 |
| H  | -0.40069800 | -3.07815300 | -0.46498600 |
| H  | -1.27567600 | -2.31682300 | -1.79174200 |
| N  | -3.71643600 | -1.00065300 | -1.04466500 |
| H  | -4.16924400 | -1.59026000 | -1.73746100 |
| H  | -4.34923000 | -0.22669500 | -0.86666200 |
| O  | 0.63678800  | -0.98502600 | -0.11899600 |
| Br | -1.81271800 | 2.55842000  | -0.08644600 |

**TS7a'**

|   |             |             |             |
|---|-------------|-------------|-------------|
| C | -0.88113800 | -1.32930500 | -0.43617900 |
| O | -0.54456000 | -0.27919300 | -0.93108900 |
| C | -2.30207700 | -1.77475200 | -0.31271200 |

|    |             |             |             |
|----|-------------|-------------|-------------|
| C  | -3.28007400 | -1.01773000 | -0.95932600 |
| C  | -2.66587400 | -2.88690700 | 0.44842000  |
| C  | -4.62326700 | -1.36607200 | -0.84368400 |
| H  | -2.97043100 | -0.15774900 | -1.54797700 |
| C  | -4.00798500 | -3.22620900 | 0.56716800  |
| H  | -1.90552400 | -3.46703800 | 0.94713800  |
| C  | -4.98424600 | -2.47154300 | -0.07724500 |
| H  | -5.37796400 | -0.77806100 | -1.34793600 |
| H  | -4.29577800 | -4.08908100 | 1.16273000  |
| H  | -6.02885800 | -2.73851900 | 0.01522500  |
| H  | 0.31975600  | 1.72164000  | -0.44314700 |
| C  | 3.49703300  | -1.59111300 | -1.19523300 |
| C  | 4.18183000  | -1.92680400 | 0.14304800  |
| C  | 2.01855500  | -2.02124600 | -1.25149100 |
| C  | 3.47664900  | -3.11341100 | 0.79870500  |
| C  | 1.37544900  | -1.85239400 | 0.11185700  |
| C  | 2.01946600  | -2.76889700 | 1.15599500  |
| H  | 3.57046900  | -0.51282600 | -1.37171100 |
| H  | 3.51071500  | -3.95461700 | 0.10619800  |
| H  | 1.92995500  | -3.06877600 | -1.54636200 |
| H  | 4.03488700  | -2.08766500 | -2.01063000 |
| H  | 5.22208800  | -2.20200800 | -0.05953600 |
| H  | 1.48520800  | -1.41691000 | -1.99395600 |
| H  | 4.01987300  | -3.42369300 | 1.70029400  |
| H  | 1.44752900  | -0.79945400 | 0.42064900  |
| H  | 1.42935400  | -3.68779500 | 1.20917500  |
| H  | 1.97004400  | -2.28577100 | 2.13768900  |
| N  | 4.09586300  | -0.76470900 | 1.04497000  |
| H  | 4.57979000  | -0.97239000 | 1.91454200  |
| H  | 4.57381400  | 0.02668400  | 0.63340000  |
| O  | -0.02911600 | -2.21062100 | 0.08450500  |
| Br | 1.60476900  | 1.96128800  | -1.11672000 |
| N  | -0.88019500 | 2.52591800  | 0.70273500  |
| C  | -0.06327100 | 3.17340800  | 1.73935200  |
| C  | 0.61607600  | 4.47164900  | 1.31541300  |
| H  | 0.70313300  | 2.45413400  | 2.05282300  |
| H  | -0.68623800 | 3.38110400  | 2.62680500  |
| H  | 1.26477800  | 4.80922300  | 2.12216800  |
| H  | 1.22790800  | 4.32351100  | 0.42457700  |
| H  | -0.10633000 | 5.26648400  | 1.11659100  |
| C  | -1.61895100 | 3.51180000  | -0.10429000 |
| C  | -2.51971600 | 2.88380300  | -1.16121700 |
| H  | -0.87470700 | 4.12390600  | -0.62337700 |
| H  | -2.20480700 | 4.18355600  | 0.54108500  |
| H  | -1.97301900 | 2.13229500  | -1.73547800 |
| H  | -3.40173600 | 2.41717400  | -0.72130700 |
| H  | -2.86487000 | 3.66664000  | -1.83860600 |

|   |             |             |            |
|---|-------------|-------------|------------|
| C | -1.77127800 | 1.52765400  | 1.29654300 |
| C | -1.02460900 | 0.50431400  | 2.14554100 |
| H | -2.27653300 | 1.00143600  | 0.48337500 |
| H | -2.54518000 | 2.02288100  | 1.90553800 |
| H | -1.65556300 | -0.37949600 | 2.29986100 |
| H | -0.11277200 | 0.18388100  | 1.63537100 |
| H | -0.75162100 | 0.89478000  | 3.12474700 |
